# Supplementary material for: Intimate partner violence and breastfeeding: a systematic review
Source: PubMed Central journal article supplement — BMJ Open. 2020 Oct 31;10(10):e034153. doi: 10.1136/bmjopen-2019-034153 (PMC7783610; doi:10.1136/bmjopen-2019-034153), 2020-10-31
Supplement: bmjopen-2019-034153.draft_revisions.pdf [file bmjopen-2019-034153.draft_revisions.pdf]

# BMJ Open

BMJ Open is committed to open peer review. As part of this commitment we make the peer review history of every article we publish publicly available.

When an article is published we post the peer reviewers' comments and the authors' responses online. We also post the versions of the paper that were used during peer review. These are the versions that the peer review comments apply to.

The versions of the paper that follow are the versions that were submitted during the peer review process. They are not the versions of record or the final published versions. They should not be cited or distributed as the published version of this manuscript.

BMJ Open is an open access journal and the full, final, typeset and author-corrected version of record of the manuscript is available on our site with no access controls, subscription charges or pay-per-view fees (<http://bmjopen.bmj.com>).

If you have any questions on BMJ Open's open peer review process please email [info.bmjopen@bmj.com](mailto:info.bmjopen@bmj.com)

# BMJ Open

## The Association of Intimate Partner Violence with Breastfeeding Outcomes: A Systematic Review

|                               |                                                                                                                                                                                                                                                                                                                                                                                                                                                                                                               |
|-------------------------------|---------------------------------------------------------------------------------------------------------------------------------------------------------------------------------------------------------------------------------------------------------------------------------------------------------------------------------------------------------------------------------------------------------------------------------------------------------------------------------------------------------------|
| Journal:                      | <i>BMJ Open</i>                                                                                                                                                                                                                                                                                                                                                                                                                                                                                               |
| Manuscript ID                 | bmjopen-2019-034153                                                                                                                                                                                                                                                                                                                                                                                                                                                                                           |
| Article Type:                 | Original research                                                                                                                                                                                                                                                                                                                                                                                                                                                                                             |
| Date Submitted by the Author: | 07-Sep-2019                                                                                                                                                                                                                                                                                                                                                                                                                                                                                                   |
| Complete List of Authors:     | Normann, Anne Katrine; Institute of Clinical Research, University of Southern Denmark , Department of Obstetrics and Gynecology<br>Bakiewicz, Aleksandra<br>Kjerulff Madsen , Frederikke<br>Khan , Khalid; Women's Health Research Unit<br>Rasch, Vibeke; Odense Universitetshospital, Obstetrics and Gynaecology;<br>Syddansk Universitet, Institute of Clinical Research<br>Linde, Ditte ; Odense Universitetshospital, Obstetrics and Gynaecology;<br>Syddansk Universitet, Institute of Clinical Research |
| Keywords:                     | OBSTETRICS, PUBLIC HEALTH, Maternal medicine < OBSTETRICS                                                                                                                                                                                                                                                                                                                                                                                                                                                     |
|                               |                                                                                                                                                                                                                                                                                                                                                                                                                                                                                                               |

SCHOLARONE™  
Manuscripts

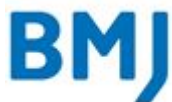

I, the Submitting Author has the right to grant and does grant on behalf of all authors of the Work (as defined in the below author licence), an exclusive licence and/or a non-exclusive licence for contributions from authors who are: i) UK Crown employees; ii) where BMJ has agreed a CC-BY licence shall apply, and/or iii) in accordance with the terms applicable for US Federal Government officers or employees acting as part of their official duties; on a worldwide, perpetual, irrevocable, royalty-free basis to BMJ Publishing Group Ltd ("BMJ") its licensees and where the relevant Journal is co-owned by BMJ to the co-owners of the Journal, to publish the Work in this journal and any other BMJ products and to exploit all rights, as set out in our [licence](#).

The Submitting Author accepts and understands that any supply made under these terms is made by BMJ to the Submitting Author unless you are acting as an employee on behalf of your employer or a postgraduate student of an affiliated institution which is paying any applicable article publishing charge ("APC") for Open Access articles. Where the Submitting Author wishes to make the Work available on an Open Access basis (and intends to pay the relevant APC), the terms of reuse of such Open Access shall be governed by a Creative Commons licence – details of these licences and which [Creative Commons](#) licence will apply to this Work are set out in our licence referred to above.

Other than as permitted in any relevant BMJ Author's Self Archiving Policies, I confirm this Work has not been accepted for publication elsewhere, is not being considered for publication elsewhere and does not duplicate material already published. I confirm all authors consent to publication of this Work and authorise the granting of this licence.

1  
2  
3  
4  
5 **The Association of Intimate Partner Violence with Breastfeeding Outcomes: A**  
6 **Systematic Review**  
7

8 A K Normann<sup>a</sup>, A Bakiewicz<sup>a,b</sup>, F K Madsen<sup>a</sup>, K S Khan<sup>d</sup>, V Rasch<sup>a,b</sup>, D S. Linde<sup>a,b,c</sup>,  
9

10 <sup>a</sup>Institute of Clinical Research, University of Southern Denmark, Odense, Denmark, <sup>b</sup>Department of Obstetrics  
11 and Gynecology, Odense University Hospital, Odense, Denmark, <sup>c</sup>OPEN, Odense Patient Data Explorative  
12 Network, Odense University Hospital, Odense, Denmark

13 <sup>d</sup>Women's Health Research Unit, Barts and the London School of Medicine and Dentistry, Queen Mary  
14 University of London, UK  
15

16  
17  
18 *Corresponding author:* Anne Katrine Normann Nielsen, Institute of Clinical Research, University of Southern  
19 Denmark, 5000 Odense C, Denmark, Ph.: +45 28 74 68 20; e-mail: [annekatrinenn@gmail.com](mailto:annekatrinenn@gmail.com)  
20  
21  
22  
23  
24  
25  
26  
27  
28  
29  
30  
31  
32  
33  
34  
35  
36  
37  
38  
39  
40  
41  
42  
43  
44  
45  
46  
47  
48  
49  
50  
51  
52  
53  
54  
55  
56  
57  
58  
59  
60

**Abstract:**

**Objective:** The association between intimate partner violence (IPV) and breastfeeding is unclear. We conducted a systematic review to summarise the evidence on breastfeeding outcomes following exposure of IPV prior to, during and after pregnancy.

**Design:** Systematic review.

**Data sources:** PubMed, Embase, SCOPUS and Global Health Library.

**Eligibility criteria for selecting studies:** We searched for published studies without study design and language restrictions (up to July 2019). Studies comparing various breastfeeding outcomes (initiation, duration and exclusive breastfeeding) in women with and without IPV exposure in any form (physical, psychological or sexual) and at any stage (one year pre, during or post pregnancy) were included. Study quality assessments (using the Newcastle-Ottawa scale) and data extraction were performed in duplicate. As meta-analysis proved unfeasible, results were summarised taking precision and quality into account.

**Results:** A total of 16 studies (participants n= 414,393) were included. Their analyses adjusted the IPV-outcome association for 48 different confounders. Ten studies found that exposure to IPV in any form and at any stage had a significant negative effect on a range of breastfeeding practices (study quality high=4, fair/low=6; participants=264,482). IPV exposure significantly shortened breastfeeding duration in 4/7 studies reporting this outcome (study quality high=1, fair/low=3; participants=250,017). It significantly led to early termination of exclusive breastfeeding in 5/10 studies reporting this outcome (study quality high=3, fair/low=2; participants=13,737). It significantly reduced breastfeeding initiation in 2/6 studies reporting this outcome (study quality high=1, fair=1; participants=11,187).

**Conclusion:** This evidence synthesis suggests, based on precise, well-controlled results from quality studies, that IPV exposure appears to affect some breastfeeding outcomes negatively. Individual patient data meta-analysis will be required to quantify the magnitude of the association for specific IPV-outcome combinations.

**Funding:** This study was funded by the University of Southern Denmark.

**PROSPERO registration number:** CRD42019129353.

**Strengths and limitations of this study:**

- We included a proper quality assessment of included studies by a validated tool and a thorough evaluation of different outcome measures.
- We minimized the risk of error and subjectivity by duplicate assessment.
- The limitation of this systematic review reflects a weakness in the underlying evidence not in the robustness of reviewing.

- We reported the review complying with as many of the PRISMA and MOOSE guideline statements as possible. Our approach to making transparent these variations in evidence merits consideration as a strength of the review and we objectively exposed the complexity of the topic.

## Introduction

Intimate partner violence (IPV), defined as any behavior that causes physical, psychological or sexual harm to those within an intimate relationship<sup>1,2</sup>, and it is mostly perpetrated by men against women<sup>1-3</sup>. Evidence points out that IPV have both immediate and long-life mental and physical health consequences, including depression and physical impairment in the victims<sup>3-5</sup>. World Health Organization (WHO) estimates that one in three women, are exposed to either physical and/or sexual violence from a current or former partner<sup>2</sup>.

It has been found that IPV is linked to negative reproductive health outcomes, such as preterm birth, low birth weight, insufficient weight gain, miscarriage, induced abortion, difficulties or lack of attachment to the baby<sup>3-6</sup> and that it may influence the establishment of breastfeeding practices<sup>7</sup>. However, the association between breastfeeding and IPV is complex as it involves various forms of violence and types of breastfeeding practices. Further, there is no transparency in the acknowledgment of factors that may confound the association and hence here is variation in the statistical models used for analyses. This can be the reason why studies on the relationship of IPV with breastfeeding practices have been inconsistent. Interestingly, one study has even found that IPV exposure might improve breastfeeding initiation<sup>8</sup>. A recent systematic review has concluded that the majority amongst its 12 included papers (participants= 133,861) showed a negative association, reducing breastfeeding initiation and exclusive breastfeeding for the first six months<sup>9</sup>. The variety of the results it collated can be reflective of heterogeneity in the population enrolled, diversity in the measurements of both IPV exposure and breastfeeding outcomes, inconsistency in the modelling used for statistical analyses, and differences in the study designs and methods. Yet the review did not involve proper quality assessment and no detailed description of confounders was made.

As the extent of any association between IPV and breastfeeding is not firm and new literature has been published recently, we conducted a robust systematic review thoroughly investigating the association of exposure to IPV pre, during and post pregnancy with breastfeeding outcomes synthesizing evidence with due regard to precision and quality.

Keywords: Intimate partner violence, domestic violence, breastfeeding, breastfeeding practices, exclusive breastfeeding, breastfeeding initiation.

## Methods

The systematic review was protocol-driven with prospective registration (PROSPERO, ID: CRD42019129353) and reported according to PRISMA<sup>10</sup> and MOOSE<sup>11</sup> guidelines

## Eligibility criteria

1  
2  
3  
4 We searched PubMed, Embase, SCOPUS and Global Health Library from the 8<sup>th</sup> of March to 12<sup>th</sup> of March 2019. An  
5 updated search was conducted the 18<sup>th</sup> of July 2019. Search terms included “intimate partner violence” OR “spouse  
6 abuse” OR “domestic violence” OR “physical abuse” OR “sex offenses” OR “battered women” AND “breast feeding”  
7 OR “breastmilk expression” OR “feeding behavior” OR “milk, human” OR lactation OR “milk ejection” (full search  
8 in Appendix, S1). The literature search had no date or language restrictions. Eligible studies were original publications,  
9 that reported exposure to intimate partner violence (IPV) and breastfeeding practices.  
10  
11  
12

13  
14 WHO recommends initiating of breastfeeding within one hour of birth, exclusive breastfeeding for six months and  
15 that mothers should continue breastfeeding for up to two years or beyond together with complementary feeding <sup>12</sup>,  
16 and therefore we looked for outcomes according to these recommendations. We included studies with women exposed  
17 to violence one year prior to pregnancy, during pregnancy and in the postpartum period. Therefore, we excluded  
18 studies of women with experiences of childhood abuse and later breastfeeding practices.  
19  
20  
21

22  
23 After removing duplicates, two authors independently screened titles, abstract and full-text (AKN and AB) using  
24 Covidence ([www.covidence.org](http://www.covidence.org)) <sup>13</sup>. Disagreements were solved through discussion. One author (AKN) extracted data  
25 from included studies into a standardized Excel template. Extracted data included: Title, first author, publication year,  
26 country, study characteristics, study objective, participant characteristics, sample size, inclusion/exclusion criteria,  
27 type of exposure, measurement tool of exposure, primary outcomes and confounders adjusted for. Outcome data were  
28 verified by a second author (FKM).  
29  
30  
31

### 32 33 **Study quality assessment**

34 The Newcastle Ottawa scale was used to assess the quality of cohort studies <sup>14-18</sup> and a modified version of the scale  
35 was used for cross-sectional studies <sup>19-29</sup> The scale addresses the following domains: selection process, comparability  
36 and the ascertainment of either exposure or outcome of interest. A maximum of nine stars can be given if all domains  
37 are well described in a given study. For the cross-sectional version of the scale, the domain that assessed confounders  
38 was modified and no stars were given if papers did not justify their choice of confounders in their statistical analysis.  
39 A total of 10 stars could be given in the cross-sectional scale. As a modification of both scales, points were given  
40 according to the number of confounding domains adjusted for (Appendix table S2.2).  
41  
42

43 AKN and DSL conducted the quality assessment of Madsen et al., as FKM was co-author of this study and therefore  
44 considered ineligible.  
45  
46  
47

48 Cohort studies were regarded as ‘good quality’ if rewarded 3 or 4 stars in selection domain AND 1 or 2 stars in  
49 comparability domain AND 2 or 3 stars in outcome/exposure domain, ‘fair quality’ if rewarded 2 stars in selection  
50 domain AND 1 or 2 stars in comparability domain AND 2 or 3 stars in outcome/exposure domain and ‘poor quality’  
51 if rewarded 0 or 1 star in selection domain OR 0 stars in comparability domain OR 0 or 1 stars in outcome/exposure  
52 domain. Cross-sectional studies were regarded as ‘very good’ if rewarded 9-10 points, ‘good’ if rewarded 7-8 points,  
53 ‘satisfactory’ if rewarded 5-6 points and ‘unsatisfactory’ if rewarded 0-4 points.  
54  
55  
56  
57

### 58 59 **Data synthesis**

Results for the various IPV-outcome combinations were individually tabulated and summarised in forest plots. Inferences were generated taking study precision and quality into account as quantitative synthesis (meta-analysis) proved unfeasible. The substantial heterogeneity of exposure, outcome, study quality and statistical models in the adjusted odds ratios (aOR) reported in individual studies was the reason we settled for a qualitative synthesis in the form of vote-counting, which we conducted within broad exposure-outcome subgroups stratified by study quality and precision to minimise bias. To determine whether a study showed a negative association or no difference we relied on numerical data in vote-counting to avoid subjectivity. This approach is in line with what is considered suitable given study variability in previous review publications<sup>30, 31</sup>

## Results

The database searches resulted in 2062 records, with 1634 records eligible for title and abstract screening after removal of duplicates (Fig. 1). After full text screening 16 studies met the inclusion criteria of which 11 were cross-sectional<sup>15, 19-29</sup> and five were cohort studies<sup>17, 18, 32, 33</sup>. The studies were published between 2006 and 2019. Four studies were conducted in The United States<sup>15, 20, 23, 29</sup>, four in India<sup>19, 21, 24, 27</sup>, two in Brazil<sup>17, 26</sup>, one in Tanzania<sup>32</sup>, one in Spain<sup>33</sup>, one in Sweden<sup>22</sup>, one in Norway<sup>18</sup>, one in Australia<sup>25</sup> and one in Hong Kong<sup>28</sup>. Population age varied from 14 years to 49 years, and it was reported as means (n= 3) or in intervals (n= 13). The sample sizes varied from 69 to 195,264 with a mean sample of 25,899 (Table 1). Exposure (IPV) was measured through questionnaires<sup>20, 21, 23, 24, 27, 29, 32</sup> or through various validated tools: Conflict-Tactic Scale (CTS)<sup>15, 17, 19, 26, 28</sup>, Abuse Assessment Screen (AAS)<sup>28</sup>, Index of Spouse Abuse (ISA)<sup>33</sup>, Composite Abuse Scale (CAS)<sup>25</sup> and Norvold Abuse Questionnaire<sup>22</sup> (Table 1)

Two of the studies only focused on physical violence<sup>20, 26</sup> whereas one study focused only on psychological violence<sup>19</sup>. The majority of studies measured IPV as 'any IPV' and did not separate types of violence into groups<sup>15, 17, 20, 22, 25, 27-29</sup>. Five studies measured both physical, or/and psychological or/and sexual violence respectively and combined to compare the differences in exposure of a certain type of IPV<sup>18, 21, 24, 32, 33</sup>. The outcome, breastfeeding was measured as early cessation/shortened duration of breastfeeding; initiation of breastfeeding, or exclusive breastfeeding. Some studies investigated more than one outcome and therefore, one study could be presented in more than one outcome table.

Overall, the included studies adjusted for 48 different confounders within the following domains: maternal sociodemographic, relationship characteristics, maternal lifestyle and health, economy, pregnancy and postpartum related problems, child characteristics, support during pregnancy and postpartum, violence or stressful life events, pregnancy intention, caste and religion. Most studies did not justify the choice of confounders<sup>17, 19-23, 25, 27-29</sup>. Sorbo et al. and Madsen et. al. used acrylic graph analysis (DAG) to justify the confounders adjusted for in their analysis and afterwards made a sensitivity analysis to determine whether the association between abuse and breastfeeding practices was mediated primarily through postpartum depression.

## Study quality assessment



1  
2  
3  
4 Of the five cohort studies, one study was judged as 'good quality'<sup>32</sup>, three studies was judged as 'fair quality'<sup>15, 18, 33</sup>  
5 and one study was judged as 'poor quality'<sup>17</sup>. Of the 11 cross-sectional studies, six were judged as having 'good'  
6 quality<sup>19-21, 24, 26, 28</sup>, one was judged as 'satisfactory'<sup>29</sup> and three studies was judged as 'unsatisfactory'<sup>23, 25, 27</sup>. One  
7 cross-sectional study was not assessed using NOS for cross-sectional, since the study was embedded from a cohort<sup>22</sup>,  
8 and therefore NOS for cohort studies was used to assess the quality and was judged as 'poor quality'<sup>22</sup>. In the figure  
9 illustration of the NOS scale, the studies, which reached a maximum of stars in each category of the NOS-scale was  
10 rewarded a 'yes' and further if the studies adjusted for more than four confounding domains, they were rewarded a  
11 'yes' (Fig. 2).

### 17 **The association between IPV and breastfeeding outcomes**

18 Seven studies reported outcomes based on early cessation or shortened duration of breastfeeding when exposed to  
19 violence<sup>15, 18-20, 23, 25, 29</sup>. Three studies found a significant association between exposure to IPV and early  
20 cessation/shortened duration of breastfeeding<sup>15, 18, 20</sup>.

21 One study found a statistically significant association between reduction in duration/cessation and IPV (OR=1.41 95%  
22 CI 1.15-1.74). However, the association became insignificant when adjusted for confounders (aOR=0.94; 95% CI  
23 0.76-1.7)<sup>29</sup>. Miller-graff et. al found that IPV was associated with decreased odds ratio of for continuing breastfeeding  
24 (OR=0.22; 95 % CI 0.5-0.85) or in other words, IPV was associated with an increased risk of shortened duration of  
25 breastfeeding. Three of the studies found no association between violence and breastfeeding duration or early  
26 cessation<sup>19, 23, 25</sup>. Three studies did not distinguish between period of exposure<sup>17, 25, 27</sup>, whereas the remaining papers  
27 categorized time of exposure. One study<sup>25</sup> found no association between IPV and breastfeeding practices and  
28 concluded that IPV itself did not influence breastfeeding outcomes as much as maternal age, education and birth  
29 method (Fig. 3)

30 Six studies investigated the association between exposure to IPV and initiation of breastfeeding<sup>15, 20, 21, 23, 29, 33</sup>. Two  
31 studies found a statistically significant association between initiation of breastfeeding and exposure to either physical  
32 or sexual violence<sup>21</sup> (aOR physical=0.81; 95% CI 0.71-0.93. aOR sexual=0.52; 95% CI 0.36-0.76) or psychological  
33 violence<sup>33</sup> (aOR 2; 95% CI 1.2-3.3). Four studies found no association when exposed to multiple types of violence  
34 combined<sup>15, 21, 23, 29</sup>. Ten studies assessed exposure to violence in relation to risk of early termination of exclusive  
35 breastfeeding and five studies found a statistically association<sup>17, 21, 24, 28, 32</sup>, and five studies found no statistically  
36 association<sup>15, 22, 23, 26, 27</sup> (Fig. 3).

## 48 **Discussion**

### 49 **Main findings**

50 This systematic review summarized the evidence, including substantial amount of new, previously synthesized  
51 evidence, between exposure to IPV and breastfeeding practices. Forty-eight different confounders were controlled for  
52 in the studies. Our meticulous quality assessment judged the majority of studies included as being good quality, and  
53 a quarter as being of fair quality. The majority of studies found that exposure to IPV in any form and at any stage had  
54 a significant negative effect on a range of breastfeeding practices. IPV exposure shortened breastfeeding duration, and  
55  
56  
57  
58  
59  
60

1  
2  
3  
4 it led to early termination of exclusive breastfeeding, but it did not reduce initiation. These inferences have for the  
5 following provisos in interpretation.  
6  
7

### 8 **Strengths and limitations:**

9  
10 Overall, the data we included tripled the evidence size compared to the previous review (280·532 more participants  
11 contributed data to our analysis than the 133·861 participants previously) <sup>9</sup>.

12  
13 The evaluation of the association was complex as both IPV exposure and breastfeeding outcomes were measured in  
14 different ways and statistical analytic models had variation in confounder adjustment between studies. We included a  
15 proper quality assessment of included studies by a validated tool and a thorough evaluation of different outcome  
16 measures. We minimized the risk of error and subjectivity by duplicate assessment. Our conclusion is subject to the  
17 proviso that the majority of studies were cross-sectional in design, so a causal association cannot be inferred <sup>34</sup>. The  
18 limitation of this systematic review reflects a weakness in the underlying evidence not in the robustness of reviewing.  
19 We reported the review complying with as many of the PRISMA <sup>10</sup> and MOOSE <sup>11</sup> guideline statements as possible.  
20 Our approach to making transparent these variations in evidence merits consideration as a strength of the review and  
21 we objectively exposed the complexity of the topic.  
22  
23  
24  
25  
26

### 27 **Interpretation of findings**

28  
29 Comparing our results with a previous review <sup>9</sup>, we found that our synthesis was more comprehensive considering the  
30 adjustment of a full range of confounders for analysis of the IPV-breastfeeding relationship. Some covariates may be  
31 part of the causal pathway of the association between violence and breastfeeding, hence they are not true confounders  
32 and therefore make considerations regarding confounding factors important. A key finding of this review is that most  
33 studies did not state their reasons for choice of confounders and there seems to be lack of consensus in the  
34 identification of potential confounders. For instance, depression is one variable that can both be identified as a  
35 confounder, or an intermediate variable in the causal pathway. Another important confounder is childhood abuse, yet  
36 only two studies have adjusted for childhood abuse in their statistical calculations with contradictory results <sup>15,18</sup>. Thus  
37 the association of only experiencing violence in pregnancy may be overestimated as there is evidence that  
38 victimization as a young child increases the risk of further victimization later in life <sup>35</sup> and also increases risk of  
39 breastfeeding difficulties when becoming a mother <sup>36,37</sup>. It is likely that there is no specific type of violence that causes  
40 revictimization of women and different types of violence often coexist <sup>1-3</sup>.  
41  
42  
43  
44  
45  
46

47  
48 Our review excluded studies with women exposed to lifetime history of violence in general and childhood abuse,  
49 whereas previous review included this population of women. However, most studies included only women who were  
50 interviewed about violence in relation to pregnancy, while childhood experiences of violence were not addressed.  
51 This can potentially change the target population, from women having no experiences of violence in childhood to a  
52 population of women with experiences of childhood abuse, mixed with women experiencing IPV in relation to  
53 pregnancy or women experiencing both types of violence and consequently change the association between IPV and  
54 breastfeeding practices. Another factor that can potentially affect the estimate is recall bias. Women are primarily  
55 interviewed about exposure of IPV in relation to pregnancy in the postpartum period, which can potentially introduce  
56  
57  
58  
59  
60

1  
2  
3  
4 recall bias. Reasons for that can be, if women do not remember or want to remember when they were exposed to  
5 violence.  
6  
7

8 Further, exclusive breastfeeding is often referred to as the most favourable feeding of infants, because of  
9 recommendations and studies of benefits from breast milk. These recommendations may influence the reporting  
10 because of this ideal and hence have an impact of mothers' retrospective recall, when breastfeeding is strongly  
11 correlated to the feeling of being a mother. As a result, both outcomes, but also exposure are difficult to measure when  
12 biased by strong feelings of parenthood, which can cause reporting biases. Moreover, women exposed to violence are  
13 often under reported<sup>38</sup>. This might as well be the same case for pregnant women and reasons for underreporting could  
14 be caused by protection of themselves and the perpetrator or completely refusing to participate in the study compared  
15 to women without violence experiences and consequently affecting the association.  
16  
17  
18  
19  
20  
21  
22  
23

## 24 **Conclusion**

25 This review established that the association between IPV and breastfeeding was complex and that the effect of  
26 exposure to IPV on breastfeeding practices was difficult to properly explore in a study-level data synthesis. The  
27 majority of studies in this review indicated that IPV exposure in pregnancy was associated with impaired  
28 breastfeeding, but still some studies found no association. Future research should focus on longitudinal studies in with  
29 robust designs, where women feel safe to offer information about violence and breastfeeding. As an interim step  
30 individual patient data meta-analysis<sup>39</sup>, by sharing raw data from existing studies and powerful reanalysis can make  
31 evidence synthesis more robust in this area.  
32  
33  
34  
35

## 36 **Funding**

37 All authors were financed through their institutions: Institute of Clinical Research, University of Southern Denmark  
38 (SDU), and Odense University Hospital (OUH). The funders had no role in developing the article.  
39  
40  
41  
42

## 43 **Declaration of interests**

44 DSL, AKN, AB, and KK had no conflict of interest. VR and FMK are co-authors of 1 study included in this review.  
45  
46

## 47 **Acknowledgements**

48 Research librarians, Lasse Østengaard and Peter Everfelt, for assistance in literature search. Professor Stella Martin-  
49 de-Las-Heras for providing an advanced copy of her paper for inclusion in our review.  
50  
51  
52

## 53 **Author statement:**

54 AKN and AB made the protocol and screened for eligible articles. AKN planned the data extraction, which was  
55 cross-checked and verified by FKM, as well as the quality assessment. Disagreement was solved through discussion.  
56 AKN designed to tables and wrote the first draft of the manuscript, which was reviewed by DSL, VR, KS and AB.  
57 All authors approved the final manuscript.  
58  
59  
60

## Supporting information

Following supplementary materials are available for this article (includes; tables, figures and appendix)

**Table 1: Characteristics of studies included in the review of the intimate partner violence and breastfeeding outcomes**

| Reference                               | Study design                           | Country           | Setting                                                                      | Sample size               | Age          | Tool to measure IPV                                    |
|-----------------------------------------|----------------------------------------|-------------------|------------------------------------------------------------------------------|---------------------------|--------------|--------------------------------------------------------|
| Madsen, 2019 <sup>32</sup>              | Cohort                                 | Tanzania          | Hospital                                                                     | 1128                      | 20-30        | Interview (from WHO multi-country study)               |
| Martin-de-las-Heras, 2018 <sup>33</sup> | Cohort                                 | Spain             | Antenatal care clinic                                                        | 718                       | >20-40+      | ISA <sup>A</sup>                                       |
| Miller-Graff, 2018 <sup>15</sup>        | Cohort                                 | The United States | WIC clinic (Women, infant and children clinic)                               | 69                        | 26.5 (mean)  | CTS <sup>B</sup>                                       |
| Tiwari, 2018 <sup>19</sup>              | Cross-sectional                        | India             | Household                                                                    | 26,587                    | 15-49        | CTS-2 <sup>B</sup>                                     |
| Wallenborn, 2018 <sup>20</sup>          | Cross-sectional                        | The United States | PRAMS (Pregnancy Risk Assessment Monitoring System)                          | 195,264                   | <20-35+      | Questionnaire                                          |
| Boyce, 2017 <sup>21</sup>               | Cross-sectional                        | India             | Household                                                                    | 10,469                    | 20-29        | Questionnaire                                          |
| Finnbogadottir, 2017 <sup>22</sup>      | Cross-sectional                        | Sweden            | Project: "Pregnant women and new mother's life experience"                   | 713                       | 30 (mean)    | Norvold Abuse Questionnaire                            |
| Holland, 2017 <sup>23</sup>             | Cross-sectional                        | The United States | PRAMS (Pregnancy Risk Assessment Monitoring System)                          | 760                       | 20-29        | Questionnaire (based on CDC's monitoring system)       |
| Hasselmann, 2016 <sup>17</sup>          | Cohort                                 | Brazil            | Primary health clinic                                                        | 564                       | <20-20+      | CTS-1 <sup>B</sup>                                     |
| Islam, 2016 <sup>24</sup>               | Cross-sectional                        | India             | Community based survey                                                       | 426                       | 14-25+       | Questionnaire (based on WHO demographic health survey) |
| Sørbo, 2015 <sup>18</sup>               | Cohort                                 | Norway            | MoBa (The Norwegian Mother and Child Cohort Study)                           | 53,934                    | 14-35+       | Norvold Abuse Questionnaire                            |
| James, 2014 <sup>25</sup>               | Cross-sectional (embedded from an RCT) | Australia         | MOVE (Improving maternal and child health nurse care for vulnerable mothers) | 2621                      | 15-35+       | CAS <sup>C</sup>                                       |
| Moraes, 2011 <sup>26</sup>              | Cross-sectional                        | Brazil            | Public Health Center                                                         | 811                       | <20-20+      | CTS-2 <sup>B</sup>                                     |
| Shroff, 2011 <sup>27</sup>              | Cross-sectional (embedded from an RCT) | India             | Household                                                                    | 600 (mother-infant pairs) | 22.14 (mean) | Questionnaire                                          |

|                                      |                 |                   |                                                     |         |         |                                     |
|--------------------------------------|-----------------|-------------------|-----------------------------------------------------|---------|---------|-------------------------------------|
| <b>Lau, 2007</b> <sup>28</sup>       | Cross-sectional | Hong Kong         | -                                                   | 1150    | <25-20+ | AAS <sup>D</sup> , CTS <sup>B</sup> |
| <b>Silverman, 2006</b> <sup>29</sup> | Cross-sectional | The United States | PRAMS (Pregnancy Risk Assessment Monitoring System) | 118,579 | <20-30+ | Questionnaire                       |

A: Index of Spouse Abuse, B: Conflict-Tactic Scale, C: Composite Abuse Scale, D: Abuse Assessment Screen

## References

1. Claudia Carcia-Moreno AG, Wendy Knerr. Understanding and addressing violence against women WHO; 2012. Report No.: WHO/RHR/12.36.
2. WHO. Violence against women 2017 [10.04.19]. Available from: <https://www.who.int/en/news-room/fact-sheets/detail/violence-against-women>
3. World Health Organization/London School of Hygiene and Tropical Medicine. Preventing intimate partner and sexual violence against women: taking action and generating evidence. Geneva. 2010. Report No.: 978 92 4 156400 7.
4. WHO. Intimate partner violence during pregnancy. Dept. of Reproductive Health and Research; 2011. Report No.: WHO/RHR/11.35.
5. Jasinski JL. Pregnancy and domestic violence: a review of the literature. *Trauma, violence & abuse*. 2004;5(1):47-64.
6. Sigalla GN, Mushi D, Meyrowitsch DW, Manongi R, Rogathi JJ, Gammeltoft T, et al. Intimate partner violence during pregnancy and its association with preterm birth and low birth weight in Tanzania: A prospective cohort study. *PLoS one*. 2017;12(2):e0172540.
7. Chowdhury AN, Ramakrishna J, Chakraborty AK, Weiss MG. Cultural context and impact of alcohol use in the Sundarban Delta, West Bengal, India. *Soc Sci Med*. 2006;63(3):722-31.
8. Misch E, Yount K. Intimate Partner Violence and Breastfeeding in Africa. *Maternal & Child Health Journal*. 2014;18(3):688-97.
9. Mezzavilla RDS, Ferreira MDF, Curioni CC, Lindsay AC, Hasselmann MH. Intimate partner violence and breastfeeding practices: a systematic review of observational studies. *Jornal de pediatria*. 2018;94(3):226-37.
10. Moher D, Liberati A, Tetzlaff J, Altman DG. Preferred reporting items for systematic reviews and meta-analyses: the PRISMA statement. *PLoS Med*. 2009;6(7):e1000097.
11. Stroup DF, Berlin JA, Morton SC, Olkin I, Williamson GD, Rennie D, et al. Meta-analysis of observational studies in epidemiology: a proposal for reporting. Meta-analysis Of Observational Studies in Epidemiology (MOOSE) group. *Jama*. 2000;283(15):2008-12.
12. WHO. Improving maternal, newborn, infant and young child health and nutrition 2013. Report No.: 978 92 4 150555 0.
13. Covidence systematic review software, Veritas Health Innovation, Melbourne, Australia. [25.02.19]. Available from: [www.covidence.org](http://www.covidence.org).
14. Martin-de-Las-Heras S, Velasco C, Luna-Del-Castillo JD, Khan KS. Breastfeeding avoidance following psychological intimate partner violence during pregnancy: a cohort study and multivariate analysis. *BJOG : an international journal of obstetrics and gynaecology*. 2019;126(6):778-83.
15. Miller-Graff LE, Ahmed AH, Paulson JL. Intimate Partner Violence and Breastfeeding Outcomes in a Sample of Low-Income Women. *Journal of human lactation : official journal of International Lactation Consultant Association*. 2018;34(3):494-502.
16. Kjerulff Madsen F, Holm-Larsen CE, Wu C, Rogathi J, Manongi R, Mushi D, et al. Intimate partner violence and subsequent premature termination of exclusive breastfeeding: A cohort study. *PLoS one*. 2019;14(6):e0217479.
17. Hasselmann MH, Lindsay AC, Surkan PJ, Vianna GV, Werneck GL. Intimate partner violence and early interruption of exclusive breastfeeding in the first three months of life. *Cadernos de saude publica*. 2016;32(10):e00017816.
18. Sorbo MF, Lukasse M, Brantsaeter AL, Grimstad H. Past and recent abuse is associated with early cessation of breast feeding: results from a large prospective cohort in Norway. *BMJ open*. 2015;5(12):e009240.

- 1  
2  
3  
4 19. Tiwari S, Gray R, Jenkinson C, Carson C. Association between spousal emotional abuse and reproductive outcomes of women in  
5 India: findings from cross-sectional analysis of the 2005-2006 National Family Health Survey. *Social psychiatry and psychiatric epidemiology*.  
6 2018;53(5):509-19.
- 7 20. Wallenborn JT, Cha S, Masho SW. Association Between Intimate Partner Violence and Breastfeeding Duration: Results From  
8 the 2004-2014 Pregnancy Risk Assessment Monitoring System. *Journal of human lactation : official journal of International Lactation Consultant*  
9 *Association*. 2018;34(2):233-41.
- 10 21. Boyce SC, McDougal L, Silverman JG, Atmavilas Y, Dhar D, Hay K, et al. Associations of intimate partner violence with  
11 postnatal health practices in Bihar, India. *BMC pregnancy and childbirth*. 2017;17(1):398.
- 12 22. Finnbogadottir H, Thies-Lagergren L. Breastfeeding in the context of domestic violence-a cross-sectional study. *Journal of*  
13 *advanced nursing*. 2017;73(12):3209-19.
- 14 23. Holland ML, Thevenent-Morrison K, Mittal M, Nelson A, Dozier AM. Breastfeeding and Exposure to Past, Current, and  
15 Neighborhood Violence. *Maternal and child health journal*. 2018;22(1):82-91.
- 16 24. Islam M, Baird K, Mazerolle P, Brody L. Exploring the influence of psychosocial factors on exclusive breastfeeding in  
17 Bangladesh. *Archives of women's mental health*. 2017;20(1):173-88.
- 18 25. James JP, Taft A, Amir LH, Agius P. Does intimate partner violence impact on women's initiation and duration of breastfeeding?  
19 Breastfeeding review : professional publication of the Nursing Mothers' Association of Australia. 2014;22(2):11-9.
- 20 26. Moraes CL, de Oliveira AS, Reichenheim ME, Lobato G. Severe physical violence between intimate partners during pregnancy:  
21 a risk factor for early cessation of exclusive breast-feeding. *Public health nutrition*. 2011;14(12):2148-55.
- 22 27. Shroff MR, Griffiths PL, Suchindran C, Nagalla B, Vazir S, Bentley ME. Does maternal autonomy influence feeding practices  
23 and infant growth in rural India? *Social science & medicine (1982)*. 2011;73(3):447-55.
- 24 28. Lau Y, Chan KS. Influence of intimate partner violence during pregnancy and early postpartum depressive symptoms on  
25 breastfeeding among chinese women in Hong Kong. *Journal of midwifery & women's health*. 2007;52(2):e15-e20.
- 26 29. Silverman JG, Decker MR, Reed E, Raj A. Intimate partner violence around the time of pregnancy: association with  
27 breastfeeding behavior. *Journal of women's health (2002)*. 2006;15(8):934-40.
- 28 30. Coomarasamy A, Khan KS. What is the evidence that postgraduate teaching in evidence based medicine changes anything? A  
29 systematic review. *Bmj*. 2004;329(7473):1017.
- 30 31. ter Riet G, Kleijnen J, Knipschild P. Acupuncture and chronic pain: a criteria-based meta-analysis. *J Clin Epidemiol*.  
31 1990;43(11):1191-9.
- 32 32. Madsen FK, Holm-Larsen C.E., W., Chunsen, Rogathi, J., Manongi, R., Mushi, D., Meyrowitsch, D. W., Gammeltoft, T., Sigalla,  
33 G. N., Rasch, V. . Intimate partner violence and subsequent premature termination of exclusive breastfeeding: A cohort study. *PLOS ONE* (in press)  
34 2019.
- 35 33. Martin-de-Las-Heras S, Velasco C, Luna-Del-Castillo JD, Khan KS. Breastfeeding avoidance following psychological intimate  
36 partner violence during pregnancy: a cohort study and multivariate analysis. *BJOG : an international journal of obstetrics and gynaecology*. 2018.
- 37 34. Khan KS, Ball E, Fox CE, Meads C. Systematic reviews to evaluate causation: an overview of methods and application. *Evid*  
38 *Based Med*. 2012;17(5):137-41.
- 39 35. Widom CS, Czaja SJ, Dutton MA. Childhood victimization and lifetime revictimization. *Child abuse & neglect*. 2008;32(8):785-  
40 96.
- 41 36. Elfgén C, Hagenbuch N, Gorres G, Block E, Leeners B. Breastfeeding in Women Having Experienced Childhood Sexual Abuse.  
42 *Journal of human lactation : official journal of International Lactation Consultant Association*. 2017;33(1):119-27.
- 43 37. Eagen-Torkko M, Low LK, Zielinski R, Seng JS. Prevalence and Predictors of Breastfeeding After Childhood Abuse. *Journal of*  
44 *obstetric, gynecologic, and neonatal nursing : JOGNN*. 2017;46(3):465-79.
- 45 38. Gracia E. Unreported cases of domestic violence against women: towards an epidemiology of social silence, tolerance, and  
46 inhibition. *J Epidemiol Community Health*. 2004;58(7):536-7.
- 47 39. Rogozinska E, Marlin N, Thangaratnam S, Khan KS, Zamora J. Meta-analysis using individual participant data from randomised  
48 trials: opportunities and limitations created by access to raw data. *Evid Based Med*. 2017;22(5):157-62.
- 49  
50  
51  
52  
53  
54  
55  
56  
57  
58  
59  
60

## Appendix, S1: Search strategy

Embase search: Searched on the 11<sup>th</sup> of March with a total result of 1382 articles

| #ID | Search                                                                                                                                                                                                                             |
|-----|------------------------------------------------------------------------------------------------------------------------------------------------------------------------------------------------------------------------------------|
| 1   | Exp partner violence/                                                                                                                                                                                                              |
| 2   | Exp domestic violence/                                                                                                                                                                                                             |
| 3   | Exp physical abuse/                                                                                                                                                                                                                |
| 4   | Exp battered woman/                                                                                                                                                                                                                |
| 5   | Exp breast feeding/                                                                                                                                                                                                                |
| 6   | Exp breast milk expression/                                                                                                                                                                                                        |
| 7   | Exp feeding behavior                                                                                                                                                                                                               |
| 8   | Exp lactation                                                                                                                                                                                                                      |
| 9   | Exp milk ejection                                                                                                                                                                                                                  |
| 10  | "intimate partner violence"                                                                                                                                                                                                        |
| 11  | "dating violence"                                                                                                                                                                                                                  |
| 12  | "partner violence"                                                                                                                                                                                                                 |
| 13  | "partner homicide"                                                                                                                                                                                                                 |
| 14  | "psychological violence"                                                                                                                                                                                                           |
| 15  | "psychological abuse"                                                                                                                                                                                                              |
| 16  | "spouse abuse"                                                                                                                                                                                                                     |
| 17  | "spousal abuse"                                                                                                                                                                                                                    |
| 18  | "wife abuse"                                                                                                                                                                                                                       |
| 19  | "partner abuse"                                                                                                                                                                                                                    |
| 20  | "domestic violence"                                                                                                                                                                                                                |
| 21  | "family violence"                                                                                                                                                                                                                  |
| 22  | "physical abuse"                                                                                                                                                                                                                   |
| 23  | "physical violence"                                                                                                                                                                                                                |
| 24  | "physical maltreatment"                                                                                                                                                                                                            |
| 25  | "sex offenses"                                                                                                                                                                                                                     |
| 26  | "sexual violence"                                                                                                                                                                                                                  |
| 27  | "sexual harm"                                                                                                                                                                                                                      |
| 28  | "sexual coercion"                                                                                                                                                                                                                  |
| 29  | "battered woman"                                                                                                                                                                                                                   |
| 30  | "battered women"                                                                                                                                                                                                                   |
| 31  | "abused women"                                                                                                                                                                                                                     |
| 32  | "abused woman"                                                                                                                                                                                                                     |
| 33  | "relationship violence"                                                                                                                                                                                                            |
| 34  | "relationship aggression"                                                                                                                                                                                                          |
| 35  | "couple violence"                                                                                                                                                                                                                  |
| 36  | "spousal violence"                                                                                                                                                                                                                 |
| 37  | "domestic abuse"                                                                                                                                                                                                                   |
| 38  | "wife beating"                                                                                                                                                                                                                     |
| 39  | "physical harm"                                                                                                                                                                                                                    |
| 40  | "physical aggression"                                                                                                                                                                                                              |
| 41  | "emotional violence"                                                                                                                                                                                                               |
| 42  | "emotional abuse"                                                                                                                                                                                                                  |
| 43  | "emotional harm"                                                                                                                                                                                                                   |
| 44  | "violence against women"                                                                                                                                                                                                           |
| 45  | 1 or 2 or 3 or 4 or 10 or 11 or 12 or 13 or 14 or 15 or 16 or 17 or 18 or 19 or 20 or 21 or 22 or 23 or 24 or 25 or 26 or 27 or 28 or 29 or 30 or 31 or 32 or 33 or 34 or 35 or 36 or 37 or 38 or 39 or 40 or 41 or 42 or 43 or 44 |
| 46  | Exp sexual abuse                                                                                                                                                                                                                   |
| 47  | Controlling behavior                                                                                                                                                                                                               |
| 48  | 45 or 46 or 47                                                                                                                                                                                                                     |
| 49  | "sexual abuse"                                                                                                                                                                                                                     |
| 50  | 48 or 49                                                                                                                                                                                                                           |
| 51  | "exclusive breastfeeding"                                                                                                                                                                                                          |
| 52  | "breastfeeding duration"                                                                                                                                                                                                           |
| 53  | "breastfeeding intention"                                                                                                                                                                                                          |
| 54  | "pumping breast"                                                                                                                                                                                                                   |
| 55  | "human milk"                                                                                                                                                                                                                       |
| 56  | "breast milk"                                                                                                                                                                                                                      |
| 57  | "milk secretion"                                                                                                                                                                                                                   |
| 58  | "milk let-down"                                                                                                                                                                                                                    |
| 59  | 5 or 6 or 7 or 8 or 51 or 52 or 53 or 54 or 55 or 57 or 58                                                                                                                                                                         |
| 60  | Feeding behavior                                                                                                                                                                                                                   |
| 61  | Feeding pattern                                                                                                                                                                                                                    |
| 62  | "feeding patterns"                                                                                                                                                                                                                 |



|    |                                                                      |
|----|----------------------------------------------------------------------|
| 63 | 59 or 60 or 61 or 62                                                 |
| 64 | Feeding behaviors                                                    |
| 65 | 63 or 64                                                             |
| 66 | "exclusive breast feeding"                                           |
| 67 | "exclusive breast feedings"                                          |
| 68 | "breast feedings"                                                    |
| 69 | "breast feeding"                                                     |
| 70 | "breastmilk expression"                                              |
| 71 | "breastmilk expressions"                                             |
| 72 | "milk collection"                                                    |
| 73 | "milk collections"                                                   |
| 74 | "breast pumping"                                                     |
| 75 | "milk secretion"                                                     |
| 76 | "milk secretions"                                                    |
| 77 | 65 or 66 or 67 or 68 or 69 or 70 or 71 or 72 or 73 or 74 or 75 or 76 |
| 78 | Lactations                                                           |
| 79 | Lactation                                                            |
| 80 | 77 or 78 or 79                                                       |
| 81 | 50 and 80                                                            |

**Global Health Library search: Searched on the 12<sup>th</sup> of March with a total result of 91 articles**

| #ID | Search                                                                                                                                                                            |
|-----|-----------------------------------------------------------------------------------------------------------------------------------------------------------------------------------|
| S1  | "intimate partner violence" OR "dating violence" OR "partner violence" OR "partner homicide" OR "psychological abuse" OR "psychological violence"                                 |
| S2  | "spouse abuse" OR "spousal abuse" OR "wife abuse" OR "partner abuse"                                                                                                              |
| S3  | S3 OR S2                                                                                                                                                                          |
| S4  | "domestic violence" OR "family violence"                                                                                                                                          |
| S5  | S4 OR S3                                                                                                                                                                          |
| S6  | "physical abuse" OR "physical violence" OR "physical maltreatment"                                                                                                                |
| S7  | S6 OR S5                                                                                                                                                                          |
| S8  | "sexual assault" OR "sex offenses" OR "sexual violence" OR "sexual abuse" OR "sexual harm" OR "sexual coercion"                                                                   |
| S9  | S8 OR S7                                                                                                                                                                          |
| S10 | "battered woman" OR "battered women" OR "abused woman" OR "abused women"                                                                                                          |
| S11 | S10 OR S9                                                                                                                                                                         |
| S12 | "relationship violence" OR "relationship aggression" OR "couple violence" OR "spousal violence" OR "domestic abuse" OR "wife beating" OR "physical harm" OR "physical aggression" |
| S13 | S12 OR S11                                                                                                                                                                        |
| S14 | "emotional violence" OR "emotional abuse" OR "emotional harm" OR "controlling behaviour" OR "violence against women"                                                              |
| S15 | S14 OR S13                                                                                                                                                                        |
| S16 | "breast feeding" OR "breastfeeding" OR "exclusive breast feeding" OR "exclusive breastfeeding" OR "breastfeeding duration" OR "breastfeeding intention"                           |
| S17 | "breast milk expression" OR "breast milk expressions" OR "milk collection" OR "milk collections" OR "breast pumping" OR "pumping breast"                                          |
| S18 | S17 OR S16                                                                                                                                                                        |
| S19 | "feeding behaviour" OR "feeding behaviors" OR "feeding pattern" OR "feeding patterns" OR "human milk" OR "milk, human"                                                            |
| S20 | S19 OR S18                                                                                                                                                                        |
| S21 | Lactation OR lactations OR "milk secretion" OR "milk secretions" OR "milk ejection" OR "milk let-down"                                                                            |
| S22 | S21 OR S20                                                                                                                                                                        |
| S23 | S22 AND S15                                                                                                                                                                       |

**PubMed search: Searched on the 8<sup>th</sup> of March with a total result of 253 articles**

((((((((((("Breast Feeding"[Mesh]) OR breastfeeding) OR exclusive breast fe\*) OR "exclusive breastfeeding") OR "breastfeeding duration") OR breast fe\*) OR "breastfeeding intention")) OR (((("Breast Milk Expression"[Mesh]) OR breast milk expression\*) OR breastmilk expression\*) OR milk collection\*) OR breast pumping\*) OR "pumping breast")) OR (((("Feeding Behavior"[Mesh]) OR feeding behavior\*) OR feeding pattern\*)) OR ((("Milk, Human"[Mesh]) OR "human milk")) OR (((("Lactation"[Mesh]) OR milk secretion\*) OR lactation\*)) OR ((("Milk Ejection"[Mesh]) OR "milk let-down")))) AND (((((((((((("relationship violence") OR "relationship aggression") OR "couple violence")



OR "spousal violence") OR "domestic abuse") OR "wife beating") OR "physical harm") OR "physical aggression") OR "emotional violence") OR "emotional abuse") OR "emotional harm") OR controlling behavior\*) OR "violence against women") OR (((("Battered Women"[Mesh]) OR "Battered Woman") OR "abused women") OR "abused woman")) OR (((("Sex Offenses"[Mesh]) OR "sex offenses") OR "sexual violence") OR sexual abuse\*) OR "sexual harm") OR "sexual coercion") OR (((("Physical Abuse"[Mesh]) OR "physical abuse") OR "physical violence") OR "physical maltreatment")) OR (((("Domestic Violence"[Mesh]) OR "domestic violence") OR "family violence")) OR (((("Spouse Abuse"[Mesh]) OR "spouse abuse") OR "spousal abuse") OR "wife abuse") OR "partner abuse")) OR (((("Intimate Partner Violence"[Mesh]) OR "intimate partner violence") OR "dating violence") OR "partner violence") OR "partner homicide") OR "psychological violence") OR "psychological abuse"))

#### SCOPUS: Searched on the 11<sup>th</sup> of March with a total result of 257 articles

(((((TITLE-ABS-KEY("breast feeding")) OR (TITLE-ABS-KEY("breastfeeding intention")))) OR ((TITLE-ABS-KEY(breastfeeding)) OR (TITLE-ABS-KEY("breastfeeding duration" ))) OR ((TITLE-ABS-KEY("exclusive breast feeding" )) OR (TITLE-ABS-KEY("exclusive breastfeeding" )))) OR ((TITLE-ABS-KEY("breast milk expression")) OR (TITLE-ABS-KEY("breast milk expressions" )) OR (TITLE-ABS-KEY("breastmilk expression" )) OR (TITLE-ABS-KEY("breastmilk expressions")) OR (TITLE-ABS-KEY("milk collections" )) OR (TITLE-ABS-KEY("milk collection")) OR (TITLE-ABS-KEY("breast pumping" )) OR (TITLE-ABS-KEY("pumping breast")))) OR ((TITLE-ABS-KEY("feeding behavior" )) OR (TITLE-ABS-KEY("feeding pattern")) OR (TITLE-ABS-KEY("human milk" )) OR (TITLE-ABS-KEY("milk, human")) OR (TITLE-ABS-KEY("breast milk")))) OR ((TITLE-ABS-KEY(lactation)) OR (TITLE-ABS-KEY("milk secretion" )) OR (TITLE-ABS-KEY("milk ejection")) OR (TITLE-ABS-KEY("milk let-down")))) AND (((TITLE-ABS-KEY("intimate partner violence")) OR (TITLE-ABS-KEY("dating violence" ))) OR (TITLE-ABS-KEY("partner violence" )) OR (TITLE-ABS-KEY("partner homicide")) OR (TITLE-ABS-KEY("psychological violence" )) OR (TITLE-ABS-KEY("psychological abuse" ))) OR (((TITLE-ABS-KEY("spouse abuse")) OR (TITLE-ABS-KEY("spousal abuse" ))) OR (TITLE-ABS-KEY("wife abuse" )) OR (TITLE-ABS-KEY("partner abuse" ))) OR ((TITLE-ABS-KEY("domestic violence" )) OR (TITLE-ABS-KEY("family violence" )) OR (TITLE-ABS-KEY("physical abuse" )) OR (TITLE-ABS-KEY("physical violence" )) OR (TITLE-ABS-KEY("physical maltreatment")))) OR ((TITLE-ABS-KEY("sex offenses" )) OR (TITLE-ABS-KEY("sexual violence")) OR (TITLE-ABS-KEY("sexual abuse")) (TITLE-ABS-KEY("sexual harm" )) OR (TITLE-ABS-KEY("sexual coercion" ))) OR (((TITLE-ABS-KEY("battered women" )) OR (TITLE-ABS-KEY("battered woman")) OR ((TITLE-ABS-KEY("abused woman" )) OR (TITLE-ABS-KEY("abused women")))) OR (((TITLE-ABS-KEY("relationship aggression")) OR (TITLE-ABS-KEY("couple violence" ))) OR (TITLE-ABS-KEY("relationship violence" ))) OR (TITLE-ABS-KEY("spousal violence")) OR ((TITLE-ABS-KEY("domestic violence" )) OR (TITLE-ABS-KEY("wife beating" )) OR (TITLE-ABS-KEY("physical harm" )) OR (TITLE-ABS-KEY("physical aggression" ))) OR ((TITLE-ABS-KEY("emotional violence" )) OR (TITLE-ABS-KEY("emotional abuse")) OR (TITLE-ABS-KEY("emotional harm")) OR (TITLE-ABS-KEY("controlling behavior" ))) OR (TITLE-ABS-KEY("violence against women" )))

#### Appendix, S2: Data synthesis tables

**Table S2.1: Confounders adjusted for in studies**

| Reference                               | Domain  |                                          |                                        |                            |                       |                              |                                     |                                   |                     |                    |
|-----------------------------------------|---------|------------------------------------------|----------------------------------------|----------------------------|-----------------------|------------------------------|-------------------------------------|-----------------------------------|---------------------|--------------------|
|                                         | Economy | Maternal life style and health lifestyle | Pregnancy/post partum related problems | Maternal socio-demographic | Child characteristics | Relationship characteristics | Support during pregnancy/postpartum | Violence or stressful life events | Pregnancy intention | Caste and religion |
| Madsen, 2019 <sup>32</sup>              |         | x                                        |                                        | x                          |                       |                              |                                     |                                   |                     |                    |
| Martin-de-las-Heras, 2018 <sup>33</sup> |         | x                                        | x                                      | x                          |                       | x                            | x                                   |                                   | x                   |                    |
| Miller-Graff, 2018 <sup>15</sup>        | x       |                                          | x                                      |                            |                       |                              | x                                   | x                                 |                     |                    |

|                                    |    |    |    |    |    |    |    |    |    |    |
|------------------------------------|----|----|----|----|----|----|----|----|----|----|
| Tiwari, 2018 <sup>19</sup>         | x  |    |    | x  |    | x  |    | x  |    | x  |
| Wallenborn, 2018 <sup>20</sup>     | x  |    |    | x  |    | x  |    | x  | x  |    |
| Boyce, 2017* <sup>21</sup>         |    |    |    |    |    |    |    |    |    |    |
| Finnbogadottir, 2017 <sup>22</sup> | NA |
| Holland, 2017 <sup>23</sup>        |    | x  | x  | x  |    |    |    | x  |    |    |
| Hasselmann, 2016 <sup>17</sup>     |    |    |    | x  | x  | x  |    |    |    |    |
| Islam, 2016 <sup>24</sup>          | x  | x  | x  | x  | x  | x  | x  | x  | x  |    |
| Sørbo, 2015 <sup>18</sup>          |    |    |    | x  |    | x  |    | x  |    |    |
| James, 2014 <sup>25</sup>          | x  |    | x  | x  |    |    |    |    |    |    |
| Moraes, 2011 <sup>26</sup>         |    | x  |    | x  | x  |    | x  |    |    |    |
| Shroff, 2011 <sup>27</sup>         |    | x  |    | x  | x  | x  |    |    |    | x  |
| Lau, 2007 <sup>28</sup>            |    | x  | x  | x  |    | x  |    |    | x  |    |
| Silverman, 2006 <sup>29</sup>      |    | x  |    | x  |    | x  |    |    |    |    |

\*Article states that the association between IPV and BF was adjusting for any covariate that were significant at  $p < 0,20$  levels in bivariate analysis, but results not shown

NA (not applicable)

**Explanation of following groups of confounders:**

Economy: Insurance and receipt of government assistance

Maternal life style and health: Smoking, substance use prior to pregnancy, substance use all time, maternal health status, mothers BMI, HIV status

Pregnancy and postpartum related problems: Pregnancy health problems, preterm labor, mode of birth, complications during birth, mother/infant separation after birth, antenatal complications, postnatal complications, reasons for stopping BF and resuscitation

Maternal sociodemographic: Maternal age, maternal education, maternal race/ethnicity, first baby/number of the child, employment status, place of residence, parity, occupation, number of years lived in the U.S and language

Child characteristics: Gender of child, age of child, low birthweight/birth weight, child health

Relationship characteristics: Marital status, relationship characteristics, partner's education level, family structure, cohabitation

Support during pregnancy and postpartum: Prenatal BF education, number of antenatal care visits/health care services, kin support, social support, type of maternity clinic

Violence or stressful life events: Stressful live events 12 months before pregnancy, depression childhood abuse, other forms of IPV

Pregnancy intention

Caste and religion

**Table S2.2: Results of NOS quality assessment**

| Cohort studies |                             |                                 |                           |              |                           |
|----------------|-----------------------------|---------------------------------|---------------------------|--------------|---------------------------|
|                | Selection (maximum 4 stars) | Comparability (maximum 2 stars) | Outcome (maximum 3 stars) | No. of stars | No. of stars with domains |
|                |                             |                                 |                           |              |                           |

| Study                             | Representativeness of the exposed cohort | Selection of the non-exposed cohort | Ascertainment of exposure | Demonstration that outcome of interest was not present at start of study | Comparability of cohorts on the basis of the design or analysis                                                                    | Confounding domains adjusted for (table 5) | Assessment of outcome            | Was follow-up long enough for outcomes to occur | Adequacy of follow up of cohorts |                     | adjusted for |
|-----------------------------------|------------------------------------------|-------------------------------------|---------------------------|--------------------------------------------------------------------------|------------------------------------------------------------------------------------------------------------------------------------|--------------------------------------------|----------------------------------|-------------------------------------------------|----------------------------------|---------------------|--------------|
| Madsen, 2019                      | *                                        | *                                   | *                         | *                                                                        | **                                                                                                                                 | **                                         | -                                | *                                               | *                                | 8                   | 10           |
| Martin-de-las-heras, 2018         | *                                        | *                                   | *                         | *                                                                        | **                                                                                                                                 | *****                                      | -                                | -                                               | -                                | 6                   | 12           |
| Miller-Graff, 2018                | -                                        | *                                   | *                         | *                                                                        | **                                                                                                                                 | ****                                       | -                                | *                                               | *                                | 7                   | 11           |
| Finnbogadottir, 2017 <sup>A</sup> | *                                        | *                                   | -                         | *                                                                        | -                                                                                                                                  | -                                          | -                                | *                                               | -                                | 4                   | 4            |
| Hasselmann, 2016                  | *                                        | *                                   | *                         | -                                                                        | -                                                                                                                                  | ***                                        | -                                | *                                               | -                                | 4                   | 7            |
| Sørbo, 2015                       | *                                        | *                                   | -                         | *                                                                        | **                                                                                                                                 | ***                                        | -                                | *                                               | -                                | 6                   | 9            |
| <b>Cross-sectional studies</b>    |                                          |                                     |                           |                                                                          |                                                                                                                                    |                                            |                                  |                                                 |                                  |                     |              |
|                                   | <b>Selection (maximum 5 stars)</b>       |                                     |                           |                                                                          | <b>Comparability (maximum 2 stars)</b>                                                                                             |                                            | <b>Outcome (maximum 3 stars)</b> |                                                 |                                  | <b>No. of stars</b> |              |
| Study                             | Representativeness of the sample         | Sample size                         | Non-respondents           | Ascertainment of the exposure (risk factor)                              | The subjects in different outcome groups are comparable, based on the study design or analysis. Confounding factors are controlled | Confounding domains adjusted for (table 5) | Assessment of outcome            | Statistical test                                |                                  |                     |              |
| Tiwari, 2018                      | *                                        | *                                   | *                         | **                                                                       | *                                                                                                                                  | ****                                       | *                                | *                                               |                                  | 8                   | 12           |
| Wallenborn, 2018                  | *                                        | *                                   | -                         | **                                                                       | *                                                                                                                                  | *****                                      | *                                | *                                               |                                  | 7                   | 12           |
| Boyce, 2017                       | *                                        | *                                   | *                         | **                                                                       | -                                                                                                                                  | -                                          | *                                | *                                               |                                  | 7                   | 7            |
| Holland, 2017                     | -                                        | -                                   | -                         | *                                                                        | -                                                                                                                                  | ****                                       | *                                | *                                               |                                  | 3                   | 7            |
| Islam, 2016                       | *                                        | -                                   | *                         | *                                                                        | **                                                                                                                                 | *****<br>*                                 | *                                | *                                               |                                  | 7                   | 16           |
| James, 2014                       | -                                        | -                                   | -                         | **                                                                       | -                                                                                                                                  | ***                                        | *                                | *                                               |                                  | 4                   | 7            |
| Moraes, 2011                      | *                                        | -                                   | *                         | **                                                                       | **                                                                                                                                 | ****                                       | *                                | *                                               |                                  | 8                   | 12           |
| Shroff, 2011                      | -                                        | -                                   | -                         | *                                                                        | -                                                                                                                                  | *****                                      | *                                | *                                               |                                  | 3                   | 8            |
| Lau, 2007                         | *                                        | *                                   | *                         | **                                                                       | -                                                                                                                                  | *****                                      | *                                | *                                               |                                  | 7                   | 12           |
| Silverman, 2006                   | *                                        | *                                   | *                         | *                                                                        | -                                                                                                                                  | ***                                        | *                                | *                                               |                                  | 6                   | 9            |

<sup>A</sup> Cross-sectional study embedded from a cohort. Analyzed with NOS for cohort.

**Table S2.3: Early cessation/shortened duration of breastfeeding (aOR; 95% CI) vs. no cessation of breastfeeding**

| Reference                               | Exposed to IPV* prior to pregnancy                                                      | Exposed to IPV* during pregnancy/post-partum | Exposed to any IPV** prior to pregnancy                                                                                                                                                                                                                                                    | Exposed to any IPV** during pregnancy/post-partum |
|-----------------------------------------|-----------------------------------------------------------------------------------------|----------------------------------------------|--------------------------------------------------------------------------------------------------------------------------------------------------------------------------------------------------------------------------------------------------------------------------------------------|---------------------------------------------------|
| Madsen, 2019 <sup>32</sup>              | NA                                                                                      | NA                                           | NA                                                                                                                                                                                                                                                                                         | NA                                                |
| Martin-de-las-Heras, 2018 <sup>33</sup> | NA                                                                                      | NA                                           | NA                                                                                                                                                                                                                                                                                         | NA                                                |
| Miller-Graff, 2018 <sup>15</sup>        | P + E + S: 0.22 (0.05-0.85) <sup>A</sup>                                                |                                              |                                                                                                                                                                                                                                                                                            |                                                   |
| Tiwari, 2018 <sup>19</sup>              | E: 1.07 (0.81-1.41) <sup>B</sup>                                                        |                                              |                                                                                                                                                                                                                                                                                            |                                                   |
| Wallenborn, 2018 <sup>20</sup>          | P: 1.18 (1.01-1.37)                                                                     | P: 1.15 (0.94-1.4)                           | NA                                                                                                                                                                                                                                                                                         | NA                                                |
|                                         | P: 1.03 (0.89-1.19)                                                                     |                                              | NA                                                                                                                                                                                                                                                                                         | NA                                                |
| Boyce, 2017 <sup>21</sup>               | NA                                                                                      |                                              | NA                                                                                                                                                                                                                                                                                         |                                                   |
| Finnbogadottir, 2017 <sup>22</sup>      | NA                                                                                      | NA                                           | NA                                                                                                                                                                                                                                                                                         | NA                                                |
| Holland, 2017 <sup>23</sup>             | NA                                                                                      | NA                                           | P + E + S: 5.92 (1.72-27.98) <sup>C,D,F</sup><br>P + E + S: 3.33 (1.46-8) <sup>C,E,F</sup><br>P + E + S: 0.66 (0.25-1.59) <sup>C,D,G</sup><br>P + E + S: 0.93 (0.54-1.58) <sup>C,E,G</sup><br>P + E + S: 0.68 (0.25-1.72) <sup>C,D,H</sup><br>P + E + S: 0.87 (0.44-1.68) <sup>C,E,H</sup> |                                                   |
| Hasselmann, 2016 <sup>17</sup>          | NA                                                                                      |                                              |                                                                                                                                                                                                                                                                                            |                                                   |
| Islam, 2016 <sup>24</sup>               | NA                                                                                      | NA                                           | NA                                                                                                                                                                                                                                                                                         | NA                                                |
| Sørbo, 2015 <sup>18</sup>               | P: 0.96 (0.73-1.25)<br>E: 1.28 (1.18-1.39)<br>S: 0.94 (0.76-1.16)                       |                                              | P + E + S: 1.47 (1.23-1.76)<br>P + E: 1.39 (1.18-1.39)<br>P + S: 0.95 (0.61-1.47)<br>S + E: 1.27 (1.02-1.58)                                                                                                                                                                               |                                                   |
| James, 2014 <sup>25</sup>               | P + E + S: 1.25 (0.85-1.84) <sup>I,J</sup><br>P + E + S: 1.01 (0.8-1.29) <sup>I,K</sup> |                                              |                                                                                                                                                                                                                                                                                            |                                                   |
| Moraes, 2011 <sup>26</sup>              | NA                                                                                      | NA                                           | NA                                                                                                                                                                                                                                                                                         | NA                                                |
| Shroff, 2011 <sup>27</sup>              | NA                                                                                      | NA                                           | NA                                                                                                                                                                                                                                                                                         | NA                                                |
| Lau, 2007 <sup>28</sup>                 | NA                                                                                      | NA                                           | NA                                                                                                                                                                                                                                                                                         | NA                                                |
| Silverman, 2006 <sup>29</sup>           | NA                                                                                      | NA                                           | P + E: 0.94 (0.76-1.7)                                                                                                                                                                                                                                                                     | P + E: 0.97 (0.72-1.3)                            |
|                                         | NA                                                                                      | NA                                           | P + E: 1.05 (0.86-1.3)                                                                                                                                                                                                                                                                     |                                                   |

NA (not applicable)

\* IPV measured as physical (P), or emotional (E) or sexual (S)

\*\* IPV measured as physical (P), emotional/psychological/mental (M) and sexual (S) combined

<sup>A</sup> Crude OR (measured as effect of IPV exposure the past year and interpreted as lower likelihood of continuing BF)

<sup>B</sup> At least one month of BF

<sup>C</sup> HR interpreted as the probability of stopping BF

<sup>D</sup> Duration at 4 weeks

<sup>E</sup> Duration at 13 weeks

<sup>F</sup> White women

<sup>G</sup> Black women

<sup>H</sup> Hispanic women

<sup>I</sup> Interpreted as likelihood of BF at the time measured

<sup>J</sup> BF at 3 months

<sup>K</sup> BF at 6 months

**Table S2.4: Initiation of breastfeeding (aOR; 95% CI) vs. no initiation of breastfeeding**

| Reference                                  | Exposed to IPV*<br>prior to<br>pregnancy                             | Exposed to IPV*<br>during<br>pregnancy/post-<br>partum       | Exposed to any IPV**<br>prior to pregnancy                                                                                    | Exposed to any IPV** during<br>pregnancy/post-partum |
|--------------------------------------------|----------------------------------------------------------------------|--------------------------------------------------------------|-------------------------------------------------------------------------------------------------------------------------------|------------------------------------------------------|
| Madsen, 2019 <sup>32</sup>                 | NA                                                                   | NA                                                           | NA                                                                                                                            | NA                                                   |
| Martin-de-las-Heras,<br>2018 <sup>33</sup> | NA                                                                   | E: 2 (1.2-3.3) <sup>B</sup><br>P: 0.9 (0.3-2.6) <sup>B</sup> | NA                                                                                                                            | NA                                                   |
| Miller-Graff, 2018 <sup>15</sup>           | P + E + S: 0.62 (0.06-6.7)                                           |                                                              |                                                                                                                               |                                                      |
| Tiwari, 2018 <sup>19</sup>                 | NA                                                                   |                                                              |                                                                                                                               |                                                      |
| Wallenborn, 2018 <sup>20</sup>             | P: 1.05 (0.9-1.23)                                                   | P: 0.9 (0.73-1.11)                                           | NA                                                                                                                            | NA                                                   |
|                                            | P: 0.98 (0.84-1.13)                                                  |                                                              | NA                                                                                                                            | NA                                                   |
| Boyce, 2017 <sup>21</sup>                  | P: 0.81 (0.71-0.93) <sup>C</sup><br>S: 0.52 (0.36-0.76) <sup>C</sup> |                                                              | P + S: 0.83 (0.67-1.01) <sup>C</sup>                                                                                          |                                                      |
| Finnbogadottir, 2017 <sup>22</sup>         | NA                                                                   | NA                                                           | NA                                                                                                                            | NA                                                   |
| Holland, 2017 <sup>23</sup>                |                                                                      |                                                              | P + E + S: 2.3 (0.7-7.2) <sup>D,E</sup><br>P + E + S: 1.8 (0.9-3.9) <sup>D,F</sup><br>P + E + S: 0.9 (0.2-3.8) <sup>D,G</sup> |                                                      |
| Hasselmann, 2016 <sup>17</sup>             | NA                                                                   |                                                              |                                                                                                                               |                                                      |
| Islam, 2016 <sup>24</sup>                  | NA                                                                   | NA                                                           | NA                                                                                                                            | NA                                                   |
| Sørbo, 2015 <sup>18</sup>                  | NA                                                                   |                                                              | NA                                                                                                                            |                                                      |
| James, 2014 <sup>25</sup>                  | NA                                                                   |                                                              |                                                                                                                               |                                                      |
| Moraes, 2011 <sup>26</sup>                 | NA                                                                   | NA                                                           | NA                                                                                                                            | NA                                                   |
| Shroff, 2011 <sup>27</sup>                 | NA                                                                   | NA                                                           | NA                                                                                                                            | NA                                                   |
| Lau, 2007 <sup>28</sup>                    | NA                                                                   | NA                                                           | NA                                                                                                                            | NA                                                   |
| Silverman, 2006 <sup>29</sup>              | NA                                                                   | NA                                                           | P + E: 0.95 (0.81-1.1)                                                                                                        | P + E: 0.86 (0.69-1.06)                              |
|                                            | NA                                                                   | NA                                                           | P + E: 0.87 (0.76-1.01)                                                                                                       |                                                      |

NA (not applicable)

\* IPV measured as physical (P), or emotional (E) or sexual (S)

\*\* IPV measured as physical (P), emotional/psychological/mental (M) and sexual (S) combined

<sup>B</sup> Measured as BF avoidance

<sup>C</sup> Lifetime IPV interpreted as lower odds of early initiation of BF

<sup>D</sup> Measured as OR

<sup>E</sup> White women

<sup>F</sup> Black women

<sup>G</sup> Hispanic women

**Table S2.5: Early termination of exclusive breastfeeding (aOR; 95% CI) vs. no termination of exclusive breastfeeding**

| Reference                               | Exposed to IPV* prior to pregnancy                                   | Exposed to IPV* during pregnancy/post-partum                                            | Exposed to any IPV** prior to pregnancy                                                                                                                                                                                                                                                                               | Exposed to any IPV** during pregnancy/post-partum                                    |
|-----------------------------------------|----------------------------------------------------------------------|-----------------------------------------------------------------------------------------|-----------------------------------------------------------------------------------------------------------------------------------------------------------------------------------------------------------------------------------------------------------------------------------------------------------------------|--------------------------------------------------------------------------------------|
| Madsen, 2019 <sup>32</sup>              | P: 1.53 (1.01-23.1)<br>E: 1.61 (1.26-2.07)<br>S: 1.5 (1.07-2.09)     | P: 1.68 (1-2.82)<br>E: 1.23 (0.91-1.65)<br>S: 1.35 (0.96-1.91)                          | P + E + S: 1.93 (1.11-3.34)                                                                                                                                                                                                                                                                                           | P + E + S: 2.87 (1.27-6.46)                                                          |
| Martin-de-las-Heras, 2018 <sup>33</sup> | NA                                                                   | NA                                                                                      | NA                                                                                                                                                                                                                                                                                                                    | NA                                                                                   |
| Miller-Graff, 2018 <sup>15</sup>        | NA                                                                   | NA                                                                                      | 0.41 <sup>A</sup> (0.11-1.45)                                                                                                                                                                                                                                                                                         | NA                                                                                   |
| Tiwari, 2018 <sup>19</sup>              | NA                                                                   | NA                                                                                      | NA                                                                                                                                                                                                                                                                                                                    | NA                                                                                   |
| Wallenborn, 2018 <sup>20</sup>          | NA                                                                   | NA                                                                                      | NA                                                                                                                                                                                                                                                                                                                    | NA                                                                                   |
| Boyce, 2017 <sup>21</sup>               | P: 0.83 (0.71-0.96) <sup>B</sup><br>S: 0.74 (0.49-1.12) <sup>B</sup> |                                                                                         | P + S: 0.92 (0.75-1.15) <sup>B</sup>                                                                                                                                                                                                                                                                                  |                                                                                      |
| Finnbogadottir, 2017 <sup>22</sup>      |                                                                      |                                                                                         | P + E + S: 5.7515 (0.229-144.4791) <sup>N,T</sup><br>P + E + S: 1.7305 (0.4944-6.0564) <sup>O,T</sup><br>P + E + S: 0.7756 (0.2616-2.9999) <sup>P,T</sup><br>P + E + S: 0.5204 (0.2158-1.2548) <sup>Q,T</sup><br>P + E + S: 0.5442 (0.2224-1.3319) <sup>R,T</sup><br>P + E + S: 0.5792 (0.1655-2.0271) <sup>S,T</sup> |                                                                                      |
| Holland, 2017 <sup>23</sup>             |                                                                      |                                                                                         | P + E + S: 1.73 (0.97-3.11) <sup>I,K</sup><br>P + E + S: 1.65 (0.95-2.86) <sup>J,K</sup><br>P + E + S: 0.95 (0.63-1.43) <sup>L,L</sup><br>P + E + S: 0.97 (0.67-1.39) <sup>J,L</sup><br>P + E + S: 0.71 (0.41-1.19) <sup>J,M</sup><br>P + E + S: 0.83 (0.50-1.35) <sup>J,M</sup>                                      |                                                                                      |
| Hasselmann, 2016 <sup>17</sup>          | NA                                                                   | NA                                                                                      | NA                                                                                                                                                                                                                                                                                                                    | P + E + S: 1.35 (1.07-1.71) <sup>G</sup><br>P + E + S: 1.56 (1.16-1.95) <sup>H</sup> |
| Islam, 2016 <sup>24</sup>               | NA                                                                   | P: 0.17 (0.07-0.4) <sup>C</sup><br>E: 0.51 (0.26-1) <sup>D</sup><br>S: 0.43 (0.18-1.06) | NA                                                                                                                                                                                                                                                                                                                    | NA                                                                                   |
| Sorbo, 2015 <sup>18</sup>               | NA                                                                   | NA                                                                                      | NA                                                                                                                                                                                                                                                                                                                    | NA                                                                                   |
| James, 2014 <sup>25</sup>               | NA                                                                   | NA                                                                                      | NA                                                                                                                                                                                                                                                                                                                    | NA                                                                                   |
| Moraes, 2011 <sup>26</sup>              | NA                                                                   | P: 1.17 (0.89-1.53) <sup>E</sup>                                                        | NA                                                                                                                                                                                                                                                                                                                    | NA                                                                                   |
| Shroff, 2011 <sup>27</sup>              | P: 0.69 (0.42-1.11)                                                  |                                                                                         | NA                                                                                                                                                                                                                                                                                                                    | NA                                                                                   |

|                               |    |    |    |                                            |
|-------------------------------|----|----|----|--------------------------------------------|
| Lau, 2007 <sup>28</sup>       | NA | NA | NA | P + E + S: 1.839 (1.61-2.911) <sup>F</sup> |
| Silverman, 2006 <sup>29</sup> | NA | NA | NA | NA                                         |

NA (not applicable)

\* IPV measured as physical (P), or emotional (E) or sexual (S)

\*\* IPV measured as physical (P), emotional/psychological/mental (M) and sexual (S) combined

<sup>A</sup> Measured as crude OR and interpreted as lower likelihood of EBF

<sup>B</sup> Lifetime IPV and interpreted as lower odds of EBF

<sup>C</sup> Interpreted as 83 % greater risk of discontinuing EBF

<sup>D</sup> Interpreted as 49 % less likely to exclusively breastfeed

<sup>E</sup> Measured as HR and interpreted as probability of early cessation of EBF

<sup>F</sup> Measured as experience of 'no IPV' and interpreted as more likely to breastfeed

<sup>G</sup> IPV until 3<sup>rd</sup> month postpartum measured as RR

<sup>H</sup> IPV in the 3<sup>rd</sup> month postpartum measured as RR

<sup>I</sup> EBF at 4 weeks postpartum

<sup>J</sup> EBF at 14 weeks postpartum

<sup>K</sup> White women

<sup>L</sup> Black women

<sup>M</sup> Hispanic women

<sup>N</sup> EBF at 1 month

<sup>O</sup> EBF at 2 months

<sup>P</sup> EBF at 4 months

<sup>Q</sup> EBF at 6 months

<sup>R</sup> EBF at 9 months

<sup>S</sup> EBF at 12 months

<sup>T</sup> OR measured at: [https://www.medcalc.org/calc/odds\\_ratio.php](https://www.medcalc.org/calc/odds_ratio.php)

Figure 1: Flow chart of study selection in the review of intimate partner violence and breastfeeding outcomes

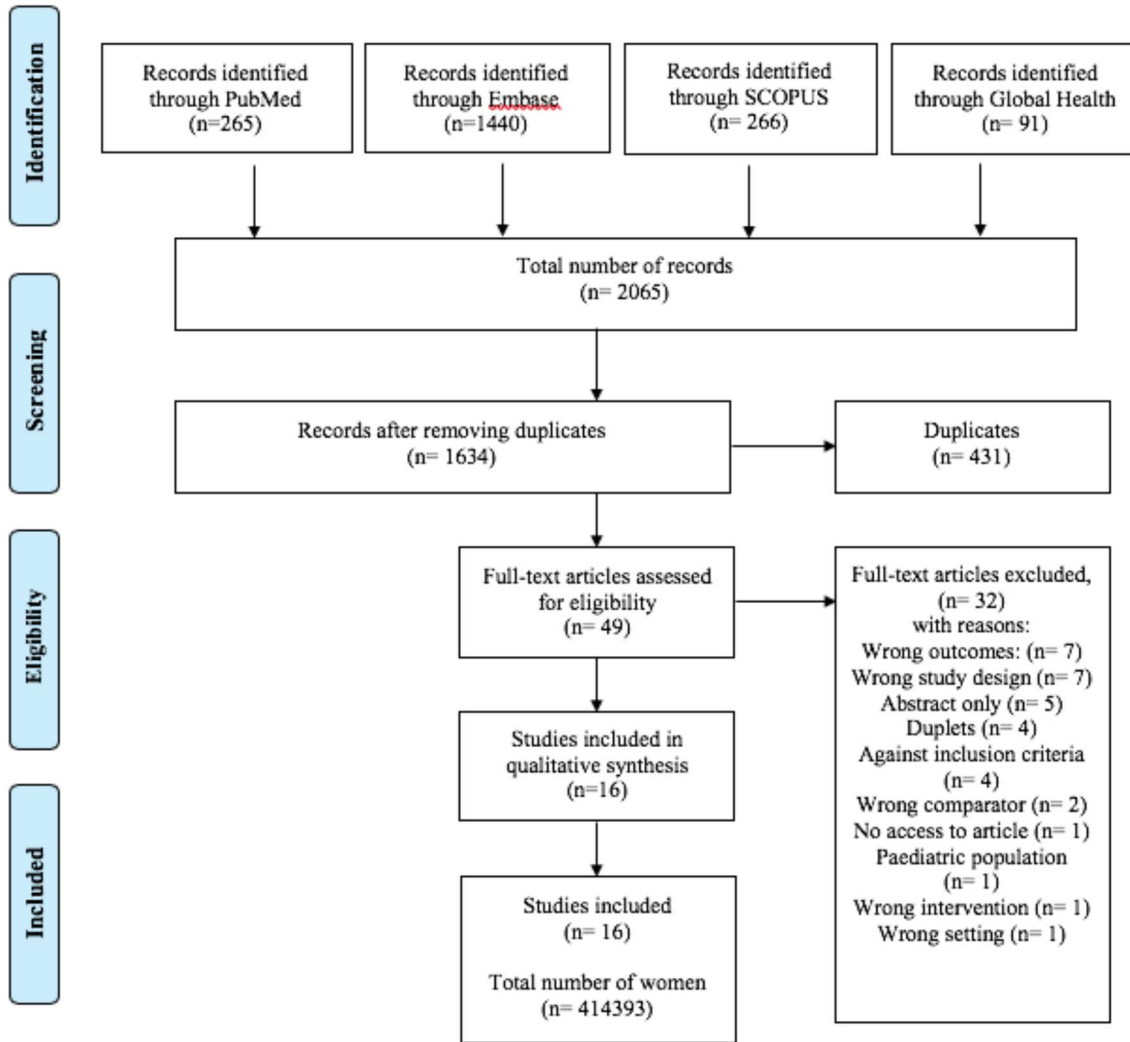



**Figure 2: Study quality for cohort and cross-sectional studies in the review of intimate partner violence and breastfeeding outcomes**

### Cohort studies

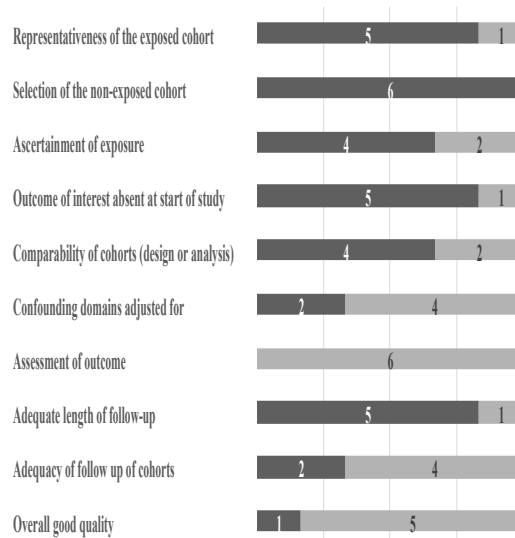

### Cross-sectional studies

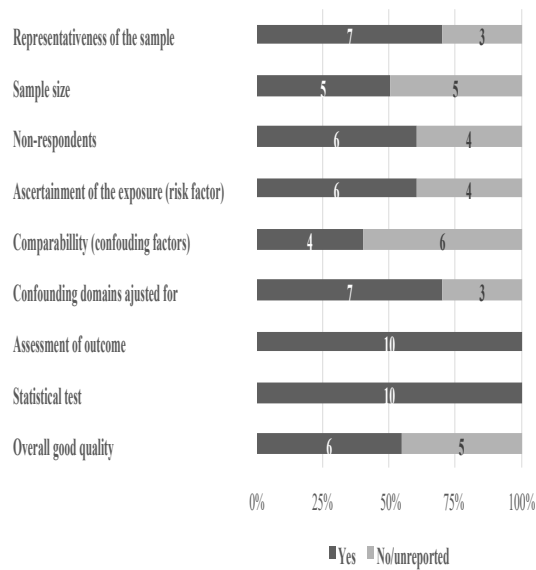

In the figure illustration of the NOS scale, the studies, which reached a maximum of stars in each category of the NOS-scale was rewarded a ‘yes’ and further if the studies adjusted for more than four confounding domains, they were rewarded a ‘yes’ (see appendix S2.2)

**Figure 3: Results of physical violence and association with breastfeeding duration, breastfeeding initiation and exclusive breastfeeding presented in a Forest plot**

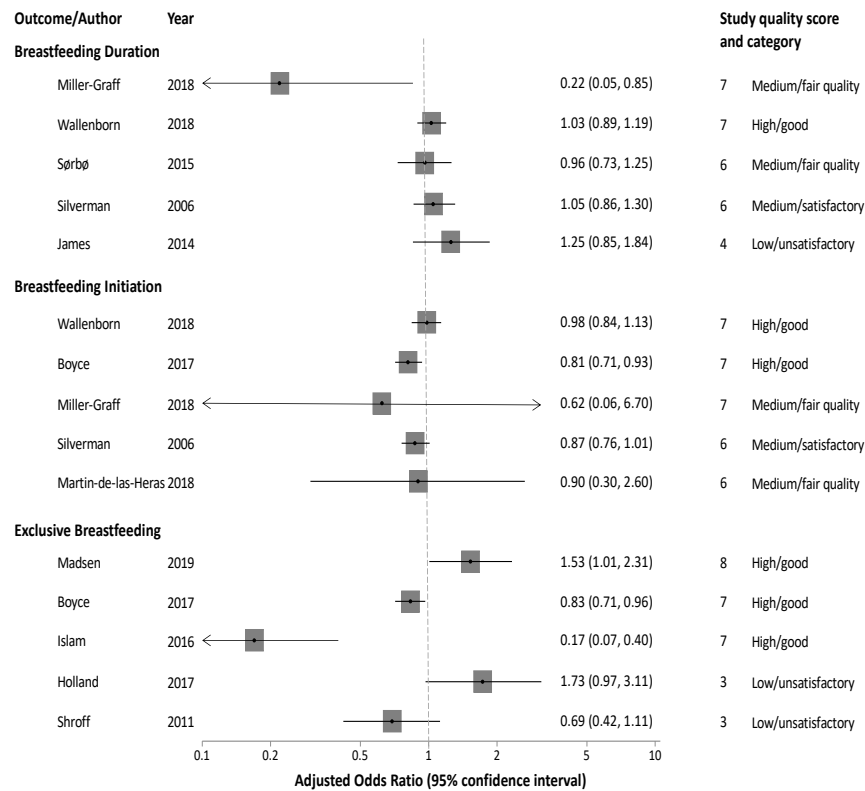

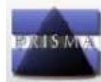

# PRISMA 2009 Checklist

1  
2  
3  
4  
5  
6  
7  
8  
9  
10  
11  
12  
13  
14  
15  
16  
17  
18  
19  
20  
21  
22  
23  
24  
25  
26  
27  
28  
29  
30  
31  
32  
33  
34  
35  
36  
37  
38  
39  
40  
41  
42  
43  
44  
45  
46  
47

| Section/topic                      | #  | Checklist item                                                                                                                                                                                                                                                                                              | Reported on page # |
|------------------------------------|----|-------------------------------------------------------------------------------------------------------------------------------------------------------------------------------------------------------------------------------------------------------------------------------------------------------------|--------------------|
| <b>TITLE</b>                       |    |                                                                                                                                                                                                                                                                                                             |                    |
| Title                              | 1  | Identify the report as a systematic review, meta-analysis, or both.                                                                                                                                                                                                                                         | 1                  |
| <b>ABSTRACT</b>                    |    |                                                                                                                                                                                                                                                                                                             |                    |
| Structured summary                 | 2  | Provide a structured summary including, as applicable: background; objectives; data sources; study eligibility criteria, participants, and interventions; study appraisal and synthesis methods; results; limitations; conclusions and implications of key findings; systematic review registration number. | 2                  |
| <b>INTRODUCTION</b>                |    |                                                                                                                                                                                                                                                                                                             |                    |
| Rationale                          | 3  | Describe the rationale for the review in the context of what is already known.                                                                                                                                                                                                                              | 2-3                |
| Objectives                         | 4  | Provide an explicit statement of questions being addressed with reference to participants, interventions, comparisons, outcomes, and study design (PICOS).                                                                                                                                                  | 2-3                |
| <b>METHODS</b>                     |    |                                                                                                                                                                                                                                                                                                             |                    |
| Protocol and registration          | 5  | Indicate if a review protocol exists, if and where it can be accessed (e.g., Web address), and, if available, provide registration information including registration number.                                                                                                                               | 3                  |
| Eligibility criteria               | 6  | Specify study characteristics (e.g., PICOS, length of follow-up) and report characteristics (e.g., years considered, language, publication status) used as criteria for eligibility, giving rationale.                                                                                                      | 3                  |
| Information sources                | 7  | Describe all information sources (e.g., databases with dates of coverage, contact with study authors to identify additional studies) in the search and date last searched.                                                                                                                                  | 3                  |
| Search                             | 8  | Present full electronic search strategy for at least one database, including any limits used, such that it could be repeated.                                                                                                                                                                               | 3 + appendix       |
| Study selection                    | 9  | State the process for selecting studies (i.e., screening, eligibility, included in systematic review, and, if applicable, included in the meta-analysis).                                                                                                                                                   | 3-4                |
| Data collection process            | 10 | Describe method of data extraction from reports (e.g., piloted forms, independently, in duplicate) and any processes for obtaining and confirming data from investigators.                                                                                                                                  |                    |
| Data items                         | 11 | List and define all variables for which data were sought (e.g., PICOS, funding sources) and any assumptions and simplifications made.                                                                                                                                                                       |                    |
| Risk of bias in individual studies | 12 | Describe methods used for assessing risk of bias of individual studies (including specification of whether this was done at the study or outcome level), and how this information is to be used in any data synthesis.                                                                                      | 4                  |
| Summary measures                   | 13 | State the principal summary measures (e.g., risk ratio, difference in means).                                                                                                                                                                                                                               |                    |
| Synthesis of results               | 14 | Describe the methods of handling data and combining results of studies, if done, including measures of consistency (e.g., I <sup>2</sup> ) for each meta-analysis.                                                                                                                                          |                    |

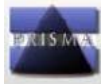

# PRISMA 2009 Checklist

Page 1 of 2

| Section/topic                 | #  | Checklist item                                                                                                                                                                                           | Reported on page # |
|-------------------------------|----|----------------------------------------------------------------------------------------------------------------------------------------------------------------------------------------------------------|--------------------|
| Risk of bias across studies   | 15 | Specify any assessment of risk of bias that may affect the cumulative evidence (e.g., publication bias, selective reporting within studies).                                                             | 4                  |
| Additional analyses           | 16 | Describe methods of additional analyses (e.g., sensitivity or subgroup analyses, meta-regression), if done, indicating which were pre-specified.                                                         |                    |
| <b>RESULTS</b>                |    |                                                                                                                                                                                                          |                    |
| Study selection               | 17 | Give numbers of studies screened, assessed for eligibility, and included in the review, with reasons for exclusions at each stage, ideally with a flow diagram.                                          | 5                  |
| Study characteristics         | 18 | For each study, present characteristics for which data were extracted (e.g., study size, PICOS, follow-up period) and provide the citations.                                                             | 5                  |
| Risk of bias within studies   | 19 | Present data on risk of bias of each study and, if available, any outcome level assessment (see item 12).                                                                                                | 5                  |
| Results of individual studies | 20 | For all outcomes considered (benefits or harms), present, for each study: (a) simple summary data for each intervention group (b) effect estimates and confidence intervals, ideally with a forest plot. | 6                  |
| Synthesis of results          | 21 | Present results of each meta-analysis done, including confidence intervals and measures of consistency.                                                                                                  |                    |
| Risk of bias across studies   | 22 | Present results of any assessment of risk of bias across studies (see Item 15).                                                                                                                          |                    |
| Additional analysis           | 23 | Give results of additional analyses, if done (e.g., sensitivity or subgroup analyses, meta-regression [see Item 16]).                                                                                    |                    |
| <b>DISCUSSION</b>             |    |                                                                                                                                                                                                          |                    |
| Summary of evidence           | 24 | Summarize the main findings including the strength of evidence for each main outcome; consider their relevance to key groups (e.g., healthcare providers, users, and policy makers).                     | 6                  |
| Limitations                   | 25 | Discuss limitations at study and outcome level (e.g., risk of bias), and at review-level (e.g., incomplete retrieval of identified research, reporting bias).                                            | 6-7                |
| Conclusions                   | 26 | Provide a general interpretation of the results in the context of other evidence, and implications for future research.                                                                                  | 8                  |
| <b>FUNDING</b>                |    |                                                                                                                                                                                                          |                    |
| Funding                       | 27 | Describe sources of funding for the systematic review and other support (e.g., supply of data); role of funders for the systematic review.                                                               | 8                  |

From: Moher D, Liberati A, Tetzlaff J, Altman DG, The PRISMA Group (2009). Preferred Reporting Items for Systematic Reviews and Meta-Analyses: The PRISMA Statement. PLoS Med 6(7): e1000097. doi:10.1371/journal.pmed1000097

For more information, visit: [www.prisma-statement.org](http://www.prisma-statement.org).

Page 2 of 2

For peer review only - <http://bmjopen.bmj.com/site/about/guidelines.xhtml>

# BMJ Open

## Intimate Partner Violence and Breastfeeding: A Systematic Review

|                                 |                                                                                                                                                                                                                                                                                                                                                                                                                                                                                                                                                                                                                                                                                                                                                                                                                |
|---------------------------------|----------------------------------------------------------------------------------------------------------------------------------------------------------------------------------------------------------------------------------------------------------------------------------------------------------------------------------------------------------------------------------------------------------------------------------------------------------------------------------------------------------------------------------------------------------------------------------------------------------------------------------------------------------------------------------------------------------------------------------------------------------------------------------------------------------------|
| Journal:                        | <i>BMJ Open</i>                                                                                                                                                                                                                                                                                                                                                                                                                                                                                                                                                                                                                                                                                                                                                                                                |
| Manuscript ID                   | bmjopen-2019-034153.R1                                                                                                                                                                                                                                                                                                                                                                                                                                                                                                                                                                                                                                                                                                                                                                                         |
| Article Type:                   | Original research                                                                                                                                                                                                                                                                                                                                                                                                                                                                                                                                                                                                                                                                                                                                                                                              |
| Date Submitted by the Author:   | 22-Apr-2020                                                                                                                                                                                                                                                                                                                                                                                                                                                                                                                                                                                                                                                                                                                                                                                                    |
| Complete List of Authors:       | Normann, Anne Katrine; Department of Clinical Research, University of Southern Denmark, Odense, Denmark<br>Bakiewicz, Aleksandra; Department of Clinical Research, University of Southern Denmark, Odense, Denmark ; Department of Obstetrics and Gynecology, Odense University Hospital, Odense, Denmark<br>Kjerulff Madsen , Frederikke ; Department of Clinical Research, University of Southern Denmark, Odense, Denmark<br>Khan , Khalid; Department of Preventive Medicine and Public Health, Faculty of Medicine, University of Granada<br>Rasch, Vibeke; Odense Universitetshospital, Obstetrics and Gynaecology; Syddansk Universitet, Institute of Clinical Research<br>Linde, Ditte ; Odense Universitetshospital, Obstetrics and Gynaecology; Syddansk Universitet, Institute of Clinical Research |
| <b>Primary Subject Heading</b>: | Obstetrics and gynaecology                                                                                                                                                                                                                                                                                                                                                                                                                                                                                                                                                                                                                                                                                                                                                                                     |
| Secondary Subject Heading:      | Public health                                                                                                                                                                                                                                                                                                                                                                                                                                                                                                                                                                                                                                                                                                                                                                                                  |
| Keywords:                       | OBSTETRICS, PUBLIC HEALTH, Maternal medicine < OBSTETRICS, Reproductive medicine < GYNAECOLOGY                                                                                                                                                                                                                                                                                                                                                                                                                                                                                                                                                                                                                                                                                                                 |
|                                 |                                                                                                                                                                                                                                                                                                                                                                                                                                                                                                                                                                                                                                                                                                                                                                                                                |

SCHOLARONE™  
Manuscripts

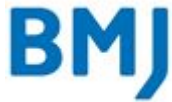

I, the Submitting Author has the right to grant and does grant on behalf of all authors of the Work (as defined in the below author licence), an exclusive licence and/or a non-exclusive licence for contributions from authors who are: i) UK Crown employees; ii) where BMJ has agreed a CC-BY licence shall apply, and/or iii) in accordance with the terms applicable for US Federal Government officers or employees acting as part of their official duties; on a worldwide, perpetual, irrevocable, royalty-free basis to BMJ Publishing Group Ltd ("BMJ") its licensees and where the relevant Journal is co-owned by BMJ to the co-owners of the Journal, to publish the Work in this journal and any other BMJ products and to exploit all rights, as set out in our [licence](#).

The Submitting Author accepts and understands that any supply made under these terms is made by BMJ to the Submitting Author unless you are acting as an employee on behalf of your employer or a postgraduate student of an affiliated institution which is paying any applicable article publishing charge ("APC") for Open Access articles. Where the Submitting Author wishes to make the Work available on an Open Access basis (and intends to pay the relevant APC), the terms of reuse of such Open Access shall be governed by a Creative Commons licence – details of these licences and which [Creative Commons](#) licence will apply to this Work are set out in our licence referred to above.

Other than as permitted in any relevant BMJ Author's Self Archiving Policies, I confirm this Work has not been accepted for publication elsewhere, is not being considered for publication elsewhere and does not duplicate material already published. I confirm all authors consent to publication of this Work and authorise the granting of this licence.

## Intimate Partner Violence and Breastfeeding: A Systematic Review

A K Normann<sup>a</sup>, A Bakiewicz<sup>a,b</sup>, F K Madsen<sup>a</sup>, K S Khan<sup>c</sup>, V Rasch<sup>a,b</sup>, D S Linde<sup>a,b,d</sup>

<sup>a</sup>Department of Clinical Research, University of Southern Denmark, Odense, Denmark

<sup>b</sup>Department of Obstetrics and Gynecology, Odense University Hospital, Odense, Denmark

<sup>c</sup>Department of Preventive Medicine and Public Health, Faculty of Medicine, University of Granada

<sup>d</sup>OPEN, Odense Patient Data Explorative Network, Odense University Hospital, Odense, Denmark

*Corresponding author:* Anne Katrine Normann Nielsen, Department of Clinical Research, University of Southern Denmark, 5000 Odense C, Denmark, Ph.: +45 28 74 68 20; e-mail: [annekatrinenn@gmail.com](mailto:annekatrinenn@gmail.com)

**Abstract**

**Objective:** The association between intimate partner violence (IPV) and breastfeeding is unclear. We conducted a systematic review to summarise the evidence of breastfeeding outcomes following exposure to IPV.

**Design:** Systematic review.

**Methods:** We searched for published studies without study design or language restrictions (up to July 2019) in the following databases: PubMed, Embase, SCOPUS and The Global Health Library. Studies assessing various breastfeeding outcomes (initiation, duration and exclusive breastfeeding) in women exposed to IPV in any form (physical, psychological or sexual) and at any stage (one-year pre-, during, or post pregnancy) were included. Two authors independently selected the studies and conducted the quality appraisal by use of the Newcastle-Ottawa Scale. Results were summarised taking precision and quality into account.

**Results:** A total of 16 studies (participants n= 414,393) were included and they adjusted for a total of 48 different confounders. The majority of studies were cross-sectional (n= 11) and most studies were judged to be fair/low quality. Four out of seven studies found that IPV exposure shortened breastfeeding duration (aORs= 0,22 (95 % CI: 0,05-0,85), 1,18 (95 % CI: 1,01-1,37), 5,92 (95 % CI: 1,72-27,98), 1,28 (95 % CI: 1,18-1,39)) Further, 5/10 studies found that IPV led to early termination of exclusive breastfeeding (aORs= 1,53 (95 % CI: 1,01-23,1), 0,83 (95 % CI: 0,71-0,96), 1,35 (95 % CI:1,07-1,71), 0,17 (95 % CI: 0,07-0,4), 1,839 (95 % CI: 1,61-2,911)) and 2/6 studies found that IPV significantly reduced breastfeeding initiation (aOR= 2,00 (95% CI: 1,2-3,3), 0,81 (95% CI: 0,7-0,93)).

**Conclusion:** IPV exposure appears to associate negatively with some breastfeeding outcomes. Individual patient data meta-analysis is required to quantify the magnitude of the association for specific IPV-outcome combinations. More high-quality studies and definition of core confounders is warranted.

**PROSPERO registration number:** CRD42019129353 (prospectively registered)

**Keywords:** Intimate partner violence, domestic violence, breastfeeding, breastfeeding practices, exclusive breastfeeding, breastfeeding initiation.

**Strengths and limitations of this study:**

- This systematic review provides the latest evidence of the association between IPV and breastfeeding and summarises studies that have not previously been included in other reviews.
- We conducted a proper quality assessment of included studies by use of the Newcastle-Ottawa Scale
- We provided an overview of the heterogenous field of confounders and suggest defining core confounders related to IPV.
- The majority of studies included in this review were cross-sectional, hence, it was not possible to make a causal association nor conduct a meta-analysis.



## Introduction

Intimate partner violence (IPV) is defined as any behavior by a current or former intimate partner that causes physical, psychological or sexual harm to those within an intimate relationship (1, 2). Most often, IPV is perpetrated by men against women (1-3), and the World Health Organization (WHO) estimates that one in three women will be exposed to either physical/or sexual violence during their lifetime (2). IPV can have both immediate and long-term mental and physical health consequences for the victims, including depression and physical impairment (3-5). Further, it has been found that IPV is related to a number of reproductive health outcomes, including preterm birth, low birth weight, insufficient weight gain, miscarriage, induced abortion and difficulties or lack of attachment to the baby (3-6). It has been speculated that IPV may also influence the establishment of breastfeeding practices, however this association is complex. WHO recommends initiating breastfeeding within one hour of birth, exclusive breastfeeding for six months and that mothers should continue breastfeeding for up to two years or beyond together with complementary feeding (7). IPV may affect breastfeeding directly, e.g. through sore nipples and difficulty in relaxing enough for adequate let down, but also indirectly, e.g. through lack of support or depression, self-doubt, body negativity, and anxiety (8, 9). Furthermore, qualitative studies have found that women who have experienced violence in their childhood may have trouble continuing exclusive breast feeding due to difficulties in separating the sexual role from the maternal role of breasts or due to lack of situational control (10, 11). The existing literature is characterised by various outcome measures for both IPV and breastfeeding, and further there are no agreement of core factors that may confound the association between IPV and breastfeeding, hence, there is variation in the statistical models used for analysing the relationship. This may be the reasons why studies on the relationship of IPV and breastfeeding practise have had inconsistent results. A study of IPV and breastfeeding practices across Africa found that IPV was associated with lower adjusted odds for breastfeeding initiation and exclusive breastfeeding in some African countries and higher adjusted odds in other countries (12), whilst a recent systematic review concluded that the majority of studies (n= 12, participant= 133,861) found a negative association between breastfeeding initiation and exclusive breastfeeding for the first six months (13). Yet, the review did not involve proper quality assessment and had no detailed discussion of confounders. Further, new literature has been published. Therefore, we conducted a robust systematic review thoroughly investigating the association of exposure to IPV pre, during and post pregnancy with breastfeeding outcomes sand synthesised the evidence taking confounders, precision and quality into considerations.

## Methods

This systematic review was conducted according to the Preferred Reporting Items for Systematic Reviews and Meta-Analyses (PRISMA) (14) and Meta-analyses Of Observational Studies in Epidemiology (MOOSE) (15) guidelines. The protocol was prospectively registered in The International Prospective Register of Systematic Reviews (PROSPERO, ID: CRD42019129353)

### *Eligibility criteria and search methods identification of studies*

We searched PubMed, Embase, SCOPUS and the Global Health Library from the (8-12 March 2019) with no time or language restrictions. An updated search was conducted the 18<sup>th</sup> of July 2019. Search terms included “intimate partner violence” OR “spouse abuse” OR “domestic violence” OR “physical abuse” OR “sex offenses” OR “battered women” AND “breast feeding” OR “breastmilk expression” OR “feeding behavior” OR “milk, human” OR lactation OR “milk

1  
2  
3  
4 130 ejection” (full search in Appendix, S1). Eligible studies were original publications that reported exposure to IPV and  
5  
6 131 breastfeeding practices in according with WHO’s recommendations and exposure to IPV. We included studies with  
7 132 women exposed to violence one year prior to pregnancy, during pregnancy, and in the postpartum period and excluded  
8  
9 133 studies of women who had experienced childhood abuse. Further, we excluded studies of violence perpetrated by  
10 134 women against men.

11 135  
12  
13 136 After removing duplicates, two authors independently screened titles, abstract and full-text (AKN and AB) using  
14 137 Covidence ([www.covidence.org](http://www.covidence.org)) (16). Disagreements were solved through discussion. One author (AKN) extracted  
15  
16 138 data from included studies into a standardised Excel template. Extracted data included: Title, first author, publication  
17 139 year, country, study characteristics, study objective, participant characteristics, sample size, inclusion/exclusion  
18  
19 140 criteria, type of exposure, measurement tool of exposure, primary outcomes and confounders that were adjusted for  
20 141 in the statistical analysis. Outcome data were verified by a second author (FKM).

#### 21 142 22 23 143 *Study quality assessment and data synthesis*

24 144 The Newcastle Ottawa Scale (NOS) was used to assess the quality of cohort studies and a modified version of the  
25  
26 145 scale was used for cross-sectional studies. The scale addresses the following domains: Selection process,  
27 146 comparability, exposure and outcome of interest. A maximum of nine stars can be given if all domains are well  
28  
29 147 described in a given study. Cohort studies are regarded to be of ‘good quality’ if rewarded 3 or 4 stars in the selection  
30 148 domain, 1 or 2 stars in the comparability domain, and 2 or 3 stars in the outcome/exposure domain. Studies are  
31  
32 149 regarded as being of ‘fair quality’ if rewarded 2 stars in the selection domain, 1 or 2 stars in the comparability domain,  
33 150 and 2 or 3 stars in the outcome/exposure domain. Finally, studies are judged as being of ‘poor quality’ if rewarded 0  
34  
35 151 or 1 star in the selection domain or 0 stars in the comparability domain or 0 or 1 stars in the outcome/exposure domain.  
36 152 For the cross-sectional version of the scale, the domain that assessed confounders was modified and no stars were  
37 153 given if studies did not justify their choice of confounders in their statistical analysis. A total of 10 stars can be given  
38  
39 154 to the cross-sectional studies, and they are regarded as ‘very good’ if rewarded 9-10 points, ‘good’ if rewarded 7-8  
40 155 points, ‘satisfactory’ if rewarded 5-6 points and ‘unsatisfactory’ if rewarded 0-4 points. Further, we modified both  
41  
42 156 scales and added a point system for confounders, so that each study was given one point or star for each confounder  
43 157 they adjusted for (Table S2.1) Two authors (AKN and FMK) conducted the quality assessment independently and  
44  
45 158 compared results. Disagreement were solved through discussion. AKN and DSL conducted the quality assessment of  
46 159 Madsen et al., as FKM was co-author of this study and therefore considered ineligible.

47 160  
48  
49 161 Two authors (AKN and DSL) made key domains for confounding factors and grouped them (Table S2.2). Results for  
50 162 the various IPV outcomes combinations were summarised and physical violence was presented in a forest plot.  
51  
52 163 Inferences were generated taking study precision and quality into account as meta-analysis was not possible. The  
53 164 substantial heterogeneity of exposure, outcome, study quality and statistical models in the adjusted odds ratios (aOR)  
54  
55 165 reported in individual studies was the reason we settled for a qualitative synthesis in the form of vote-counting, which  
56 166 we conducted within broad exposure-outcome subgroups stratified by study quality and precision to minimise bias.  
57 167 To determine whether a study showed a negative association or no difference we relied on numerical data in vote-

1  
2  
3  
4 168 counting to avoid subjectivity. This approach is in line with what is considered suitable given study variability in  
5  
6 169 previous review publications (17, 18).

7 170  
8  
9 171 **Patient and Public Involvement:**

10 172 No patients involved.

11 173  
12  
13 174 **Results**

14 175 The database searches resulted in 2062 records and 1634 records were eligible for title and abstract screening after  
15 removal of duplicates (Fig. 1). A total of 16 studies met the inclusion criteria of which 11 were cross-sectional (19-  
16 176 30) and five were cohort studies (31-34). The studies were published between 2006 and 2019. Four studies was  
17 177 conducted in The United States (19, 21, 24, 30), four in India (20, 22, 25, 28), two in Brazil (27, 33), one in Tanzania  
18 (31), one in Spain (32), one in Sweden (23), , one in Norway (34), one in Australia (26) and one in Hong Kong (29).  
19 178 Population age ranged from 14 years to 49 year and was reported as means (n= 3) or in intervals (n= 13). The size of  
20 179 the study population varied from 69 to 195,264 participants with a mean sample size of 25,899 (Table 1). Exposure  
21 (IPV) was measured through questionnaires (21, 22, 24, 25, 28, 30, 31) or through various validated tools: The  
22 180 Conflict-Tactic Scale (CTS) (19, 20, 27, 29, 33), The Abuse Assessment Screen (AAS) (29), the Index of Spouse  
23 181 Abuse (ISA) (32), the Composite Abuse Scale (CAS) (26), and the Norvold Abuse Questionnaire (23) (Table 1)

24 182  
25  
26 183  
27 184  
28  
29 185  
30 186 In regards to exposure, two of the studies only focused on physical violence (21, 27) and one study only focused on  
31 psychological violence (20). However, the majority of studies measured IPV as ‘any IPV’ and did not separate  
32 187 violence into groups (19, 21, 23, 26, 28-30, 33), and five studies measured both physical, or/and psychological or/and  
33 188 sexual violence respectively and combined to compare the differences in exposure of a certain type of IPV (22, 25,  
34 189 31, 32, 34). The outcome, breastfeeding was measured as early cessation/shortened duration of breastfeeding,  
35 initiation of breastfeeding, or exclusive breastfeeding. The definition of “shortened duration of breastfeeding” differed  
36 190 as each study sat their own time limit (Table S2.3). Some studies investigated more than one outcome and therefore,  
37 191 one study could be presented in more than one outcome table.  
38  
39 192  
40 193  
41  
42 194

43 195 Overall, the included studies adjusted for 48 different confounders within the following domains: maternal  
44 sociodemographic, relationship characteristics, maternal lifestyle and health, economy, pregnancy and postpartum  
45 196 related problems, child characteristics, support during pregnancy and postpartum, violence or stressful life events,  
46 197 pregnancy intention, caste and religion. The most common confounding factors were maternal lifestyle and health,  
47 198 maternal sociodemographics, and relationship characteristics. The majority of studies did not justify their choice of  
48 199 confounders (20-24, 26, 28-30, 33). Sorbo et al. and Madsen et. al. used the directed acyclic graph (DAG) to justify  
50 200 the confounders adjusted for in their analysis, and Sorbo et. al. also made a sensitivity analysis to determine whether  
51 201 or not the association between IPV and breastfeeding practices was mediated primarily through postpartum  
52 202 depression. They found that depression could not explain early cessation of breastfeeding (34).  
53 203  
54  
55 204

56 204  
57 205 *Study quality assessment*  
58  
59  
60

1  
2  
3  
4 206 Of the five cohort studies, one study was judged as 'good quality' (31), three studies was judged as 'fair quality' (19,  
5 207 32, 34) and one study was judged as 'poor quality' (33). Of the 11 cross-sectional studies, six were judged as having  
6 208 'good' quality (20-22, 25, 27, 29), one was judged as 'satisfactory' (30) and three studies were judged as  
7 209 'unsatisfactory' (24, 26, 28). One cross-sectional study was not assessed using NOS for cross-sectional studies, since  
8 210 the study was embedded from a cohort (23), hence, NOS for cohort studies was used to assess the quality and it was  
9 211 judged as of 'poor quality' (23) (Fig. 2).  
10 212

#### 14 213 *Initiation of breastfeeding*

15 214 Six studies investigated the association between exposure to IPV and initiation of breastfeeding (19, 21, 22, 24, 30,  
16 215 32). Two studies found a statistically significant association between initiation of breastfeeding and exposure to either  
17 216 physical or sexual violence (22) (aOR<sub>physical</sub>=0.81; 95% CI 0.71-0.93. aOR<sub>sexual</sub>=0.52; 95% CI 0.36-0.76) or  
18 217 psychological violence (32) (aOR 2.00; 95% CI 1.2-3.3). Four studies found no association when exposed to multiple  
19 218 types of violence (19, 22, 24, 30) (Table S2.4)  
20 219

#### 24 220 *Shortened duration of breastfeeding*

25 221 Seven studies reported outcomes based on early cessation or shortened duration of breastfeeding when exposed to  
26 222 violence (19-21, 24, 26, 30, 34), and four studies found a significant association (aORs= 0.22 (95 % CI: 0.05-0.85),  
27 223 1.18 (95 % CI: 1.01-1.37), 5.92 (95 % CI: 1.72-27.98), 1.28 (95 % CI: 1.18-1.39)) between exposure to IPV and early  
28 224 cessation/shortened duration of breastfeeding (19, 21, 34) (Table S2.3) Miller-graff et. al (19) found that IPV was  
29 225 associated with decreased odds ratio of for continuation of breastfeeding (OR=0.22; 95 % CI 0.5-0.85), hence, IPV  
30 226 was associated with an increased risk of shortened duration of breastfeeding. Further, one study found a statistically  
31 227 significant association between reduced duration/early cessation and IPV (OR=1.41 95% CI 1.15-1.74). However, the  
32 228 association became insignificant when adjusting for confounders (aOR=0.94; 95% CI 0.76-1.7) (30). Three of the  
33 229 studies found no association between violence and breastfeeding duration or early cessation (20, 24, 26). Three studies  
34 230 did not distinguish between period of exposure (26, 28, 33), whereas the remaining papers categorised time of  
35 231 exposure. One study (26) found no association between IPV and breastfeeding practices and concluded that IPV itself  
36 232 did not influence breastfeeding outcomes as much as maternal age, education and birth method (Fig. 3)  
37 233  
38 234

#### 44 234 *Exclusive breastfeeding*

45 235 Ten studies assessed exposure to violence in relation to risk of early termination of exclusive breastfeeding and five  
46 236 studies found a statistically association (aORs= 1.53 (95 % CI: 1.01-23.1), 0.83 (95 % CI: 0.71-0.96), 1.35 (95 %  
47 237 CI:1.07-1.71), 0.17 (95 % CI: 0.07-0.4), 1.839 (95 % CI: 1.61-2.911) (22, 25, 29, 31, 33) and five studies found no  
48 238 statistically association (19, 23, 24, 27, 28) (Fig. 3) (Table S2.5)  
49 239

## 53 240 **Discussion**

### 54 241 *Main findings*

55 242 This systematic review summarised the most recent evidence, between exposure to IPV and breastfeeding practices.  
56 243 A total of 16 studies were included of which 11 were cross-sectional and five were cohort studies. Forty-eight different  
57 244 confounders were controlled for in the studies. Only one cohort was judged as being of good quality, hence, the overall  
58 245  
59 246  
60

1  
2  
3  
4 245 quality of the studies was fair to low. The majority of studies found that exposure to IPV in any form and at any stage  
5  
6 246 had a significant negative association with breastfeeding duration, early termination of exclusive breastfeeding, but it  
7 247 did not reduce initiation.  
8  
9 248

#### 10 249 *Strengths and limitations:*

11 250 The review synthesises the latest evidence of pregnancy-related IPV and WHO recommended breastfeeding practices  
12 251 and elucidates the complex association between IPV exposure, breastfeeding, and confounding factors. A limitation  
13 252 of this review is that the majority of included studies were cross-sectional, hence, a causal association cannot be  
14 253 estimated (35), and we were not able to conduct a meta-analysis. Therefore, there is a need for well-designed  
15  
16 254 longitudinal studies to better estimate the association. Another limitation of this review is that a similar systematic  
17 255 review was recently conducted (13). However, only seven studies were included in both reviews and the data included  
18  
19 256 in this review tripled the evidence size compared to the previous (280,532 more participants contributed data to our  
20 257 analysis than the 133,861 participants previously) (13). Yet one should bear in mind that the participants in this review  
21  
22 258 primarily come from two large scale studies that both used data from Pregnancy Risk Assessment Monitoring System  
23 259 (PRAMS) (21) (30) whilst only one of these studies (30) was included in the previous review. However, as there is  
24  
25 260 no overlap in data - Silverman et. al. (30) used data from women participating in the PRAMS study between 2000-  
26 261 2003, whereas Wallenborn et. al. (21) used data from women participating from 2004-2014, we considered them as  
27  
28 262 separate studies – we believe it to be a strength of this review that both studies are included. In comparison to the  
29  
30 263 other recent review, another strength of this review is that we conducted a proper quality assessment of all included  
31  
32 264 studies and made use of a validated tool in the form of NOS, whilst Mezzavilla et al. (13) used STROBE to assess  
33 265 quality through bias susceptibility of included studies. However, STROBE is not a proper quality assessment tool as  
34 266 this is a reporting guideline for observational studies (36, 37), hence, the quality assessment conducted in this review  
35  
36 267 is more meticulous. Yet, a limitation of NOS is that the quality assessors need to adapt the scale to specific research  
37 268 designs, which can lead to the possibility of low agreement between quality assessors (38, 39). Nevertheless, as our  
38  
39 269 quality assessment was conducted by two independent reviewers, we judged this issue to be minor. Further, the two  
40 270 versions of the NOS scale do not consider that cohort studies are superior to cross-sectional studies in the evidence  
41  
42 271 hierarchy, hence, this is a separate parameter to take into consideration when judging the overall quality of evidence  
43 272 according to NOS. Additionally, our review excluded studies with women who had a lifetime history of violence and  
44 273 childhood abuse, whereas the previous review included these populations of women. Hence, our exposure differs to  
45  
46 274 some extent and a more heterogenous exposure that consist of both childhood abuse and pregnancy-related IPV adds  
47 275 a further complicating element to the association.  
48  
49 276

#### 50 277 **Interpretation of findings**

51  
52 278 Overall, our study results support the findings of the recent review by Mezzavilla et. al (13) despite our review is  
53 279 mainly being based on different studies and have different exposures. In line with Mezzavilla et. al we found that the  
54 280 most investigated outcome was exclusive breastfeeding, and that studies varied in quality. In contrast to Mezzavilla  
55  
56 281 et. al, they also reported significant results from studies investigating women exposed to lifetime history of IPV. This  
57 282 may indicate that exposure to any time of violence may affect breastfeeding patterns. However, the reason why we  
58  
59 283 choose to exclude life time IPV is that evidence points out that the association of only experiencing violence in  
60



1  
2  
3  
4 284 pregnancy may be overestimated as there is evidence that victimisation as a young child increases the risk of further  
5 285 victimisation later in life (40), hence, it also increases risk of breastfeeding difficulties when becoming a mother (41,  
6 286 42). Mediational models exploring childhood abuse and the negative association with breastfeeding have found it to  
7 287 stem from shame and the reaction to touch, in the postnatal period, which can lead to possible re-traumatization (10).  
8  
9 288 With this in mind, it is interesting that only two studies in our review adjusted for childhood abuse in their statistical  
10 289 calculations with contradictory results (19, 34). Hence, as the majority of studies did not control for this factor, we  
11 290 cannot rule out that the exposure of IPV found in this study may be overestimated. Further, it is plausible that our  
12 291 exposure can be affected by recall bias. Women are primarily interviewed about exposure of IPV in relation to  
13 292 pregnancy in the postpartum period, which can potentially introduce recall bias as some women may not remember  
14 293 the extent of the violence or when they were exposed to violence. Moreover, women exposed to violence often under-  
15 294 report or refuse to participate in IPV studies in order to protect themselves or the perpetrator (43). If our effect  
16 295 estimates are affected by recall bias or underreporting, it is plausible that true association is underestimated. Further,  
17 296 exclusive breastfeeding is often referred to as the most favourable type of feeding of infants. These recommendations  
18 297 may influence the women's reports on exclusive breastfeeding as it can be strongly correlated to the feeling of being  
19 298 a "good" mother. If women systematically erroneously report to exclusively breastfeed their babies to a higher extent  
20 299 than what to be the case, it is a type of reporting bias, which may also underestimate the true association between IPV  
21 300 and breastfeeding.  
22  
23 301

24 302 In relation to confounders it is worth noticing that our synthesis elucidated the comprehensive number of confounders  
25 303 that are adjusted for in the IPV-breastfeeding relationship. A key finding of this review is that most studies did not  
26 304 state their reasons for choice of confounders and there seems to be lack of consensus in the identification of potential  
27 305 confounders. Some covariates may be part of the causal pathway of the association between violence and  
28 306 breastfeeding, hence they are not true confounders. For instance, depression is one variable that can both be identified  
29 307 as a confounder, or an intermediate variable in the causal pathway. Sorbo et. al (34) concluded, that depression could  
30 308 not explain early cessation of breastfeeding, whilst other studies (44, 45), found that depression had a negative impact  
31 309 on breastfeeding duration in women suffering from depression. The mechanism between breastfeeding and depression  
32 310 is poorly understood, but research of failed lactation and perinatal depression theorise that it may be the manifestation  
33 311 of neuroendocrine perturbations in gonadal and lactogenic hormones (46). Overall, the inconsistency of potential  
34 312 confounders propose a need for defining core outcome measures related to IPV and breastfeeding practices (47). We  
35 313 suggest an individual patient data meta-analysis (48), by sharing raw data from existing studies and a powerful  
36 314 reanalysis adjusting for predefined confounders, can make evidence synthesis more robust in this area.  
37  
38 315

## 39 316 **Conclusion**

40 317 This review shows that the association between IPV and breastfeeding is complex and that the effect of exposure to  
41 318 IPV on breastfeeding practices was difficult to properly assess based on data synthesis without the possibility of meta-  
42 319 analysis. The majority of studies in this review indicated that IPV exposure in pregnancy was associated with impaired  
43 320 breastfeeding, yet still some studies also found no association. There is no consensus of which confounders influence  
44 321 the relationship, hence, future research should aim to define core outcome measures and include longitudinal studies  
45 322 of high quality with pre-defined confounders.  
46  
47  
48  
49  
50  
51  
52  
53  
54  
55  
56  
57  
58  
59  
60

### Funding

All authors were financed through their institutions: Department of Clinical Research, University of Southern Denmark (SDU), and Odense University Hospital (OUH). Professor Khalid S. Khan is distinguished investigator at the University of Granada through a Beatriz Galindo (Senior Modality) Program grant of the Spanish Ministry of Science, Innovation and Universities. The funders had no role in developing the article.

### Competing interests

DSL, AKN, AB, and KSK had no conflict of interest. VR and FMK are co-authors of one study included in this review.

### Acknowledgements

Research librarians, Lasse Østengaard and Peter Everfelt, for assistance in literature search. Professor Stella Martinde-Las-Heras for providing an advanced copy of her paper for inclusion in our review.

### Author statement

AKN and AB made the protocol and screened for eligible articles. AKN planned the data extraction, which was cross-checked and verified by FKM. AKN, FKM and DSL did quality assessment. Disagreement was solved through discussion.

AKN designed to tables and wrote the first draft of the manuscript, which was reviewed by DSL, VR, KSK and AB. All authors approved the final manuscript.

### Data sharing statement

No additional data available.

**Table 1: Characteristics of studies included in the review of the intimate partner violence and breastfeeding outcomes**

| Reference                      | Study design    | Country           | Setting                                        | Sample size | Age         | Tool to measure IPV                      | Outcome measures                         | Quality |
|--------------------------------|-----------------|-------------------|------------------------------------------------|-------------|-------------|------------------------------------------|------------------------------------------|---------|
| Madsen, 2019 (33)              | Cohort          | Tanzania          | Hospital                                       | 1128        | 20-30       | Interview (from WHO multi-country study) | Premature termination of exclusive BF    | Good    |
| Martin-de-las-Heras, 2018 (34) | Cohort          | Spain             | Antenatal care clinic                          | 718         | >20-40+     | ISA <sup>A</sup>                         | BF avoidance (initiation)                | Fair    |
| Miller-Graff, 2018 (18)        | Cohort          | The United States | WIC clinic (Women, infant and children clinic) | 69          | 26.5 (mean) | CTS <sup>B</sup>                         | BF exclusivity, initiation and cessation | Fair    |
| Tiwari, 2018 (22)              | Cross-sectional | India             | Household                                      | 26,587      | 15-49       | CTS-2 <sup>B</sup>                       | BF duration                              | Good    |

|                                  |                                        |                   |                                                                              |                           |              |                                                        |                                         |                |
|----------------------------------|----------------------------------------|-------------------|------------------------------------------------------------------------------|---------------------------|--------------|--------------------------------------------------------|-----------------------------------------|----------------|
| <b>Wallenborn, 2018 (23)</b>     | Cross-sectional                        | The United States | PRAMS (Pregnancy Risk Assessment Monitoring System)                          | 195,264                   | <20-35+      | Questionnaire                                          | BF initiation and duration              | Good           |
| <b>Boyce, 2017 (24)</b>          | Cross-sectional                        | India             | Household                                                                    | 10,469                    | 20-29        | Questionnaire                                          | Early BF initiation and exclusivity     | Good           |
| <b>Finnbogadottir, 2017 (25)</b> | Cross-sectional                        | Sweden            | Project: "Pregnant women and new mother's life experience"                   | 713                       | 30 (mean)    | Norvold Abuse Questionnaire                            | Exclusive BF                            | Poor           |
| <b>Holland, 2017 (26)</b>        | Cross-sectional                        | The United States | PRAMS (Pregnancy Risk Assessment Monitoring System)                          | 760                       | 20-29        | Questionnaire (based on CDC's monitoring system)       | BF initiation, duration and exclusivity | Unsatisfactory |
| <b>Hasselmann, 2016 (20)</b>     | Cohort                                 | Brazil            | Primary health clinic                                                        | 564                       | <20-20+      | CTS-1 <sup>B</sup>                                     | Interruption of exclusive BF            | Poor           |
| <b>Islam, 2016 (27)</b>          | Cross-sectional                        | India             | Community based survey                                                       | 426                       | 14-25+       | Questionnaire (based on WHO demographic health survey) | Exclusive BF                            | Good           |
| <b>Sørbo, 2015 (21)</b>          | Cohort                                 | Norway            | MoBa (The Norwegian Mother and Child Cohort Study)                           | 53,934                    | 14-35+       | Norvold Abuse Questionnaire                            | Early cessation of any BF               | Fair           |
| <b>James, 2014 (28)</b>          | Cross-sectional (embedded from an RCT) | Australia         | MOVE (Improving maternal and child health nurse care for vulnerable mothers) | 2621                      | 15-35+       | CAS <sup>C</sup>                                       | BF duration                             | Unsatisfactory |
| <b>Moraes, 2011 (29)</b>         | Cross-sectional                        | Brazil            | Public Health Center                                                         | 811                       | <20-20+      | CTS-2 <sup>B</sup>                                     | Early cessation of exclusive BF         | Good           |
| <b>Shroff, 2011 (30)</b>         | Cross-sectional (embedded from an RCT) | India             | Household                                                                    | 600 (mother-infant pairs) | 22.14 (mean) | Questionnaire                                          | Exclusive BF                            | Unsatisfactory |
| <b>Lau, 2007 (31)</b>            | Cross-sectional                        | Hong Kong         | -                                                                            | 1150                      | <25-20+      | AAS <sup>D</sup> , CTS <sup>B</sup>                    | Breastfeeding and mixed feeding         | Good           |
| <b>Silverman, 2006 (32)</b>      | Cross-sectional                        | The United States | PRAMS (Pregnancy Risk Assessment Monitoring System)                          | 118,579                   | <20-30+      | Questionnaire                                          | BF initiation and early cessation       | Satisfactory   |

A: Index of Spouse Abuse, B: Conflict-Tactic Scale, C: Composite Abuse Scale, D: Abuse Assessment Scree



1  
2  
3  
4 **354** **References**

- 5 **355** 1. Claudia Carcia-Moreno AG, Wendy Knerr. Understanding and addressing violence against women WHO; 2012. Report No.:  
6 **356** WHO/RHR/12.36.  
7
- 8 **357** 2. WHO. Violence against women 2017 [10.04.19]. Available from: [https://www.who.int/en/news-room/fact-sheets/detail/violence-](https://www.who.int/en/news-room/fact-sheets/detail/violence-against-women)  
9 **358** [against-women](https://www.who.int/en/news-room/fact-sheets/detail/violence-against-women)
- 10 3. World Health Organization/London School of Hygiene and Tropical Medicine. Preventing intimate partner and sexual violence  
11 **359** against women: taking action and generating evidence. Geneva. 2010. Report No.: 978 92 4 156400 7.  
12 **360**
- 13 **361** 4. WHO. Intimate partner violence during pregnancy. Dept. of Reproductive Health and Research; 2011. Report No.:  
14 **362** WHO/RHR/11.35.
- 15 5. Jasinski JL. Pregnancy and domestic violence: a review of the literature. *Trauma, violence & abuse*. 2004;5(1):47-64.  
16 **363**
- 17 **364** 6. Sigalla GN, Mushi D, Meyrowitsch DW, Manongi R, Rogathi JJ, Gammeltoft T, et al. Intimate partner violence during  
18 **365** pregnancy and its association with preterm birth and low birth weight in Tanzania: A prospective cohort study. *PLoS one*. 2017;12(2):e0172540.  
19
- 20 **366** 7. WHO. Improving maternal, newborn, infant and young child health and nutrition 2013. Report No.: 978 92 4 150555 0.  
21
- 22 **367** 8. Chowdhury AN, Ramakrishna J, Chakraborty AK, Weiss MG. Cultural context and impact of alcohol use in the Sundarban Delta,  
23 **368** West Bengal, India. *Social Science and Medicine*. 2006;63(3):722-31.
- 24 **369** 9. Hasselmann MH, Werneck GL, Silva CV. Symptoms of postpartum depression and early interruption of exclusive breastfeeding  
25 **370** in the first two months of life. *Cadernos de saude publica*. 2008;24 Suppl 2:S341-52.  
26
- 27 **371** 10. Wood K, Van Esterik P. Infant feeding experiences of women who were sexually abused in childhood. *Can Fam Physician*.  
28 **372** 2010;56(4):e136-41.
- 29 **373** 11. Coles J. Qualitative study of breastfeeding after childhood sexual assault. *Journal of human lactation : official journal of*  
30 **374** *International Lactation Consultant Association*. 2009;25(3):317-24.  
31
- 32 **375** 12. Misch E, Yount K. Intimate Partner Violence and Breastfeeding in Africa. *Maternal & Child Health Journal*. 2014;18(3):688-97.  
33
- 34 **376** 13. Mezzavilla RDS, Ferreira MDF, Curioni CC, Lindsay AC, Hasselmann MH. Intimate partner violence and breastfeeding  
35 **377** practices: a systematic review of observational studies. *J Pediatr*. 2018;94(3):226-37.
- 36 **378** 14. Moher D, Liberati A, Tetzlaff J, Altman DG. Preferred reporting items for systematic reviews and meta-analyses: the PRISMA  
37 **379** statement. *PLoS medicine*. 2009;6(7):e1000097.  
38
- 39 **380** 15. Stroup DF, Berlin JA, Morton SC, Olkin I, Williamson GD, Rennie D, et al. Meta-analysis of observational studies in  
40 **381** epidemiology: a proposal for reporting. Meta-analysis Of Observational Studies in Epidemiology (MOOSE) group. *Jama*. 2000;283(15):2008-12.
- 41 **382** 16. Covidence systematic review software, Veritas Health Innovation, Melbourne, Australia. [25.02.19]. Available from:  
42 **383** [www.covidence.org](http://www.covidence.org).  
43
- 44 **384** 17. Coomarasamy A, Khan KS. What is the evidence that postgraduate teaching in evidence based medicine changes anything? A  
45 **385** systematic review. *BMJ (Clinical research ed)*. 2004;329(7473):1017.
- 46 **386** 18. ter Riet G, Kleijnen J, Knipschild P. Acupuncture and chronic pain: a criteria-based meta-analysis. *Journal of clinical*  
47 **387** *epidemiology*. 1990;43(11):1191-9.  
48
- 49 **388** 19. Miller-Graff LE, Ahmed AH, Paulson JL. Intimate Partner Violence and Breastfeeding Outcomes in a Sample of Low-Income  
50 **389** Women. *Journal of human lactation : official journal of International Lactation Consultant Association*. 2018;34(3):494-502.
- 51 **390** 20. Tiwari S, Gray R, Jenkinson C, Carson C. Association between spousal emotional abuse and reproductive outcomes of women in  
52 **391** India: findings from cross-sectional analysis of the 2005-2006 National Family Health Survey. *Social psychiatry and psychiatric epidemiology*.  
53 **392** 2018;53(5):509-19.  
54
- 55 **393** 21. Wallenborn JT, Cha S, Masho SW. Association Between Intimate Partner Violence and Breastfeeding Duration: Results From  
56 **394** the 2004-2014 Pregnancy Risk Assessment Monitoring System. *Journal of human lactation : official journal of International Lactation Consultant*  
57 **395** *Association*. 2018;34(2):233-41.
- 58 **396** 22. Boyce SC, McDougal L, Silverman JG, Atmavilas Y, Dhar D, Hay K, et al. Associations of intimate partner violence with  
59 **397** postnatal health practices in Bihar, India. *BMC pregnancy and childbirth*. 2017;17(1):398.  
60

- 1  
2  
3  
4 398  
5 399 23. Finnbogadottir H, Thies-Lagergren L. Breastfeeding in the context of domestic violence-a cross-sectional study. *Journal of advanced nursing*. 2017;73(12):3209-19.
- 6  
7 400  
8 401 24. Holland ML, Thevenent-Morrison K, Mittal M, Nelson A, Dozier AM. Breastfeeding and Exposure to Past, Current, and Neighborhood Violence. *Maternal and child health journal*. 2018;22(1):82-91.
- 9 402  
10 403 25. Islam M, Baird K, Mazerolle P, Broidy L. Exploring the influence of psychosocial factors on exclusive breastfeeding in Bangladesh. *Archives of women's mental health*. 2017;20(1):173-88.
- 11  
12 404  
13 405 26. James JP, Taft A, Amir LH, Agius P. Does intimate partner violence impact on women's initiation and duration of breastfeeding? *Breastfeeding review : professional publication of the Nursing Mothers' Association of Australia*. 2014;22(2):11-9.
- 14 406  
15 407 27. Moraes CL, de Oliveira AS, Reichenheim ME, Lobato G. Severe physical violence between intimate partners during pregnancy: a risk factor for early cessation of exclusive breast-feeding. *Public health nutrition*. 2011;14(12):2148-55.
- 16  
17 408  
18 409 28. Shroff MR, Griffiths PL, Suchindran C, Nagalla B, Vazir S, Bentley ME. Does maternal autonomy influence feeding practices and infant growth in rural India? *Social science & medicine (1982)*. 2011;73(3):447-55.
- 19 410  
20 411 29. Lau Y, Chan KS. Influence of intimate partner violence during pregnancy and early postpartum depressive symptoms on breastfeeding among chinese women in Hong Kong. *Journal of midwifery & women's health*. 2007;52(2):e15-e20.
- 21  
22 412  
23 413 30. Silverman JG, Decker MR, Reed E, Raj A. Intimate partner violence around the time of pregnancy: association with breastfeeding behavior. *Journal of women's health (2002)*. 2006;15(8):934-40.
- 24 414  
25 415  
26 416 31. Madsen FK, Holm-Larsen C.E., W., Chunsen, Rogathi, J., Manongi, R., Mushi, D., Meyrowitsch, D. W., Gammeltoft, T., Sigalla, G. N., Rasch, V. . Intimate partner violence and subsequent premature termination of exclusive breastfeeding: A cohort study. *PLOS ONE (in press)* 2019.
- 27  
28 417  
29 418 32. Martin-de-Las-Heras S, Velasco C, Luna-Del-Castillo JD, Khan KS. Breastfeeding avoidance following psychological intimate partner violence during pregnancy: a cohort study and multivariate analysis. *BJOG : an international journal of obstetrics and gynaecology*. 2018.
- 30 419  
31 420 33. Hasselmann MH, Lindsay AC, Surkan PJ, Vianna GV, Werneck GL. Intimate partner violence and early interruption of exclusive breastfeeding in the first three months of life. *Cadernos de saude publica*. 2016;32(10):e00017816.
- 32  
33 421  
34 422 34. Sorbo MF, Lukasse M, Brantsaeter AL, Grimstad H. Past and recent abuse is associated with early cessation of breast feeding: results from a large prospective cohort in Norway. *BMJ open*. 2015;5(12):e009240.
- 35 423  
36 424 35. Khan KS, Ball E, Fox CE, Meads C. Systematic reviews to evaluate causation: an overview of methods and application. *Evidence-based medicine*. 2012;17(5):137-41.
- 37  
38 425  
39 426 36. da Costa BR, Cevallos M, Altman DG, Rutjes AW, Egger M. Uses and misuses of the STROBE statement: bibliographic study. *BMJ open*. 2011;1(1):e000048.
- 40 427  
41 428 37. von Elm E, Altman DG, Egger M, Pocock SJ, Gotsche PC, Vandenbroucke JP. The Strengthening the Reporting of Observational Studies in Epidemiology (STROBE) statement: guidelines for reporting observational studies. *Lancet*. 2007;370(9596):1453-7.
- 42  
43 429  
44 430 38. Stang A. Critical evaluation of the Newcastle-Ottawa scale for the assessment of the quality of nonrandomized studies in meta-analyses. *Eur J Epidemiol*. 2010;25(9):603-5.
- 45 431  
46 432 39. Luchini CS, B.; Solmi, M.; Veronese, N. . Assessing the quality of studies in meta-analyses: Advantages and limitations of the New Castle Ottawa Scale *World Journal of Meta-Analysis* 2017.
- 47  
48 433  
49 434 40. Widom CS, Czaja SJ, Dutton MA. Childhood victimization and lifetime revictimization. *Child abuse & neglect*. 2008;32(8):785-96.
- 50 435  
51 436 41. Elfgén C, Hagenbuch N, Gorres G, Block E, Leeners B. Breastfeeding in Women Having Experienced Childhood Sexual Abuse. *Journal of human lactation : official journal of International Lactation Consultant Association*. 2017;33(1):119-27.
- 52  
53 437  
54 438 42. Eagen-Torkko M, Low LK, Zielinski R, Seng JS. Prevalence and Predictors of Breastfeeding After Childhood Abuse. *Journal of obstetric, gynecologic, and neonatal nursing : JOGNN*. 2017;46(3):465-79.
- 55 439  
56 440 43. Gracia E. Unreported cases of domestic violence against women: towards an epidemiology of social silence, tolerance, and inhibition. *Journal of epidemiology and community health*. 2004;58(7):536-7.
- 57  
58 441  
59 442 44. Henderson JJ, Evans SF, Straton JA, Priest SR, Hagan R. Impact of postnatal depression on breastfeeding duration. *Birth*. 2003;30(3):175-80.
- 60

1  
2  
3  
4  
5  
6  
7  
8  
9  
10  
11  
12  
13  
14  
15  
16  
17  
18  
19  
20  
21  
22  
23  
24  
25  
26  
27  
28  
29  
30  
31  
32  
33  
34  
35  
36  
37  
38  
39  
40  
41  
42  
43  
44  
45  
46  
47  
48  
49  
50  
51  
52  
53  
54  
55  
56  
57  
58  
59  
60

443  
444

45. Hatton DC, Harrison-Hohner J, Coste S, Dorato V, Curet LB, McCarron DA. Symptoms of postpartum depression and breastfeeding. *Journal of human lactation : official journal of International Lactation Consultant Association*. 2005;21(4):444-9; quiz 50-4.

445  
446

46. Stuebe AM, Grewen K, Pedersen CA, Propper C, Meltzer-Brody S. Failed lactation and perinatal depression: common problems with shared neuroendocrine mechanisms? *Journal of women's health* (2002). 2012;21(3):264-72.

447  
448

47. Williamson PR, Altman, D.G., Bagley, H. et al. The COMET Handbook: version 1.0 The COMET Handbook: version 1.0. *Trials* 18, 280 2017.

449  
450

48. Rogozinska E, Marlin N, Thangaratinam S, Khan KS, Zamora J. Meta-analysis using individual participant data from randomised trials: opportunities and limitations created by access to raw data. *Evidence-based medicine*. 2017;22(5):157-62.

451

452

453

### Figure legends

454

Figure 1 **Flow chart of study selection in the review of intimate partner violence and breastfeeding outcomes**

456

Figure 2 **Study quality of cohort and cross-sectional studies in the review of intimate partner violence and**

457

**breastfeeding outcomes**

458

Figure 3 **Results of physical violence and the association with breastfeeding duration, breastfeeding initiation and exclusive breastfeeding presented in a Forest plot ordered according to descending quality**

459

1  
2  
3  
4  
5  
6  
7  
8  
9  
10  
11  
12  
13  
14  
15  
16  
17  
18  
19  
20  
21  
22  
23  
24  
25  
26  
27  
28  
29  
30  
31  
32  
33  
34  
35  
36  
37  
38  
39  
40  
41  
42  
43  
44  
45  
46  
47  
48  
49  
50  
51  
52  
53  
54  
55  
56  
57  
58  
59  
60

For peer review only

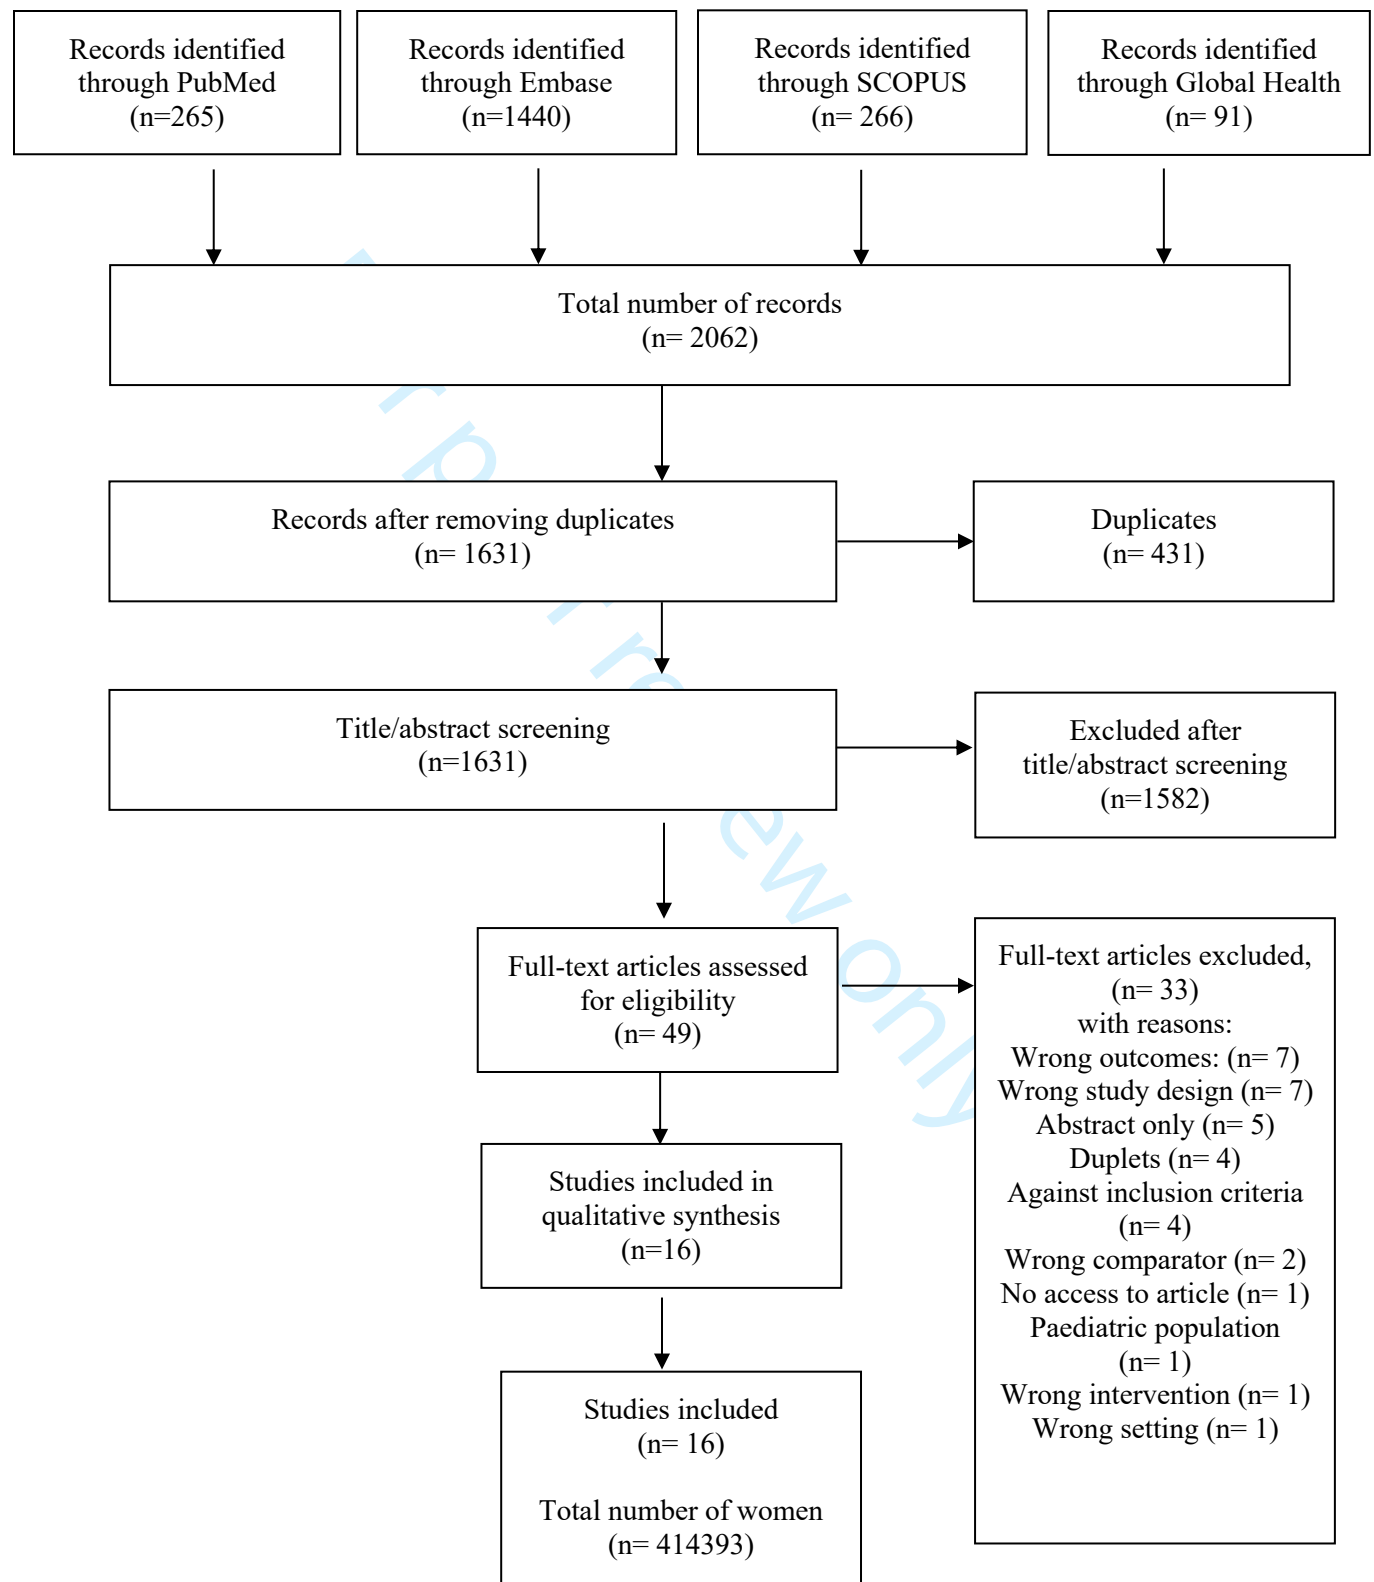

**Figure 2: Study quality of cohort and cross-sectional studies in the review of intimate partner violence and breastfeeding outcomes**

### Cohort studies

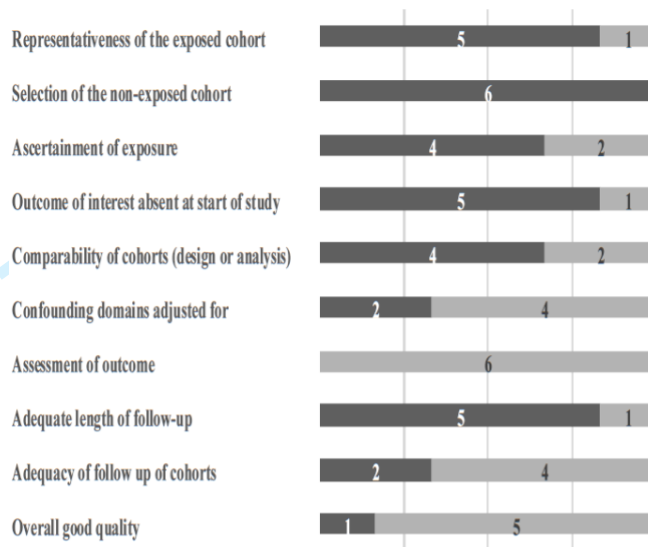

### Cross-sectional studies

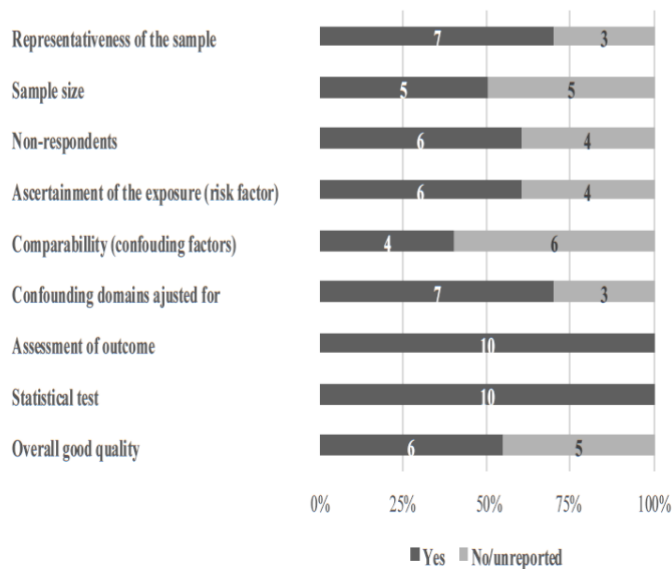

In the figure illustration of the NOS scale, the studies, which reached a maximum of stars in each category of the NOS-scale was rewarded a 'yes' and further if the studies adjusted for more than four confounding domains, they were rewarded a 'yes' (see appendix S2.2)

**Figure 3: Results of physical violence and association with breastfeeding duration, breastfeeding initiation and exclusive breastfeeding presented in a Forest plot ordered according to descending quality**

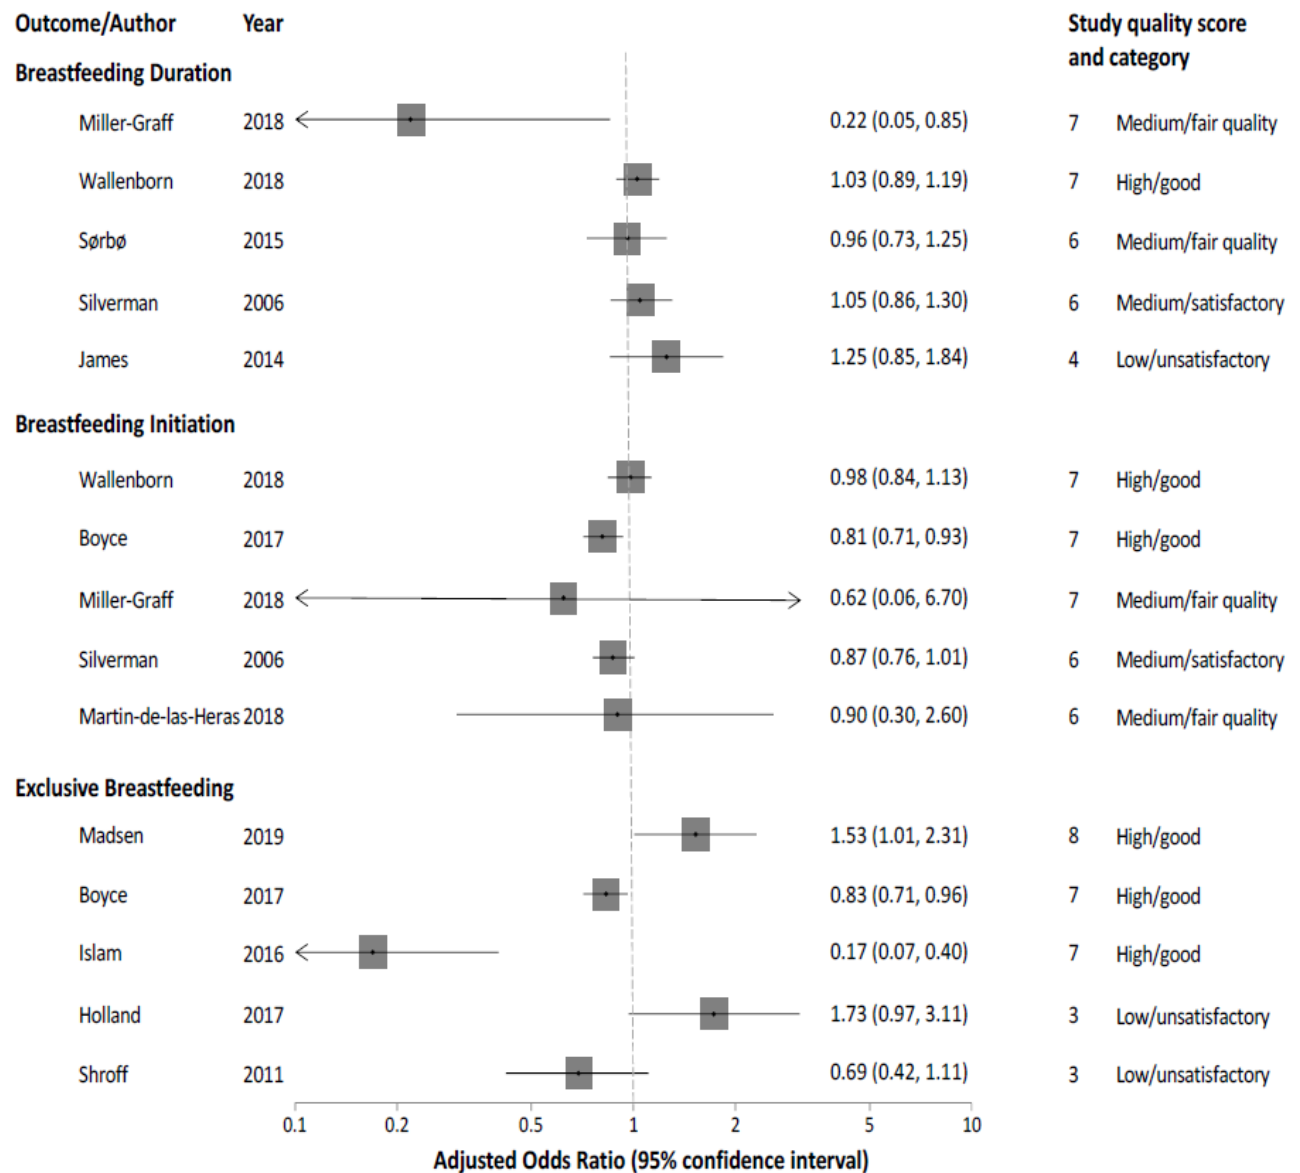

## Appendix, S1: Search strategy

Embase search: Searched on the 11<sup>th</sup> of March with a total result of 1382 articles

| #ID | Search                                                                                                                                                                                                                             |
|-----|------------------------------------------------------------------------------------------------------------------------------------------------------------------------------------------------------------------------------------|
| 1   | Exp partner violence/                                                                                                                                                                                                              |
| 2   | Exp domestic violence/                                                                                                                                                                                                             |
| 3   | Exp physical abuse/                                                                                                                                                                                                                |
| 4   | Exp battered woman/                                                                                                                                                                                                                |
| 5   | Exp breast feeding/                                                                                                                                                                                                                |
| 6   | Exp breast milk expression/                                                                                                                                                                                                        |
| 7   | Exp feeding behavior                                                                                                                                                                                                               |
| 8   | Exp lactation                                                                                                                                                                                                                      |
| 9   | Exp milk ejection                                                                                                                                                                                                                  |
| 10  | "intimate partner violence"                                                                                                                                                                                                        |
| 11  | "dating violence"                                                                                                                                                                                                                  |
| 12  | "partner violence"                                                                                                                                                                                                                 |
| 13  | "partner homicide"                                                                                                                                                                                                                 |
| 14  | "psychological violence"                                                                                                                                                                                                           |
| 15  | "psychological abuse"                                                                                                                                                                                                              |
| 16  | "spouse abuse"                                                                                                                                                                                                                     |
| 17  | "spousal abuse"                                                                                                                                                                                                                    |
| 18  | "wife abuse"                                                                                                                                                                                                                       |
| 19  | "partner abuse"                                                                                                                                                                                                                    |
| 20  | "domestic violence"                                                                                                                                                                                                                |
| 21  | "family violence"                                                                                                                                                                                                                  |
| 22  | "physical abuse"                                                                                                                                                                                                                   |
| 23  | "physical violence"                                                                                                                                                                                                                |
| 24  | "physical maltreatment"                                                                                                                                                                                                            |
| 25  | "sex offenses"                                                                                                                                                                                                                     |
| 26  | "sexual violence"                                                                                                                                                                                                                  |
| 27  | "sexual harm"                                                                                                                                                                                                                      |
| 28  | "sexual coercion"                                                                                                                                                                                                                  |
| 29  | "battered woman"                                                                                                                                                                                                                   |
| 30  | "battered women"                                                                                                                                                                                                                   |
| 31  | "abused women"                                                                                                                                                                                                                     |
| 32  | "abused woman"                                                                                                                                                                                                                     |
| 33  | "relationship violence"                                                                                                                                                                                                            |
| 34  | "relationship aggression"                                                                                                                                                                                                          |
| 35  | "couple violence"                                                                                                                                                                                                                  |
| 36  | "spousal violence"                                                                                                                                                                                                                 |
| 37  | "domestic abuse"                                                                                                                                                                                                                   |
| 38  | "wife beating"                                                                                                                                                                                                                     |
| 39  | "physical harm"                                                                                                                                                                                                                    |
| 40  | "physical aggression"                                                                                                                                                                                                              |
| 41  | "emotional violence"                                                                                                                                                                                                               |
| 42  | "emotional abuse"                                                                                                                                                                                                                  |
| 43  | "emotional harm"                                                                                                                                                                                                                   |
| 44  | "violence against women"                                                                                                                                                                                                           |
| 45  | 1 or 2 or 3 or 4 or 10 or 11 or 12 or 13 or 14 or 15 or 16 or 17 or 18 or 19 or 20 or 21 or 22 or 23 or 24 or 25 or 26 or 27 or 28 or 29 or 30 or 31 or 32 or 33 or 34 or 35 or 36 or 37 or 38 or 39 or 40 or 41 or 42 or 43 or 44 |
| 46  | Exp sexual abuse                                                                                                                                                                                                                   |
| 47  | Controlling behavior                                                                                                                                                                                                               |
| 48  | 45 or 46 or 47                                                                                                                                                                                                                     |
| 49  | "sexual abuse"                                                                                                                                                                                                                     |
| 50  | 48 or 49                                                                                                                                                                                                                           |
| 51  | "exclusive breastfeeding"                                                                                                                                                                                                          |
| 52  | "breastfeeding duration"                                                                                                                                                                                                           |
| 53  | "breastfeeding intention"                                                                                                                                                                                                          |
| 54  | "pumping breast"                                                                                                                                                                                                                   |
| 55  | "human milk"                                                                                                                                                                                                                       |
| 56  | "breast milk"                                                                                                                                                                                                                      |
| 57  | "milk secretion"                                                                                                                                                                                                                   |
| 58  | "milk let-down"                                                                                                                                                                                                                    |
| 59  | 5 or 6 or 7 or 8 or 51 or 52 or 53 or 54 or 55 or 57 or 58                                                                                                                                                                         |
| 60  | Feeding behavior                                                                                                                                                                                                                   |
| 61  | Feeding pattern                                                                                                                                                                                                                    |
| 62  | "feeding patterns"                                                                                                                                                                                                                 |



|    |                                                                      |
|----|----------------------------------------------------------------------|
| 63 | 59 or 60 or 61 or 62                                                 |
| 64 | Feeding behaviors                                                    |
| 65 | 63 or 64                                                             |
| 66 | "exclusive breast feeding"                                           |
| 67 | "exclusive breast feedings"                                          |
| 68 | "breast feedings"                                                    |
| 69 | "breast feeding"                                                     |
| 70 | "breastmilk expression"                                              |
| 71 | "breastmilk expressions"                                             |
| 72 | "milk collection"                                                    |
| 73 | "milk collections"                                                   |
| 74 | "breast pumping"                                                     |
| 75 | "milk secretion"                                                     |
| 76 | "milk secretions"                                                    |
| 77 | 65 or 66 or 67 or 68 or 69 or 70 or 71 or 72 or 73 or 74 or 75 or 76 |
| 78 | Lactations                                                           |
| 79 | Lactation                                                            |
| 80 | 77 or 78 or 79                                                       |
| 81 | 50 and 80                                                            |

**Global Health Library search: Searched on the 12<sup>th</sup> of March with a total result of 91 articles**

| #ID | Search                                                                                                                                                                            |
|-----|-----------------------------------------------------------------------------------------------------------------------------------------------------------------------------------|
| S1  | "intimate partner violence" OR "dating violence" OR "partner violence" OR "partner homicide" OR "psychological abuse" OR "psychological violence"                                 |
| S2  | "spouse abuse" OR "spousal abuse" OR "wife abuse" OR "partner abuse"                                                                                                              |
| S3  | S3 OR S2                                                                                                                                                                          |
| S4  | "domestic violence" OR "family violence"                                                                                                                                          |
| S5  | S4 OR S3                                                                                                                                                                          |
| S6  | "physical abuse" OR "physical violence" OR "physical maltreatment"                                                                                                                |
| S7  | S6 OR S5                                                                                                                                                                          |
| S8  | "sexual assault" OR "sex offenses" OR "sexual violence" OR "sexual abuse" OR "sexual harm" OR "sexual coercion"                                                                   |
| S9  | S8 OR S7                                                                                                                                                                          |
| S10 | "battered woman" OR "battered women" OR "abused woman" OR "abused women"                                                                                                          |
| S11 | S10 OR S9                                                                                                                                                                         |
| S12 | "relationship violence" OR "relationship aggression" OR "couple violence" OR "spousal violence" OR "domestic abuse" OR "wife beating" OR "physical harm" OR "physical aggression" |
| S13 | S12 OR S11                                                                                                                                                                        |
| S14 | "emotional violence" OR "emotional abuse" OR "emotional harm" OR "controlling behaviour" OR "violence against women"                                                              |
| S15 | S14 OR S13                                                                                                                                                                        |
| S16 | "breast feeding" OR "breastfeeding" OR "exclusive breast feeding" OR "exclusive breastfeeding" OR "breastfeeding duration" OR "breastfeeding intention"                           |
| S17 | "breast milk expression" OR "breast milk expressions" OR "milk collection" OR "milk collections" OR "breast pumping" OR "pumping breast"                                          |
| S18 | S17 OR S16                                                                                                                                                                        |
| S19 | "feeding behaviour" OR "feeding behaviors" OR "feeding pattern" OR "feeding patterns" OR "human milk" OR "milk, human"                                                            |
| S20 | S19 OR S18                                                                                                                                                                        |
| S21 | Lactation OR lactations OR "milk secretion" OR "milk secretions" OR "milk ejection" OR "milk let-down"                                                                            |
| S22 | S21 OR S20                                                                                                                                                                        |
| S23 | S22 AND S15                                                                                                                                                                       |

**PubMed search: Searched on the 8<sup>th</sup> of March with a total result of 253 articles**

((((((((((("Breast Feeding"[Mesh]) OR breastfeeding) OR exclusive breast fe\*) OR "exclusive breastfeeding") OR "breastfeeding duration") OR breast fe\*) OR "breastfeeding intention")) OR (((("Breast Milk Expression"[Mesh]) OR breast milk expression\*) OR breastmilk expression\*) OR milk collection\*) OR breast pumping\*) OR "pumping breast")) OR (((("Feeding Behavior"[Mesh]) OR feeding behavior\*) OR feeding pattern\*)) OR ((("Milk, Human"[Mesh]) OR "human milk")) OR (((("Lactation"[Mesh]) OR milk secretion\*) OR lactation\*)) OR ((("Milk Ejection"[Mesh]) OR "milk let-down")) AND (((((((((((((((("relationship violence") OR "relationship aggression") OR "couple violence") OR "spousal violence") OR "domestic abuse") OR "wife beating") OR "physical harm") OR "physical aggression") OR "emotional violence") OR "emotional abuse") OR "emotional harm") OR controlling behavior\*) OR "violence against women")) OR (((("Battered Women"[Mesh]) OR "Battered Woman") OR "abused women") OR "abused woman")) OR (((("Sex Offenses"[Mesh]) OR "sex offenses") OR "sexual violence") OR sexual abuse\*) OR "sexual harm") OR "sexual coercion")) OR (((("Physical Abuse"[Mesh]) OR "physical abuse") OR "physical violence") OR "physical maltreatment")) OR (((("Domestic Violence"[Mesh]) OR "domestic violence") OR "family violence")) OR (((("Spouse

Abuse"[Mesh]) OR "spouse abuse") OR "spousal abuse") OR "wife abuse") OR "partner abuse")) OR ((((((("Intimate Partner Violence"[Mesh]) OR "intimate partner violence") OR "dating violence") OR "partner violence") OR "partner homicide") OR "psychological violence") OR "psychological abuse"))

**SCOPUS: Searched on the 11<sup>th</sup> of March with a total result of 257 articles**

(((((TITLE-ABS-KEY("breast feeding")) OR (TITLE-ABS-KEY("breastfeeding intention")))) OR ((TITLE-ABS-KEY(breastfeeding)) OR (TITLE-ABS-KEY("breastfeeding duration" ))) OR ((TITLE-ABS-KEY("exclusive breast feeding" )) OR (TITLE-ABS-KEY("exclusive breastfeeding" )))) OR ((TITLE-ABS-KEY("breast milk expression")) OR (TITLE-ABS-KEY("breast milk expressions" )) OR (TITLE-ABS-KEY("breastmilk expression" )) OR (TITLE-ABS-KEY("breastmilk expressions")) OR (TITLE-ABS-KEY("milk collections" )) OR (TITLE-ABS-KEY("milk collection")) OR (TITLE-ABS-KEY("breast pumping" )) OR (TITLE-ABS-KEY("pumping breast")) OR ((TITLE-ABS-KEY("feeding behavior" )) OR (TITLE-ABS-KEY("feeding pattern")) OR (TITLE-ABS-KEY("human milk" )) OR (TITLE-ABS-KEY("milk, human")) OR (TITLE-ABS-KEY("breast milk")) OR ((TITLE-ABS-KEY(lactation)) OR (TITLE-ABS-KEY("milk secretion" )) OR (TITLE-ABS-KEY("milk ejection")) OR (TITLE-ABS-KEY("milk let-down")))) AND (((TITLE-ABS-KEY("intimate partner violence")) OR (TITLE-ABS-KEY("dating violence" )) OR (TITLE-ABS-KEY("partner violence" )) OR (TITLE-ABS-KEY("partner homicide")) OR (TITLE-ABS-KEY("psychological violence" )) OR (TITLE-ABS-KEY("psychological abuse" ))) OR (((TITLE-ABS-KEY("spouse abuse")) OR (TITLE-ABS-KEY("spousal abuse" ))) OR (TITLE-ABS-KEY("wife abuse" )) OR (TITLE-ABS-KEY("partner abuse" ))) OR ((TITLE-ABS-KEY("domestic violence" )) OR (TITLE-ABS-KEY("family violence" )) OR (TITLE-ABS-KEY("physical abuse" )) OR (TITLE-ABS-KEY("physical violence" )) OR (TITLE-ABS-KEY("physical maltreatment")) OR ((TITLE-ABS-KEY("sex offenses" )) OR (TITLE-ABS-KEY("sexual violence")) OR (TITLE-ABS-KEY("sexual abuse")) (TITLE-ABS-KEY("sexual harm" )) OR (TITLE-ABS-KEY("sexual coercion" ))) OR (((TITLE-ABS-KEY("battered women" )) OR (TITLE-ABS-KEY("battered woman")) OR ((TITLE-ABS-KEY("abused woman" )) OR (TITLE-ABS-KEY("abused women")))) OR (((TITLE-ABS-KEY("relationship aggression")) OR (TITLE-ABS-KEY("couple violence" )) OR (TITLE-ABS-KEY("relationship violence" ))) OR (TITLE-ABS-KEY("spousal violence")) OR ((TITLE-ABS-KEY("domestic violence" )) OR (TITLE-ABS-KEY("wife beating" )) OR (TITLE-ABS-KEY("physical harm" )) OR (TITLE-ABS-KEY("physical aggression" ))) OR ((TITLE-ABS-KEY("emotional violence" )) OR (TITLE-ABS-KEY("emotional abuse")) OR (TITLE-ABS-KEY("emotional harm")) OR (TITLE-ABS-KEY("controlling behavior" ))) OR (TITLE-ABS-KEY("violence against women" )))

Appendix, S2: Data synthesis tables

Table S2.1: Results of NOS quality assessment

| Cohort studies                    |                                          |                                     |                           |                                                                          |                                                                                                                                    |                                               |                           |                                                 |                                  |              |                                        |
|-----------------------------------|------------------------------------------|-------------------------------------|---------------------------|--------------------------------------------------------------------------|------------------------------------------------------------------------------------------------------------------------------------|-----------------------------------------------|---------------------------|-------------------------------------------------|----------------------------------|--------------|----------------------------------------|
| Study                             | Selection (maximum 4 stars)              |                                     |                           |                                                                          | Comparability (maximum 2 stars)                                                                                                    |                                               | Outcome (maximum 3 stars) |                                                 |                                  | No. of stars | No. of stars with domains adjusted for |
|                                   | Representativeness of the exposed cohort | Selection of the non-exposed cohort | Ascertainment of exposure | Demonstration that outcome of interest was not present at start of study | Comparability of cohorts on the basis of the design or analysis                                                                    | Confounding domains adjusted for (table S2.1) | Assessment of outcome     | Was follow-up long enough for outcomes to occur | Adequacy of follow up of cohorts |              |                                        |
| Madsen, 2019                      | *                                        | *                                   | *                         | *                                                                        | **                                                                                                                                 | **                                            | -                         | *                                               | *                                | 8            | 10                                     |
| Martin-de-las-heras, 2018         | *                                        | *                                   | *                         | *                                                                        | **                                                                                                                                 | *****                                         | -                         | -                                               | -                                | 6            | 12                                     |
| Miller-Graff, 2018                | -                                        | *                                   | *                         | *                                                                        | **                                                                                                                                 | ****                                          | -                         | *                                               | *                                | 7            | 11                                     |
| Finnbogadottir, 2017 <sup>A</sup> | *                                        | *                                   | -                         | *                                                                        | -                                                                                                                                  | -                                             | -                         | *                                               | -                                | 4            | 4                                      |
| Hasselmann, 2016                  | *                                        | *                                   | *                         | -                                                                        | -                                                                                                                                  | ***                                           | -                         | *                                               | -                                | 4            | 7                                      |
| Sørnbø, 2015                      | *                                        | *                                   | -                         | *                                                                        | **                                                                                                                                 | ***                                           | -                         | *                                               | -                                | 6            | 9                                      |
| Cross-sectional studies           |                                          |                                     |                           |                                                                          |                                                                                                                                    |                                               |                           |                                                 |                                  |              |                                        |
| Study                             | Selection (maximum 5 stars)              |                                     |                           |                                                                          | Comparability (maximum 2 stars)                                                                                                    |                                               | Outcome (maximum 3 stars) |                                                 | No. of stars                     |              |                                        |
|                                   | Representativeness of the sample         | Sample size                         | Non-respondents           | Ascertainment of the exposure (risk factor)                              | The subjects in different outcome groups are comparable, based on the study design or analysis. Confounding factors are controlled | Confounding domains adjusted for (table S2.1) | Assessment of outcome     | Statistical test                                |                                  |              |                                        |
| Tiwari, 2018                      | *                                        | *                                   | *                         | **                                                                       | *                                                                                                                                  | ****                                          | *                         | *                                               | 8                                | 12           |                                        |
| Wallenborn, 2018                  | *                                        | *                                   | -                         | **                                                                       | *                                                                                                                                  | *****                                         | *                         | *                                               | 7                                | 12           |                                        |
| Boyce, 2017                       | *                                        | *                                   | *                         | **                                                                       | -                                                                                                                                  | -                                             | *                         | *                                               | 7                                | 7            |                                        |
| Holland, 2017                     | -                                        | -                                   | -                         | *                                                                        | -                                                                                                                                  | ****                                          | *                         | *                                               | 3                                | 7            |                                        |
| Islam, 2016                       | *                                        | -                                   | *                         | *                                                                        | **                                                                                                                                 | *****<br>*                                    | *                         | *                                               | 7                                | 16           |                                        |
| James, 2014                       | -                                        | -                                   | -                         | **                                                                       | -                                                                                                                                  | ***                                           | *                         | *                                               | 4                                | 7            |                                        |

1  
2  
3  
4  
5  
6  
7  
8  
9  
10  
11  
12  
13  
14  
15  
16  
17  
18  
19  
20  
21  
22  
23  
24  
25  
26  
27  
28  
29  
30  
31  
32  
33  
34  
35  
36  
37  
38  
39  
40  
41  
42  
43  
44  
45  
46  
47  
48  
49  
50  
51  
52  
53  
54  
55  
56  
57  
58  
59  
60

|                 |   |   |   |    |    |       |   |   |   |    |
|-----------------|---|---|---|----|----|-------|---|---|---|----|
| Moraes, 2011    | * | - | * | ** | ** | ****  | * | * | 8 | 12 |
| Shroff, 2011    | - | - | - | *  | -  | ***** | * | * | 3 | 8  |
| Lau, 2007       | * | * | * | ** | -  | ***** | * | * | 7 | 12 |
| Silverman, 2006 | * | * | * | *  | -  | ***   | * | * | 6 | 9  |

A Cross-sectional study embedded from a cohort. Analyzed with NOS for cohort.

For peer review only

Table S2.2: Confounders adjusted for in studies

| Reference                      | Domain  |                               |                                        |                            |                       |                              |                                     |                                   |                     |                    | Outcome                                  |
|--------------------------------|---------|-------------------------------|----------------------------------------|----------------------------|-----------------------|------------------------------|-------------------------------------|-----------------------------------|---------------------|--------------------|------------------------------------------|
|                                | Economy | Maternal lifestyle and health | Pregnancy/post partum related problems | Maternal socio-demographic | Child characteristics | Relationship characteristics | Support during pregnancy/postpartum | Violence or stressful life events | Pregnancy intention | Caste and religion |                                          |
| Madsen, 2019 (35)              |         | x                             |                                        | x                          |                       |                              |                                     |                                   |                     |                    | Premature termination of exclusive BF    |
| Martin-de-las-Heras, 2018 (36) |         | x                             | x                                      | x                          |                       | x                            | x                                   |                                   | x                   |                    | BF avoidance (initiation)                |
| Miller-Graff, 2018 (18)        | x       |                               | x                                      |                            |                       |                              | x                                   | x                                 |                     |                    | BF exclusivity, initiation and cessation |
| Tiwari, 2018 (22)              | x       |                               |                                        | x                          |                       | x                            |                                     | x                                 |                     | x                  | BF duration                              |
| Wallenborn, 2018 (23)          | x       |                               |                                        | x                          |                       | x                            |                                     | x                                 | x                   |                    | BF initiation and duration               |
| Boyce, 2017* (24)              |         |                               |                                        |                            |                       |                              |                                     |                                   |                     |                    | Early BF initiation and exclusivity      |
| Finnbogadottir, 2017 (25)      | NA      | NA                            | NA                                     | NA                         | NA                    | NA                           | NA                                  | NA                                | NA                  | NA                 | Exclusive BF                             |
| Holland, 2017 (26)             |         | x                             | x                                      | x                          |                       |                              |                                     | x                                 |                     |                    | BF initiation, duration and exclusivity  |
| Hasselmann, 2016 (20)          |         |                               |                                        | x                          | x                     | x                            |                                     |                                   |                     |                    | Interruption of exclusive BF             |
| Islam, 2016 (27)               | x       | x                             | x                                      | x                          | x                     | x                            | x                                   | x                                 | x                   |                    | Exclusive BF                             |
| Sørbo, 2015 (21)               |         |                               |                                        | x                          |                       | x                            |                                     | x                                 |                     |                    | Early cessation of any BF                |
| James, 2014 (28)               | x       |                               | x                                      | x                          |                       |                              |                                     |                                   |                     |                    | BF duration                              |
| Moraes, 2011 (29)              |         | x                             |                                        | x                          | x                     |                              | x                                   |                                   |                     |                    | Early cessation of exclusive BF          |
| Shroff, 2011 (30)              |         | x                             |                                        | x                          | x                     | x                            |                                     |                                   |                     | x                  | Exclusive BF                             |
| Lau, 2007 (31)                 |         | x                             | x                                      | x                          |                       | x                            |                                     |                                   | x                   |                    | Breastfeeding and mixed feeding          |
| Silverman, 2006 (32)           |         | x                             |                                        | x                          |                       | x                            |                                     |                                   |                     |                    | BF initiation and early cessation        |

\*Article states that the association between IPV and BF was adjusting for any covariate that were significant at  $p < 0,20$  levels in bivariate analysis, but results not shown

NA (not applicable)

#### Explanation of following groups of confounders:

Economy: Insurance and receipt of government assistance

Maternal lifestyle and health: Smoking, substance use prior to pregnancy, substance use all time, maternal health status, mothers BMI, HIV status

Pregnancy and postpartum related problems: Pregnancy health problems, preterm labor, mode of birth, complications during birth, mother/infant separation after birth, antenatal complications, postnatal complications, reasons for stopping BF and resuscitation

1  
2  
3  
4  
5  
6  
7  
8  
9  
10  
11  
12  
13  
14  
15  
16  
17  
18  
19  
20  
21  
22  
23  
24  
25  
26  
27  
28  
29  
30  
31  
32  
33  
34  
35  
36  
37  
38  
39  
40  
41  
42  
43  
44  
45  
46  
47  
48  
49  
50  
51  
52  
53  
54  
55  
56  
57  
58  
59  
60

Maternal sociodemographic: Maternal age, maternal education, maternal race/ethnicity, first baby/number of the child, employment status, place of residence, parity, occupation, number of years lived in the U.S and language  
Child characteristics: Gender of child, age of child, low birthweight/birth weight, child health  
Relationship characteristics: Marital status, relationship characteristics, partner's education level, family structure, cohabitation  
Support during pregnancy and postpartum: Prenatal BF education, number of antenatal care visits/health care services, kin support, social support, type of maternity clinic  
Violence or stressful life events: Stressful live events 12 months before pregnancy, depression, childhood abuse, other forms of IPV  
Pregnancy intention  
Caste and religion

For peer review only

**Table S2.3: Early cessation/shortened duration of breastfeeding (aOR; 95% CI) vs. no cessation of breastfeeding**

| Reference                      | Exposed to IPV* prior to pregnancy                                                                       | Exposed to IPV* during pregnancy/post-partum | Exposed to any IPV** prior to pregnancy                                                                                                                                                                                                                                                               | Exposed to any IPV** during pregnancy/post-partum |
|--------------------------------|----------------------------------------------------------------------------------------------------------|----------------------------------------------|-------------------------------------------------------------------------------------------------------------------------------------------------------------------------------------------------------------------------------------------------------------------------------------------------------|---------------------------------------------------|
| Madsen, 2019 (35)              |                                                                                                          |                                              |                                                                                                                                                                                                                                                                                                       |                                                   |
| Martin-de-las-Heras, 2018 (36) |                                                                                                          |                                              |                                                                                                                                                                                                                                                                                                       |                                                   |
| Miller-Graff, 2018 (18)        | P + E + S: 0.22 (0.05-0.85) <sup>A</sup>                                                                 |                                              |                                                                                                                                                                                                                                                                                                       |                                                   |
| Tiwari, 2018 (22)              | E: 1.07 (0.81-1.41) <sup>B</sup>                                                                         |                                              |                                                                                                                                                                                                                                                                                                       |                                                   |
| Wallenborn, 2018 (23)          | P: 1.18 (1.01-1.37) <sup>L</sup>                                                                         | P: 1.15 (0.94-1.4) <sup>L</sup>              |                                                                                                                                                                                                                                                                                                       |                                                   |
|                                | P: 1.03 (0.89-1.19) <sup>L</sup>                                                                         |                                              |                                                                                                                                                                                                                                                                                                       |                                                   |
| Boyce, 2017 (24)               |                                                                                                          |                                              |                                                                                                                                                                                                                                                                                                       |                                                   |
| Finnbogadottir, 2017 (25)      |                                                                                                          |                                              |                                                                                                                                                                                                                                                                                                       |                                                   |
| Holland, 2017 (26)             |                                                                                                          |                                              | P + E + S: 5.92 (1.72-27.98) <sup>C,D,F,O</sup><br>P + E + S: 3.33 (1.46-8) <sup>C,E,F,O</sup><br>P + E + S: 0.66 (0.25-1.59) <sup>C,D,G,O</sup><br>P + E + S: 0.93 (0.54-1.58) <sup>C,E,G,O</sup><br>P + E + S 0.68 (0.25-1.72) <sup>C,D,H,O</sup><br>P + E + S: 0.87 (0.44-1.68) <sup>C,E,H,O</sup> |                                                   |
| Hasselmann, 2016 (20)          |                                                                                                          |                                              |                                                                                                                                                                                                                                                                                                       |                                                   |
| Islam, 2016 (27)               |                                                                                                          |                                              |                                                                                                                                                                                                                                                                                                       |                                                   |
| Sørbo, 2015 (21)               | P: 0.96 (0.73-1.25) <sup>M</sup><br>E: 1.28 (1.18-1.39) <sup>M</sup><br>S: 0.94 (0.76-1.16) <sup>M</sup> |                                              | P + E + S: 1.47 (1.23-1.76) <sup>M</sup><br>P + E: 1.39 (1.18-1.39) <sup>M</sup><br>P + S: 0.95 (0.61-1.47) <sup>M</sup><br>S + E: 1.27 (1.02-1.58) <sup>M</sup>                                                                                                                                      |                                                   |
| James, 2014 (28)               | P + E + S: 1.25 (0.85-1.84) <sup>I,J</sup><br>P + E + S: 1.01 (0.8-1.29) <sup>I,K</sup>                  |                                              |                                                                                                                                                                                                                                                                                                       |                                                   |
| Moraes, 2011 (29)              |                                                                                                          |                                              |                                                                                                                                                                                                                                                                                                       |                                                   |
| Shroff, 2011 (30)              |                                                                                                          |                                              |                                                                                                                                                                                                                                                                                                       |                                                   |
| Lau, 2007 (31)                 |                                                                                                          |                                              |                                                                                                                                                                                                                                                                                                       |                                                   |
| Silverman, 2006 (32)           |                                                                                                          |                                              | P + E: 0.94 (0.76-1.7) <sup>D</sup>                                                                                                                                                                                                                                                                   | P + E: 0.97 (0.72-1.3) <sup>D</sup>               |
|                                | P + E: 1.05 (0.86-1.3) <sup>D</sup>                                                                      |                                              |                                                                                                                                                                                                                                                                                                       |                                                   |

\* IPV measured as physical (P), or emotional (E) or sexual (S)

\*\* IPV measured as physical (P), emotional/psychological/mental (M) and sexual (S) combined

<sup>A</sup> Crude OR (measured as effect of IPV exposure the past year and interpreted as lower likelihood of continuing BF at 6 weeks)

<sup>B</sup> At least one month of BF

<sup>C</sup> HR interpreted as the probability of stopping BF

<sup>D</sup> Duration at 4 weeks

<sup>E</sup> Duration at 13 weeks

<sup>F</sup> White women

<sup>G</sup> Black women

<sup>H</sup> Hispanic women

<sup>I</sup> Interpreted as likelihood of BF at the time measured

<sup>J</sup> BF at 3 months

<sup>K</sup> BF at 6 months

1  
2  
3  
4  
5  
6  
7  
8  
9  
10  
11  
12  
13  
14  
15  
16  
17  
18  
19  
20  
21  
22  
23  
24  
25  
26  
27  
28  
29  
30  
31  
32  
33  
34  
35  
36  
37  
38  
39  
40  
41  
42  
43  
44  
45  
46  
47  
48  
49  
50  
51  
52  
53  
54  
55  
56  
57  
58  
59  
60

- L BF at 1-8 weeks
- M BF < 4 weeks
- o Interview of participants included items about the preprancy, prenatal and postpartum period

For peer review only



**Table S2.4: Initiation of breastfeeding (aOR; 95% CI) vs. no initiation of breastfeeding**

| Reference                         | Exposed to IPV*<br>prior to<br>pregnancy                             | Exposed to IPV*<br>during<br>pregnancy/post-<br>partum       | Exposed to any IPV**<br>prior to pregnancy                                                                                    | Exposed to any IPV** during<br>pregnancy/post-partum |
|-----------------------------------|----------------------------------------------------------------------|--------------------------------------------------------------|-------------------------------------------------------------------------------------------------------------------------------|------------------------------------------------------|
| Madsen, 2019 (35)                 |                                                                      |                                                              |                                                                                                                               |                                                      |
| Martin-de-las-Heras,<br>2018 (36) |                                                                      | E: 2 (1.2-3.3) <sub>B</sub><br>P: 0.9 (0.3-2.6) <sub>B</sub> |                                                                                                                               |                                                      |
| Miller-Graff, 2018 (18)           | P + E + S: 0.62 (0.06-6.7) <sub>A</sub>                              |                                                              |                                                                                                                               |                                                      |
| Tiwari, 2018 (22)                 |                                                                      |                                                              |                                                                                                                               |                                                      |
| Wallenborn, 2018 (23)             | P: 1.05 (0.9-1.23)                                                   | P: 0.9 (0.73-1.11)                                           |                                                                                                                               |                                                      |
|                                   | P: 0.98 (0.84-1.13)                                                  |                                                              |                                                                                                                               |                                                      |
| Boyce, 2017 (24)                  | P: 0.81 (0.71-0.93) <sub>C</sub><br>S: 0.52 (0.36-0.76) <sub>C</sub> |                                                              | P + S: 0.83 (0.67-1.01) <sub>C</sub>                                                                                          |                                                      |
| Finnbogadottir, 2017 (25)         |                                                                      |                                                              |                                                                                                                               |                                                      |
| Holland, 2017 (26)                |                                                                      |                                                              | P + E + S: 2.3 (0.7-7.2) <sub>D,E</sub><br>P + E + S: 1.8 (0.9-3.9) <sub>D,F</sub><br>P + E + S: 0.9 (0.2-3.8) <sub>D,G</sub> |                                                      |
| Hasselmann, 2016 (20)             |                                                                      |                                                              |                                                                                                                               |                                                      |
| Islam, 2016 (27)                  |                                                                      |                                                              |                                                                                                                               |                                                      |
| Sørbo, 2015 (21)                  |                                                                      |                                                              |                                                                                                                               |                                                      |
| James, 2014 (28)                  |                                                                      |                                                              |                                                                                                                               |                                                      |
| Moraes, 2011 (29)                 |                                                                      |                                                              |                                                                                                                               |                                                      |
| Shroff, 2011 (30)                 |                                                                      |                                                              |                                                                                                                               |                                                      |
| Lau, 2007 (31)                    |                                                                      |                                                              |                                                                                                                               |                                                      |
| Silverman, 2006 (32)              |                                                                      |                                                              | P + E: 0.95 (0.81-1.1)                                                                                                        | P + E: 0.86 (0.69-1.06)                              |
|                                   | P + E: 0.87 (0.76-1.01)                                              |                                                              |                                                                                                                               |                                                      |

\* IPV measured as physical (P), or emotional (E) or sexual (S)

\*\* IPV measured as physical (P), emotional/psychological/mental (M) and sexual (S) combined

<sub>A</sub> Participants were interviewed during pregnancy and again approximately 6 weeks postpartum. Results don't distinguish between violence before and after pregnancy

<sub>B</sub> Measured as BF avoidance

<sub>C</sub> Lifetime IPV interpreted as lower odds of early initiation of BF

<sub>D</sub> Measured as OR

<sub>E</sub> White women

<sub>F</sub> Black women

<sub>G</sub> Hispanic women

**Table S2.5: Early termination of exclusive breastfeeding (aOR; 95% CI) vs. no termination of exclusive breastfeeding**

| Reference                      | Exposed to IPV* prior to pregnancy                                   | Exposed to IPV* during pregnancy/post-partum                                            | Exposed to any IPV** prior to pregnancy                                                                                                                                                                                                                                                                               | Exposed to any IPV** during pregnancy/post-partum                                    |
|--------------------------------|----------------------------------------------------------------------|-----------------------------------------------------------------------------------------|-----------------------------------------------------------------------------------------------------------------------------------------------------------------------------------------------------------------------------------------------------------------------------------------------------------------------|--------------------------------------------------------------------------------------|
| Madsen, 2019 (35)              | P: 1.53 (1.01-23.1)<br>E: 1.61 (1.26-2.07)<br>S: 1.5 (1.07-2.09)     | P: 1.68 (1-2.82)<br>E: 1.23 (0.91-1.65)<br>S: 1.35 (0.96-1.91)                          | P + E + S: 1.93 (1.11-3.34)                                                                                                                                                                                                                                                                                           | P + E + S: 2.87 (1.27-6.46)                                                          |
| Martin-de-las-Heras, 2018 (36) |                                                                      |                                                                                         |                                                                                                                                                                                                                                                                                                                       |                                                                                      |
| Miller-Graff, 2018 (18)        |                                                                      |                                                                                         | P + E + S: 0.41 <sub>A</sub> (0.11-1.45)                                                                                                                                                                                                                                                                              |                                                                                      |
| Tiwari, 2018 (22)              |                                                                      |                                                                                         |                                                                                                                                                                                                                                                                                                                       |                                                                                      |
| Wallenborn, 2018 (23)          |                                                                      |                                                                                         |                                                                                                                                                                                                                                                                                                                       |                                                                                      |
| Boyce, 2017 (24)               | P: 0.83 (0.71-0.96) <sub>B</sub><br>S: 0.74 (0.49-1.12) <sub>B</sub> |                                                                                         | P + S: 0.92 (0.75-1.15) <sub>B</sub>                                                                                                                                                                                                                                                                                  |                                                                                      |
| Finnbogadottir, 2017 (25)      |                                                                      |                                                                                         | P + E + S: 5.7515 (0.229-144.4791) <sub>N,T</sub><br>P + E + S: 1.7305 (0.4944-6.0564) <sub>O,T</sub><br>P + E + S: 0.7756 (0.2616-2.9999) <sub>P,T</sub><br>P + E + S: 0.5204 (0.2158-1.2548) <sub>Q,T</sub><br>P + E + S: 0.5442 (0.2224-1.3319) <sub>R,T</sub><br>P + E + S: 0.5792 (0.1655-2.0271) <sub>S,T</sub> |                                                                                      |
| Holland, 2017 (26)             |                                                                      |                                                                                         | P + E + S: 1.73 (0.97-3.11) <sub>I,K</sub><br>P + E + S: 1.65 (0.95-2.86) <sub>I,K</sub><br>P + E + S: 0.95 (0.63-1.43) <sub>I,L</sub><br>P + E + S: 0.97 (0.67-1.39) <sub>I,L</sub><br>P + E + S: 0.71 (0.41-1.19) <sub>I,M</sub><br>P + E + S: 0.83 (0.50-1.35) <sub>I,M</sub>                                      |                                                                                      |
| Hasselmann, 2016 (20)          |                                                                      |                                                                                         |                                                                                                                                                                                                                                                                                                                       | P + E + S: 1.35 (1.07-1.71) <sub>G</sub><br>P + E + S: 1.56 (1.16-1.95) <sub>H</sub> |
| Islam, 2016 (27)               |                                                                      | P: 0.17 (0.07-0.4) <sub>C</sub><br>E: 0.51 (0.26-1) <sub>D</sub><br>S: 0.43 (0.18-1.06) |                                                                                                                                                                                                                                                                                                                       |                                                                                      |
| Sørbo, 2015 (21)               |                                                                      |                                                                                         |                                                                                                                                                                                                                                                                                                                       |                                                                                      |
| James, 2014 (28)               |                                                                      |                                                                                         |                                                                                                                                                                                                                                                                                                                       |                                                                                      |
| Moraes, 2011 (29)              |                                                                      | P: 1.17 (0.89-1.53) <sub>E</sub>                                                        |                                                                                                                                                                                                                                                                                                                       |                                                                                      |
| Shroff, 2011 (30)              | P: 0.69 (0.42-1.11)                                                  |                                                                                         |                                                                                                                                                                                                                                                                                                                       |                                                                                      |
| Lau, 2007 (31)                 |                                                                      |                                                                                         |                                                                                                                                                                                                                                                                                                                       | P + E + S: 1.839 (1.61-2.911) <sub>F</sub>                                           |
| Silverman, 2006 (32)           |                                                                      |                                                                                         |                                                                                                                                                                                                                                                                                                                       |                                                                                      |

\* IPV measured as physical (P), or emotional (E) or sexual (S)

\*\* IPV measured as physical (P), emotional/psychological/mental (M) and sexual (S) combined

A Measured as crude OR and interpreted as lower likelihood of EBF

B Lifetime IPV and interpreted as lower odds of EBF

C Interpreted as 83 % greater risk of discontinuing EBF

D Interpreted as 49 % less likely to exclusively breastfeed

E Measured as HR and interpreted as probability of early cessation of EBF

F Measured as experience of 'no IPV' and interpreted as more likely to breastfeed

G IPV until 3<sup>rd</sup> month postpartum measured as RR

H IPV in the 3<sup>rd</sup> month postpartum measured as RR

I EBF at 4 weeks postpartum

J EBF at 14 weeks postpartum

K White women

L Black women

M Hispanic women

1  
2  
3  
4 N EBF at 1 month  
5 o EBF at 2 months  
6 P EBF at 4 months  
7 Q EBF at 6 months  
8 R EBF at 9 months  
9 S EBF at 12 months  
10 T OR measured at: [https://www.medcalc.org/calc/odds\\_ratio.php](https://www.medcalc.org/calc/odds_ratio.php)  
11  
12  
13  
14  
15  
16  
17  
18  
19  
20  
21  
22  
23  
24  
25  
26  
27  
28  
29  
30  
31  
32  
33  
34  
35  
36  
37  
38  
39  
40  
41  
42  
43  
44  
45  
46  
47  
48  
49  
50  
51  
52  
53  
54  
55  
56  
57  
58  
59  
60

For peer review only

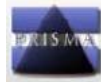

# PRISMA 2009 Checklist

| Section/topic                      | #  | Checklist item                                                                                                                                                                                                                                                                                              | Reported on page # |
|------------------------------------|----|-------------------------------------------------------------------------------------------------------------------------------------------------------------------------------------------------------------------------------------------------------------------------------------------------------------|--------------------|
| <b>TITLE</b>                       |    |                                                                                                                                                                                                                                                                                                             |                    |
| Title                              | 1  | Identify the report as a systematic review, meta-analysis, or both.                                                                                                                                                                                                                                         | 1                  |
| <b>ABSTRACT</b>                    |    |                                                                                                                                                                                                                                                                                                             |                    |
| Structured summary                 | 2  | Provide a structured summary including, as applicable: background; objectives; data sources; study eligibility criteria, participants, and interventions; study appraisal and synthesis methods; results; limitations; conclusions and implications of key findings; systematic review registration number. | 2                  |
| <b>INTRODUCTION</b>                |    |                                                                                                                                                                                                                                                                                                             |                    |
| Rationale                          | 3  | Describe the rationale for the review in the context of what is already known.                                                                                                                                                                                                                              | 2-3                |
| Objectives                         | 4  | Provide an explicit statement of questions being addressed with reference to participants, interventions, comparisons, outcomes, and study design (PICOS).                                                                                                                                                  | 2-3                |
| <b>METHODS</b>                     |    |                                                                                                                                                                                                                                                                                                             |                    |
| Protocol and registration          | 5  | Indicate if a review protocol exists, if and where it can be accessed (e.g., Web address), and, if available, provide registration information including registration number.                                                                                                                               | 3                  |
| Eligibility criteria               | 6  | Specify study characteristics (e.g., PICOS, length of follow-up) and report characteristics (e.g., years considered, language, publication status) used as criteria for eligibility, giving rationale.                                                                                                      | 3                  |
| Information sources                | 7  | Describe all information sources (e.g., databases with dates of coverage, contact with study authors to identify additional studies) in the search and date last searched.                                                                                                                                  | 3                  |
| Search                             | 8  | Present full electronic search strategy for at least one database, including any limits used, such that it could be repeated.                                                                                                                                                                               | 3 + appendix       |
| Study selection                    | 9  | State the process for selecting studies (i.e., screening, eligibility, included in systematic review, and, if applicable, included in the meta-analysis).                                                                                                                                                   | 3-4                |
| Data collection process            | 10 | Describe method of data extraction from reports (e.g., piloted forms, independently, in duplicate) and any processes for obtaining and confirming data from investigators.                                                                                                                                  | NA                 |
| Data items                         | 11 | List and define all variables for which data were sought (e.g., PICOS, funding sources) and any assumptions and simplifications made.                                                                                                                                                                       | NA                 |
| Risk of bias in individual studies | 12 | Describe methods used for assessing risk of bias of individual studies (including specification of whether this was done at the study or outcome level), and how this information is to be used in any data synthesis.                                                                                      | 4                  |
| Summary measures                   | 13 | State the principal summary measures (e.g., risk ratio, difference in means).                                                                                                                                                                                                                               | NA                 |
| Synthesis of results               | 14 | Describe the methods of handling data and combining results of studies, if done, including measures of consistency (e.g., I <sup>2</sup> ) for each meta-analysis.                                                                                                                                          | NA                 |

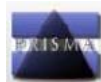

# PRISMA 2009 Checklist

Page 1 of 2

| Section/topic                 | #  | Checklist item                                                                                                                                                                                           | Reported on page # |
|-------------------------------|----|----------------------------------------------------------------------------------------------------------------------------------------------------------------------------------------------------------|--------------------|
| Risk of bias across studies   | 15 | Specify any assessment of risk of bias that may affect the cumulative evidence (e.g., publication bias, selective reporting within studies).                                                             | 4                  |
| Additional analyses           | 16 | Describe methods of additional analyses (e.g., sensitivity or subgroup analyses, meta-regression), if done, indicating which were pre-specified.                                                         | NA                 |
| <b>RESULTS</b>                |    |                                                                                                                                                                                                          |                    |
| Study selection               | 17 | Give numbers of studies screened, assessed for eligibility, and included in the review, with reasons for exclusions at each stage, ideally with a flow diagram.                                          | 5                  |
| Study characteristics         | 18 | For each study, present characteristics for which data were extracted (e.g., study size, PICOS, follow-up period) and provide the citations.                                                             | 5                  |
| Risk of bias within studies   | 19 | Present data on risk of bias of each study and, if available, any outcome level assessment (see item 12).                                                                                                | 5                  |
| Results of individual studies | 20 | For all outcomes considered (benefits or harms), present, for each study: (a) simple summary data for each intervention group (b) effect estimates and confidence intervals, ideally with a forest plot. | 6                  |
| Synthesis of results          | 21 | Present results of each meta-analysis done, including confidence intervals and measures of consistency.                                                                                                  | NA                 |
| Risk of bias across studies   | 22 | Present results of any assessment of risk of bias across studies (see Item 15).                                                                                                                          | NA                 |
| Additional analysis           | 23 | Give results of additional analyses, if done (e.g., sensitivity or subgroup analyses, meta-regression [see Item 16]).                                                                                    | NA                 |
| <b>DISCUSSION</b>             |    |                                                                                                                                                                                                          |                    |
| Summary of evidence           | 24 | Summarize the main findings including the strength of evidence for each main outcome; consider their relevance to key groups (e.g., healthcare providers, users, and policy makers).                     | 6                  |
| Limitations                   | 25 | Discuss limitations at study and outcome level (e.g., risk of bias), and at review-level (e.g., incomplete retrieval of identified research, reporting bias).                                            | 6-7                |
| Conclusions                   | 26 | Provide a general interpretation of the results in the context of other evidence, and implications for future research.                                                                                  | 8                  |
| <b>FUNDING</b>                |    |                                                                                                                                                                                                          |                    |
| Funding                       | 27 | Describe sources of funding for the systematic review and other support (e.g., supply of data); role of funders for the systematic review.                                                               | 8                  |

From: Moher D, Liberati A, Tetzlaff J, Altman DG, The PRISMA Group (2009). Preferred Reporting Items for Systematic Reviews and Meta-Analyses: The PRISMA Statement. PLoS Med 6(7): e1000097. doi:10.1371/journal.pmed1000097

For more information, visit: [www.prisma-statement.org](http://www.prisma-statement.org).

Page 2 of 2

For peer review only - <http://bmjopen.bmj.com/site/about/guidelines.xhtml>

# BMJ Open

## Intimate Partner Violence and Breastfeeding: A Systematic Review

|                                 |                                                                                                                                                                                                                                                                                                                                                                                                                                                                                                                                                                                                                                                                   |
|---------------------------------|-------------------------------------------------------------------------------------------------------------------------------------------------------------------------------------------------------------------------------------------------------------------------------------------------------------------------------------------------------------------------------------------------------------------------------------------------------------------------------------------------------------------------------------------------------------------------------------------------------------------------------------------------------------------|
| Journal:                        | <i>BMJ Open</i>                                                                                                                                                                                                                                                                                                                                                                                                                                                                                                                                                                                                                                                   |
| Manuscript ID                   | bmjopen-2019-034153.R2                                                                                                                                                                                                                                                                                                                                                                                                                                                                                                                                                                                                                                            |
| Article Type:                   | Original research                                                                                                                                                                                                                                                                                                                                                                                                                                                                                                                                                                                                                                                 |
| Date Submitted by the Author:   | 11-Aug-2020                                                                                                                                                                                                                                                                                                                                                                                                                                                                                                                                                                                                                                                       |
| Complete List of Authors:       | Normann, Anne Katrine; University of Southern Denmark Department of Clinical Research<br>Bakiewicz, Aleksandra; University of Southern Denmark Department of Clinical Research<br>Kjerulff Madsen , Frederikke ; University of Southern Denmark Department of Clinical Research<br>Khan , Khalid; Department of Preventive Medicine and Public Health, Faculty of Medicine, University of Granada<br>Rasch, Vibeke; Odense Universitetshospital, Obstetrics and Gynaecology; Syddansk Universitet, Institute of Clinical Research<br>Linde, Ditte ; Odense Universitetshospital, Obstetrics and Gynaecology; Syddansk Universitet, Institute of Clinical Research |
| <b>Primary Subject Heading</b>: | Obstetrics and gynaecology                                                                                                                                                                                                                                                                                                                                                                                                                                                                                                                                                                                                                                        |
| Secondary Subject Heading:      | Public health                                                                                                                                                                                                                                                                                                                                                                                                                                                                                                                                                                                                                                                     |
| Keywords:                       | OBSTETRICS, PUBLIC HEALTH, Maternal medicine < OBSTETRICS, Reproductive medicine < GYNAECOLOGY                                                                                                                                                                                                                                                                                                                                                                                                                                                                                                                                                                    |
|                                 |                                                                                                                                                                                                                                                                                                                                                                                                                                                                                                                                                                                                                                                                   |

SCHOLARONE™  
Manuscripts



I, the Submitting Author has the right to grant and does grant on behalf of all authors of the Work (as defined in the below author licence), an exclusive licence and/or a non-exclusive licence for contributions from authors who are: i) UK Crown employees; ii) where BMJ has agreed a CC-BY licence shall apply, and/or iii) in accordance with the terms applicable for US Federal Government officers or employees acting as part of their official duties; on a worldwide, perpetual, irrevocable, royalty-free basis to BMJ Publishing Group Ltd ("BMJ") its licensees and where the relevant Journal is co-owned by BMJ to the co-owners of the Journal, to publish the Work in this journal and any other BMJ products and to exploit all rights, as set out in our [licence](#).

The Submitting Author accepts and understands that any supply made under these terms is made by BMJ to the Submitting Author unless you are acting as an employee on behalf of your employer or a postgraduate student of an affiliated institution which is paying any applicable article publishing charge ("APC") for Open Access articles. Where the Submitting Author wishes to make the Work available on an Open Access basis (and intends to pay the relevant APC), the terms of reuse of such Open Access shall be governed by a Creative Commons licence – details of these licences and which [Creative Commons](#) licence will apply to this Work are set out in our licence referred to above.

Other than as permitted in any relevant BMJ Author's Self Archiving Policies, I confirm this Work has not been accepted for publication elsewhere, is not being considered for publication elsewhere and does not duplicate material already published. I confirm all authors consent to publication of this Work and authorise the granting of this licence.

## Intimate Partner Violence and Breastfeeding: A Systematic Review

A K Normann<sup>a</sup>, A Bakiewicz<sup>a,b</sup>, F K Madsen<sup>a</sup>, K S Khan<sup>c</sup>, V Rasch<sup>a,b</sup>, D S Linde<sup>a,b,d</sup>

<sup>a</sup>Department of Clinical Research, University of Southern Denmark, Odense, Denmark

<sup>b</sup>Department of Obstetrics and Gynecology, Odense University Hospital, Odense, Denmark

<sup>c</sup>Department of Preventive Medicine and Public Health, Faculty of Medicine, University of Granada

<sup>d</sup>OPEN, Odense Patient Data Explorative Network, Odense University Hospital, Odense, Denmark

*Corresponding author:* Anne Katrine Normann Nielsen, Department of Clinical Research, University of Southern Denmark, 5000 Odense C, Denmark, Ph.: +45 28 74 68 20; e-mail: [annekatrinenn@gmail.com](mailto:annekatrinenn@gmail.com)



## 51 Abstract

52 **Objective:** The association between intimate partner violence (IPV) and breastfeeding is unclear. We conducted  
53 a systematic review to summarise the evidence of breastfeeding outcomes following exposure to IPV.

54  
55 **Design:** Systematic review.

56  
57 **Methods:** We searched for published studies without study design or language restrictions (up to July 2019) in  
58 the following databases: PubMed, Embase, SCOPUS and The Global Health Library. Studies assessing various  
59 breastfeeding outcomes (initiation, duration and exclusive breastfeeding) in women exposed to IPV in any form  
60 (physical, psychological or sexual) and at any stage (one-year pre-, during, or post pregnancy) were included.  
61 Two authors independently selected the studies and conducted the quality appraisal by use of the Newcastle-  
62 Ottawa Scale. Results were summarised taking precision and quality into account.

63  
64 **Results:** A total of 16 studies (participants n= 414,393) were included and they adjusted for a total of 48 different  
65 confounders. The majority of studies were cross-sectional (n= 11) and most studies were judged to be fair/low  
66 quality. Four out of seven studies found that IPV exposure shortened breastfeeding duration (aORs= 0,22 (95 %  
67 CI: 0,05-0,85), 1,18 (95 % CI: 1,01-1,37), 5,92 (95 % CI: 1,72-27,98), 1,28 (95 % CI: 1,18-1,39)) Further, 5/10  
68 studies found that IPV led to early termination of exclusive breastfeeding (aORs= 1,53 (95 % CI: 1,01-23,1), 0,83  
69 (95 % CI: 0,71-0,96), 1,35 (95 % CI:1,07-1,71), 0,17 (95 % CI: 0,07-0,4), 1,839 (95 % CI: 1,61-2,911)) and 2/6  
70 studies found that IPV significantly reduced breastfeeding initiation (aOR= 2,00 (95% CI: 1,2-3,3), 0,81 (95%  
71 CI: 0,7-0,93)).

72  
73 **Conclusion:** IPV exposure appears to associate negatively with some breastfeeding outcomes. Individual patient  
74 data meta-analysis is required to quantify the magnitude of the association for specific IPV-outcome  
75 combinations. More high-quality studies and definition of core confounders are warranted.

76  
77 **PROSPERO registration number:** CRD42019129353 (prospectively registered)

78  
79 **Keywords:** Intimate partner violence, domestic violence, breastfeeding, breastfeeding practices, exclusive  
80 breastfeeding, breastfeeding initiation.

### 81 82 **Strengths and limitations of this study:**

- 83 • This systematic review provides the latest evidence of the association between IPV and breastfeeding.
- 84 • Our review excluded studies with women who had a lifetime history of violence and childhood abuse.
- 85 • We conducted an appropriate quality assessment of studies by use of the Newcastle-Ottawa Scale.
- 86 • The heterogenous field of confounders in the included studies was grouped by making key domains.
- 87 • It was not possible to make a causal association nor conduct a meta-analysis.

88

89

## 90 Introduction

1  
2  
3  
4 91 Intimate partner violence (IPV) is defined as any behavior by a current or former intimate partner that causes physical,  
5 92 psychological or sexual harm to those within an intimate relationship (1, 2). Most often, IPV is perpetrated by men  
6 93 against women (1-3), and the World Health Organization (WHO) estimates that one in three women will be exposed  
7 94 to either physical/or sexual violence during their lifetime (2). IPV can have both immediate and long-term mental and  
8 95 physical health consequences for the victims, including depression and physical impairment (3-5). Further, it has been  
9 96 found that IPV is related to a number of reproductive health outcomes, including preterm birth, low birth weight,  
10 97 insufficient weight gain, miscarriage, induced abortion and difficulties or lack of attachment to the baby (3-6). It has  
11 98 been speculated that IPV may also influence the establishment of breastfeeding practices, however this association is  
12 99 complex. WHO recommends initiating breastfeeding within one hour of birth, exclusive breastfeeding for six months  
13 100 and that mothers should continue breastfeeding for up to two years or beyond together with complementary feeding  
14 101 (7). IPV may affect breastfeeding directly, e.g. through sore nipples and difficulty in relaxing enough for adequate let  
15 102 down, but also indirectly, e.g. through lack of support or depression, self-doubt, body negativity, and anxiety (8, 9)  
16 103 Furthermore, qualitative studies have found that women who have experienced violence in their childhood may have  
17 104 trouble continuing exclusive breast feeding due to difficulties in separating the sexual role from the maternal role of  
18 105 breasts or due to lack of situational control (10, 11). The existing literature is characterised by various outcome  
19 106 measures for both IPV and breastfeeding, and further there are no agreement of core factors that may confound the  
20 107 association between IPV and breastfeeding, hence, there is variation in the statistical models used for analysing the  
21 108 relationship. This may be the reasons why studies on the relationship of IPV and breastfeeding practise have had  
22 109 inconsistent results. A study of IPV and breastfeeding practices across Africa found that IPV was associated with  
23 110 lower adjusted odds for breastfeeding initiation and exclusive breastfeeding in some African countries and higher  
24 111 adjusted odds in other countries (12), whilst a recent systematic review concluded that the majority of studies (n= 12,  
25 112 participant= 133,861) found a negative association between breastfeeding initiation and exclusive breastfeeding for  
26 113 the first six months (13). Yet, the review did not involve an appropriate quality assessment and had no detailed  
27 114 discussion of confounders. Further, new literature has been published. Therefore, we conducted a robust systematic  
28 115 review thoroughly investigating the association of exposure to IPV pre, during and post pregnancy with breastfeeding  
29 116 outcomes sand synthesised the evidence taking confounders, precision and quality into considerations.  
30  
31  
32  
33  
34  
35  
36  
37  
38  
39  
40  
41  
42

## 43 118 **Methods**

44 119 This systematic review was conducted according to the Preferred Reporting Items for Systematic Reviews and  
45 120 Meta-Analyses (PRISMA) (14) and Meta-analyses Of Observational Studies in Epidemiology (MOOSE) (15)  
46 121 guidelines. The protocol was prospectively registered in The International Prospective Register of Systematic  
47 122 Reviews (PROSPERO, ID: CRD42019129353)  
48  
49

### 50 123 *Eligibility criteria and search methods identification of studies*

51 124 We searched PubMed, Embase, SCOPUS and the Global Health Library from the (8-12 March 2019) with no time or  
52 125 language restrictions. An updated search was conducted the 18<sup>th</sup> of July 2019. Search terms included “intimate partner  
53 126 violence” OR “spouse abuse” OR “domestic violence” OR “physical abuse” OR “sex offenses” OR “battered women”  
54 127 AND “breast feeding” OR “breastmilk expression” OR “feeding behavior” OR “milk, human” OR lactation OR “milk  
55 128 ejection” (full search in Appendix, S1).  
56  
57  
58  
59  
60

1  
2  
3  
4 130 A PICO-model was made to develop the search strategy and selection of the literature (16). We included studies with  
5  
6 131 women exposed to violence one year prior to pregnancy, during pregnancy, and in the postpartum period which met  
7 132 the following criteria; (a) men as perpetrators of violence against women, (b) women in an intimate relationship over  
8  
9 133 one month during previous pregnancies, current pregnancy and postpartum, (c) women who breast fed from the first  
10 134 hour and until 6 months after giving birth, (d) women exposed to IPV but also perpetrators of violence against men,  
11 135 (e) women exposed to other forms of violence (e.g. gang violence bulliying). We excluded (a) women in intimate  
12 136 relationships of less than one month of duration (during previous pregnancies, current pregnancy or postpartum), (b)  
13 137 women who gave birth to twins or triplets, (c) women with absolute counter indication for breast feeding, (d) women  
14 138 who were not able to breastfeed (e.g. due to mastectomy), (e) women with eating disorders or chronic illness (e.g.  
15 139 HIV), (f) women with substance abuse (e.g. alcohol, drugs), (g) studies with only sexual minorities (e.g. bisexual,  
16 140 homosexuals).

20 141 IPV was defined as the following: Physical violence (i.e slapping, hitting, kicking, beating), sexual violence (including  
21 142 forced sexual intercourse or other forms of sexual coercion), psychological violence (humiliation, insults,  
22 143 intimidation, threats of harm), economic violence (i.e restricting access to financial resources, education, employment  
23 144 and medical care) and controlling behaviours (i.e isolating a person from friends and family, controlling their  
24 145 movements, restricting access to education and employment).

27 146 Outcome was breastfeeding practices in according with WHO's recommendations defined as; (a) intention to  
28 147 breastfeed (when the woman showed interest in offering breast milk), (b) start of breastfeeding/duration (when the  
29 148 woman offered the child breast milk in the postpartum period), (c) exclusive breastfeeding of children from first day  
30 149 of life and up to 6 months (exclusive breastfeeding defined as the infant only receiving breast milk without any  
31 150 additional food or drink, not even water), (d) duration of exclusive breastfeeding. Eligible studies for inclusion were  
32 151 original publications of observational studies.

37 153 After removing duplicates, two authors independently screened titles, abstract and full-text (AKN and AB) using  
38 154 Covidence ([www.covidence.org](http://www.covidence.org)) (17). Disagreements were solved through discussion. One author (AKN) extracted  
39 155 data from included studies into a standardised Excel template. Extracted data included: Title, first author, publication  
40 156 year, country, study characteristics, study objective, participant characteristics, sample size, inclusion/exclusion  
41 157 criteria, type of exposure, measurement tool of exposure, primary outcomes and confounders that were adjusted for  
42 158 in the statistical analysis. Outcome data were verified by a second author (FKM).

#### 47 160 *Study quality assessment and data synthesis*

49 161 The Newcastle Ottawa Scale (NOS) was used to assess the quality of cohort studies and a modified version of the  
50 162 scale was used for cross-sectional studies. The scale addresses the following domains: Selection process,  
51 163 comparability, exposure and outcome of interest. A maximum of nine stars can be given if all domains are well  
52 164 described in a given study. Cohort studies are regarded to be of 'good quality' if rewarded 3 or 4 stars in the selection  
53 165 domain, 1 or 2 stars in the comparability domain, and 2 or 3 stars in the outcome/exposure domain. Studies are  
54 166 regarded as being of 'fair quality' if rewarded 2 stars in the selection domain, 1 or 2 stars in the comparability domain,  
55 167 and 2 or 3 stars in the outcome/exposure domain. Finally, studies are judged as being of 'poor quality' if rewarded 0  
56 168 or 1 star in the selection domain or 0 stars in the comparability domain or 0 or 1 stars in the outcome/exposure domain.

1  
2  
3  
4 169 For the cross-sectional version of the scale, the domain that assessed confounders was modified and no stars were  
5 given if studies did not justify their choice of confounders in their statistical analysis. A total of 10 stars can be given  
6 170 to the cross-sectional studies, and they are regarded as 'very good' if rewarded 9-10 points, 'good' if rewarded 7-8  
7 171 points, 'satisfactory' if rewarded 5-6 points and 'unsatisfactory' if rewarded 0-4 points. Further, we modified both  
8 172 scales and added a point system for confounders, so that each study was given one point or star for each confounder  
9 173 they adjusted for (Table S2.1) Two authors (AKN and FMK) conducted the quality assessment independently and  
10 compared results. Disagreement were solved through discussion. AKN and DSL conducted the quality assessment of  
11 174 Madsen et al., as FKM was co-author of this study and therefore considered ineligible.  
12  
13 175  
14 176  
15  
16 177

17 178 Two authors (AKN and DSL) made key domains for confounding factors and grouped them (Table S2.2). Results for  
18 the various IPV outcomes combinations were summarised and physical violence was presented in a forest plot. Studies  
19 179 that investigated physical violence were presented to emphasize the most reported form of IPV (3). Inferences were  
20 180 generated taking study precision and quality into account as meta-analysis was not possible. The substantial  
21 181 heterogeneity of exposure, outcome, study quality and statistical models in the adjusted odds ratios (aOR) reported in  
22 182 individual studies was the reason we settled for a qualitative synthesis in the form of vote-counting, which we  
23 183 conducted within broad exposure-outcome subgroups stratified by study quality and precision to minimise bias. To  
24 184 determine whether a study showed a negative association or no difference we relied on numerical data in vote-counting  
25 185 to avoid subjectivity. This approach is in line with what is considered suitable given study variability in previous  
26 186 review publications (18, 19).  
27  
28  
29  
30 187  
31  
32 188

#### 33 189 **Patient and Public Involvement:**

34 190 No patients involved.  
35  
36 191

#### 37 192 **Results**

38 The database searches resulted in 2062 records and 1634 records were eligible for title and abstract screening after  
39 193 removal of duplicates (Fig. 1). A total of 16 studies met the inclusion criteria of which 11 were cross-sectional (20-  
40 194 31) and five were cohort studies (32-35). The studies were published between 2006 and 2019. Four studies was  
41 195 conducted in The United States (20, 22, 25, 31), four in India (21, 23, 26, 29), two in Brazil (28, 34), one in Tanzania  
42 196 (32), one in Spain (33), one in Sweden (24), , one in Norway (35), one in Australia (27) and one in Hong Kong (30).  
43 197 Population age ranged from 14 years to 49 year and was reported as means (n= 3) or in intervals (n= 13). The size of  
44 198 the study population varied from 69 to 195,264 participants with a mean sample size of 25,899 (Table 1). Exposure  
45 199 (IPV) was measured through questionnaires (22, 23, 25, 26, 29, 31, 32) or through various validated tools: The  
46 200 Conflict-Tactic Scale (CTS) (20, 21, 28, 30, 34), The Abuse Assessment Screen (AAS) (30), the Index of Spouse  
47 201 Abuse (ISA) (33), the Composite Abuse Scale (CAS) (27), and the Norvold Abuse Questionnaire (24) (Table 1)  
48  
49 202  
50  
51  
52 203

53 204 In regards to exposure, two of the studies only focused on physical violence (22, 28) and one study only focused on  
54 205 psychological violence (21). However, the majority of studies measured IPV as 'any IPV' and did not separate  
55 206 violence into groups (20, 22, 24, 27, 29-31, 34), and five studies measured both physical, or/and psychological or/and  
56 207 sexual violence respectively and combined to compare the differences in exposure of a certain type of IPV (23, 26,  
57  
58  
59  
60

1  
2  
3  
4 208 32, 33, 35). The outcome, breastfeeding was measured as early cessation/shortened duration of breastfeeding,  
5 209 initiation of breastfeeding, or exclusive breastfeeding. The definition of "shortened duration of breastfeeding" differed  
6 210 as each study sat their own time limit (Table S2.3). Some studies investigated more than one outcome and therefore,  
7 211 one study could be presented in more than one outcome table.  
8  
9 212

10 212  
11 213 Overall, the included studies adjusted for 48 different confounders within the following domains: maternal  
12 214 sociodemographic, relationship characteristics, maternal lifestyle and health, economy, pregnancy and postpartum  
13 215 related problems, child characteristics, support during pregnancy and postpartum, violence or stressful life events,  
14 216 pregnancy intention, caste and religion. The most common confounding factors were maternal lifestyle and health,  
15 217 maternal sociodemographics, and relationship characteristics. The majority of studies did not justify their choice of  
16 218 confounders (21-25, 27, 29-31, 34). Sorbo et al. and Madsen et. al. used the directed acyclic graph (DAG) to justify  
17 219 the confounders adjusted for in their analysis, and Sorbo et. al. also made a sensitivity analysis to determine whether  
18 220 or not the association between IPV and breastfeeding practices was mediated primarily through postpartum  
19 221 depression. They found that depression could not explain early cessation of breastfeeding (35).  
20 222  
21 222  
22 222  
23 222  
24 222  
25 222

#### 26 223 *Study quality assessment*

27 224 Of the five cohort studies, one study was judged as 'good quality' (32), three studies was judged as 'fair quality' (20,  
28 225 33, 35) and one study was judged as 'poor quality' (34). Of the 11 cross-sectional studies, six were judged as having  
29 226 'good' quality (21-23, 26, 28, 30), one was judged as 'satisfactory' (31) and three studies were judged as  
30 227 'unsatisfactory' (25, 27, 29). One cross-sectional study was not assessed using NOS for cross-sectional studies, since  
31 228 the study was embedded from a cohort (24), hence, NOS for cohort studies was used to assess the quality and it was  
32 229 judged as of 'poor quality' (24) (Fig. 2).  
33 230  
34 230  
35 230  
36 230

#### 37 231 *Initiation of breastfeeding*

38 232 Six studies investigated the association between exposure to IPV and initiation of breastfeeding (20, 22, 23, 25, 31,  
39 233 33). Two studies found a statistical significant association between initiation of breastfeeding and exposure to either  
40 234 physical or sexual violence (23) ( $aOR_{\text{physical}}=0.81$ ; 95% CI 0.71-0.93.  $aOR_{\text{sexual}}=0.52$ ; 95% CI 0.36-0.76) or  
41 235 psychological violence (33) ( $aOR$  2,00; 95% CI 1.2-3.3). Four studies found no association when exposed to multiple  
42 236 types of violence (20, 23, 25, 31) (Table S2.4)  
43 237  
44 237  
45 237  
46 237

#### 47 238 *Shortened duration of breastfeeding*

48 239 Seven studies reported outcomes based on early cessation or shortened duration of breastfeeding when exposed to  
49 240 violence (20-22, 25, 27, 31, 35), and four studies found a significant association ( $aORs= 0,22$  (95 % CI: 0,05-0,85),  
50 241 1,18 (95 % CI: 1,01-1,37), 5,92 (95 % CI: 1,72-27,98), 1,28 (95 % CI: 1,18-1,39)) between exposure to IPV and early  
51 242 cessation/shortened duration of breastfeeding (20, 22, 35) (Table S2.3) Miller-graff et. al (20) found that IPV was  
52 243 associated with decreased odds ratio of for continuation of breastfeeding ( $OR=0.22$ ; 95 % CI 0.5-0.85), hence, IPV  
53 244 was associated with an increased risk of shortened duration of breastfeeding. Further, one study found a statistical  
54 245 significant association between reduced duration/early cessation and IPV ( $OR=1,41$  95% CI 1.15-1.74). However, the  
55 246 association became insignificant when adjusting for confounders ( $aOR=0.94$ ; 95% CI 0.76-1.7) (31). Three of the  
56 246  
57 246  
58 246  
59 246  
60



1  
2  
3  
4 247 studies found no association between violence and breastfeeding duration or early cessation (21, 25, 27). Three studies  
5 did not distinguish between period of exposure (27, 29, 34), whereas the remaining papers categorised time of  
6 248 exposure. One study (27) found no association between IPV and breastfeeding practices and concluded that IPV itself  
7 249 did not influence breastfeeding outcomes as much as maternal age, education and birth method (Table S2.3)  
8 250  
9 251

### 11 252 *Exclusive breastfeeding*

12  
13 253 Ten studies assessed exposure to violence in relation to risk of early termination of exclusive breastfeeding and five  
14 254 studies found a statistical association (aORs= 1,53 (95 % CI: 1,01-23,1), 0,83 (95 % CI: 0,71-0,96), 1,35 (95 %  
15 CI:1,07-1,71), 0,17 (95 % CI: 0,07-0,4), 1,839 (95 % CI: 1,61-2,911) (23, 26, 30, 32, 34) and five studies found no  
16 255 statistical association (20, 24, 25, 28, 29) (Fig. 3) (Table S2.5)  
17 256  
18  
19 257

## 20 258 **Discussion**

### 21 259 *Main findings*

22  
23 260 This systematic review summarised the most recent evidence, between exposure to IPV and breastfeeding practices.  
24 261 A total of 16 studies were included of which 11 were cross-sectional and five were cohort studies. Forty-eight different  
25 262 confounders were controlled for in the studies. Only one cohort was judged as being of good quality, hence, the overall  
26 263 quality of the studies was fair to low. The majority of studies found that exposure to IPV in any form and at any stage  
27 264 had a significant negative association with breastfeeding duration, early termination of exclusive breastfeeding, but it  
28 265 did not reduce initiation.  
29  
30  
31

### 32 266 *Strengths and limitations:*

33 267 The review synthesises the latest evidence of pregnancy-related IPV and WHO recommended breastfeeding practices  
34 268 and elucidates the complex association between IPV exposure, breastfeeding, and confounding factors. A limitation  
35 269 of this review is that the majority of included studies were cross-sectional, hence, a causal association cannot be  
36 270 estimated (36), and we were not able to conduct a meta-analysis. Therefore, there is a need for well-designed  
37 271 longitudinal studies to better estimate the association. The individual results were presented in a forest plot, without  
38 272 meta-analysis to illustrate the heterogeneity across studies. The forest plot was ordered in the vertical axis by the risk  
39 273 of bias in a manner that places higher-quality study findings above those with lower quality. This approach is in  
40 274 line with the recommendation to exploit the plot's vertical dimension should be used to illustrate differences in  
41 275 important study characteristics such as risk of bias (37). Another limitation of this review is that a similar systematic  
42 276 review was recently conducted (13). However, only seven studies were included in both reviews and the data included  
43 277 in this review tripled the evidence size compared to the previous (280,532 more participants contributed data to our  
44 278 analysis than the 133,861 participants previously) (13). Yet one should bear in mind that the participants in this review  
45 279 primarily come from two large scale studies that both used data from Pregnancy Risk Assessment Monitoring System  
46 280 (PRAMS) (21) (31) whilst only one of these studies (31) was included in the previous review. However, as there is  
47 281 no overlap in data - Silverman et. al. (31) used data from women participating in the PRAMS study between 2000-  
48 282 2003, whereas Wallenborn et. al. (22) used data from women participating from 2004-2014, we considered them as  
49 283 separate studies – we believe it to be a strength of this review that both studies are included. In comparison to the  
50 284 other recent review, another strength of this review is that we conducted an appropriate quality assessment of all  
51 285  
52  
53  
54  
55  
56  
57  
58  
59  
60

1  
2  
3  
4 286 included studies and made use of a validated tool in the form of NOS, whilst Mezzavilla et al. (13) used STROBE to  
5 287 asses quality through bias susceptibility of included studies. However, STROBE is not an accepted quality assessment  
6 288 tool as this is a reporting guideline for observational studies (38, 39), hence, the quality assessment conducted in this  
7 289 review is more meticulous. Yet, a limitation of NOS is that the quality assessors need to adapt the scale to specific  
8 290 research designs, which can lead to the possibility of low agreement between quality assessors (40, 41). Nevertheless,  
9 291 as our quality assessment was conducted by two independent reviewers, we judged this issue to be minor. Further, the  
10 292 two versions of the NOS scale do not consider that cohort studies are superior to cross-sectional studies in the evidence  
11 293 hierarchy, hence, this is a separate parameter to take into consideration when judging the overall quality of evidence  
12 294 according to NOS. Additionally, our review excluded studies with women who had a lifetime history of violence and  
13 295 childhood abuse, whereas the previous review included these populations of women. Hence, our exposure differs to  
14 296 some extent and a more heterogenous exposure that consist of both childhood abuse and pregnancy-related IPV adds  
15 297 a further complicating element to the association.  
16 298

### 23 299 **Interpretation of findings**

24 300 Overall, our study results support the findings of the recent review by Mezzavilla et. al (13) despite our review is  
25 301 mainly being based on different studies and have different exposures. In line with Mezzavilla et. al we found that the  
26 302 most investigated outcome was exclusive breastfeeding, and that studies varied in quality. In contrast to Mezzavilla  
27 303 et. al, they also reported significant results from studies investigating women exposed to lifetime history of IPV. This  
28 304 may indicate that exposure to any time of violence may affect breastfeeding patterns. However, the reason why we  
29 305 choose to exclude life time IPV is that evidence points out that the association of only experiencing violence in  
30 306 pregnancy may be overestimated as there is evidence that victimisation as a young child increases the risk of further  
31 307 victimisation later in life (42), hence, it also increases risk of breastfeeding difficulties when becoming a mother (43,  
32 308 44). Mediation models exploring childhood abuse and the negative association with breastfeeding have found it to  
33 309 stem from shame and the reaction to touch, in the postnatal period, which can lead to possible re-traumatization (10).  
34 310 With this in mind, it is interesting that only two studies in our review adjusted for childhood abuse in their statistical  
35 311 calculations with contradictory results (20, 35). Hence, as the majority of studies did not control for this factor, we  
36 312 cannot rule out that the exposure of IPV found in this study may be overestimated. Further, it is plausible that our  
37 313 exposure can be affected by recall bias. Women are primarily interviewed about exposure of IPV in relation to  
38 314 pregnancy in the postpartum period, which can potentially introduce recall bias as some women may not remember  
39 315 the extent of the violence or when they were exposed to violence. Moreover, women exposed to violence often under-  
40 316 report or refuse to participate in IPV studies in order to protect themselves or the perpetrator (45). If our effect  
41 317 estimates are affected by recall bias or underreporting, it plausible that true association is underestimated. Further,  
42 318 exclusive breastfeeding is often referred to as the most favourable type of feeding of infants. These recommendations  
43 319 may influence the women's reports on exclusive breastfeeding as is it can be strongly correlated to the feeling of being  
44 320 a "good" mother. If women systematically erroneously report to exclusively breastfeed their babies to a higher extent  
45 321 than what to be the case, it is a type of reporting bias, which may also underestimate the true association between IPV  
46 322 and breastfeeding.  
47 323  
48  
49  
50  
51  
52  
53  
54  
55  
56  
57  
58  
59  
60

1  
2  
3  
4 324 In relation to confounders it is worth noticing that our synthesis elucidated the comprehensive number of confounders  
5 325 that are adjusted for in the IPV-breastfeeding relationship. A key finding of this review is that most studies did not  
6 326 state their reasons for choice of confounders and there seems to be lack of consensus in the identification of potential  
7 327 confounders. Some covariates may be part of the causal pathway of the association between violence and  
8 328 breastfeeding, hence they are not true confounders. For instance, depression is one variable that can both be identified  
9 329 as a confounder, or an intermediate variable in the causal pathway. Sorbo et. al (35) concluded, that depression could  
10 330 not explain early cessation of breastfeeding, whilst other studies (46, 47), found that depression had a negative impact  
11 331 on breastfeeding duration in women suffering from depression. The mechanism between breastfeeding and depression  
12 332 is poorly understood, but research of failed lactation and perinatal depression theorise that it may be the manifestation  
13 333 of neuroendocrine perturbations in gonadal and lactogenic hormones (48). The lack of consensus in identification of  
14 334 potential confounders and their influence on the association between IPV and breastfeeding is also illustrated in two  
15 335 large scale studies by Wallenborn et. al. (22) and Silverman et. al. (31). Hence, Wallenborn et. al. (22) adjusted for  
16 336 marital status, education and insurance status, whilst Silverman et. al. (31) adjusted for race, age, marital status,  
17 337 education and smoking. Their data were from the same surveillance project (PRAMS), but interestingly, Silvermann  
18 338 et. al. (31) did not find any significant association when controlling for confounders, opposite Wallenborn et. al. (22),  
19 339 who found a significant association, but also found that stress and smoking affected breastfeeding when controlling  
20 340 for IPV, which provides evidence that stress and smoking are mediators and should not be treated as confounders.  
21 341

22 342 Overall, the inconsistency of potential confounders propose a need for defining core outcome measures related to IPV  
23 343 and breastfeeding practices (49). We suggest an individual patient data meta-analysis (50), by sharing raw data from  
24 344 existing studies and a powerful reanalysis adjusting for predefined confounders, can make evidence synthesis more  
25 345 robust in this area.  
26 346

### 27 347 **Conclusion**

28 348 This review shows that the association between IPV and breastfeeding is complex and that the effect of exposure to  
29 349 IPV on breastfeeding practices was difficult to properly asses based on data synthesis without the possibility of meta-  
30 350 analysis. The majority of studies in this review indicated that IPV exposure in pregnancy was associated with impaired  
31 351 breastfeeding, yet still some studies also found no association. There is no consensus of which confounders influence  
32 352 the relationship, hence, future research should aim to define core outcome measures and include longitudinal studies  
33 353 of high quality with pre-defined confounders.  
34 354

### 35 355 **Funding**

36 356 All authors were financed through their institutions: Department of Clinical Research, University of Southern  
37 357 Denmark (SDU), and Odense University Hospital (OUH). Professor Khalid S. Khan is distinguished investigator at  
38 358 the University of Granada through a Beatriz Galindo (Senior Modality) Program grant of the Spanish Ministry of  
39 359 Science, Innovation and Universities. The funders had no role in developing the article.  
40 360

### 41 361 **Competing interests**



DSL, AKN, AB, and KSK had no conflict of interest. VR and FMK are co-authors of one study included in this review.

### Acknowledgements

Research librarians, Lasse Østengaard and Peter Everfelt, for assistance in literature search. Professor Stella Martin-de-Las-Heras for providing an advanced copy of her paper for inclusion in our review.

### Author statement

AKN and AB made the protocol and screened for eligible articles. AKN planned the data extraction, which was cross-checked and verified by FKM. AKN, FKM and DSL did quality assessment. Disagreement was solved through discussion.

AKN designed to tables and wrote the first draft of the manuscript, which was reviewed by DSL, VR, KSK and AB. All authors approved the final manuscript.

### Data sharing statement

No additional data available.

**Table 1: Characteristics of studies included in the review of the intimate partner violence and breastfeeding outcomes**

| Reference                      | Study design    | Country           | Setting                                             | Sample size | Age         | Tool to measure IPV                      | Outcome measures                         | Quality |
|--------------------------------|-----------------|-------------------|-----------------------------------------------------|-------------|-------------|------------------------------------------|------------------------------------------|---------|
| Madsen, 2019 (32)              | Cohort          | Tanzania          | Hospital                                            | 1128        | 20-30       | Interview (from WHO multi-country study) | Premature termination of exclusive BF    | Good    |
| Martin-de-las-Heras, 2018 (33) | Cohort          | Spain             | Antenatal care clinic                               | 718         | >20-40+     | ISA <sup>A</sup>                         | BF avoidance (initiation)                | Fair    |
| Miller-Graff, 2018 (20)        | Cohort          | The United States | WIC clinic (Women, infant and children clinic)      | 69          | 26.5 (mean) | CTS <sup>B</sup>                         | BF exclusivity, initiation and cessation | Fair    |
| Tiwari, 2018 (21)              | Cross-sectional | India             | Household                                           | 26,587      | 15-49       | CTS-2 <sup>B</sup>                       | BF duration                              | Good    |
| Wallenborn, 2018 (22)          | Cross-sectional | The United States | PRAMS (Pregnancy Risk Assessment Monitoring System) | 195,264     | <20-35+     | Questionnaire                            | BF initiation and duration               | Good    |
| Boyce, 2017 (23)               | Cross-sectional | India             | Household                                           | 10,469      | 20-29       | Questionnaire                            | Early BF initiation and exclusivity      | Good    |

|                                  |                                        |                   |                                                                              |                           |              |                                                        |                                         |                |
|----------------------------------|----------------------------------------|-------------------|------------------------------------------------------------------------------|---------------------------|--------------|--------------------------------------------------------|-----------------------------------------|----------------|
| <b>Finnbogadottir, 2017 (24)</b> | Cross-sectional                        | Sweden            | Project: "Pregnant women and new mother's life experience"                   | 713                       | 30 (mean)    | Norvold Abuse Questionnaire                            | Exclusive BF                            | Poor           |
| <b>Holland, 2017 (25)</b>        | Cross-sectional                        | The United States | PRAMS (Pregnancy Risk Assessment Monitoring System)                          | 760                       | 20-29        | Questionnaire (based on CDC's monitoring system)       | BF initiation, duration and exclusivity | Unsatisfactory |
| <b>Hasselmann, 2016 (34)</b>     | Cohort                                 | Brazil            | Primary health clinic                                                        | 564                       | <20-20+      | CTS-1 <sup>B</sup>                                     | Interruption of exclusive BF            | Poor           |
| <b>Islam, 2016 (26)</b>          | Cross-sectional                        | India             | Community based survey                                                       | 426                       | 14-25+       | Questionnaire (based on WHO demographic health survey) | Exclusive BF                            | Good           |
| <b>Sorbo, 2015 (35)</b>          | Cohort                                 | Norway            | MoBa (The Norwegian Mother and Child Cohort Study)                           | 53,934                    | 14-35+       | Norvold Abuse Questionnaire                            | Early cessation of any BF               | Fair           |
| <b>James, 2014 (27)</b>          | Cross-sectional (embedded from an RCT) | Australia         | MOVE (Improving maternal and child health nurse care for vulnerable mothers) | 2621                      | 15-35+       | CAS <sup>C</sup>                                       | BF duration                             | Unsatisfactory |
| <b>Moraes, 2011 (28)</b>         | Cross-sectional                        | Brazil            | Public Health Center                                                         | 811                       | <20-20+      | CTS-2 <sup>B</sup>                                     | Early cessation of exclusive BF         | Good           |
| <b>Shroff, 2011 (29)</b>         | Cross-sectional (embedded from an RCT) | India             | Household                                                                    | 600 (mother-infant pairs) | 22.14 (mean) | Questionnaire                                          | Exclusive BF                            | Unsatisfactory |
| <b>Lau, 2007 (30)</b>            | Cross-sectional                        | Hong Kong         | -                                                                            | 1150                      | <25-20+      | AAS <sup>D</sup> , CTS <sup>B</sup>                    | Breastfeeding and mixed feeding         | Good           |
| <b>Silverman, 2006 (31)</b>      | Cross-sectional                        | The United States | PRAMS (Pregnancy Risk Assessment Monitoring System)                          | 118,579                   | <20-30+      | Questionnaire                                          | BF initiation and early cessation       | Satisfactory   |

A: Index of Spouse Abuse, B: Conflict-Tactic Scale, C: Composite Abuse Scale, D: Abuse Assessment Scree

## References

1. Claudia Carcia-Moreno AG, Wendy Knerr. Understanding and addressing violence against women WHO; 2012. Report No.: WHO/RHR/12.36.
2. WHO. Violence against women 2017 [10.04.19]. Available from: <https://www.who.int/en/news-room/fact-sheets/detail/violence-against-women>

- 1  
2  
3  
4 391 3. World Health Organization/London School of Hygiene and Tropical Medicine. Preventing intimate partner and sexual violence  
5 392 against women: taking action and generating evidence. Geneva. 2010. Report No.: 978 92 4 156400 7.
- 6  
7 393 4. WHO. Intimate partner violence during pregnancy. Dept. of Reproductive Health and Research; 2011. Report No.:  
8 394 WHO/RHR/11.35.
- 9 395 5. Jasinski JL. Pregnancy and domestic violence: a review of the literature. *Trauma, violence & abuse*. 2004;5(1):47-64.  
10
- 11 396 6. Sigalla GN, Mushi D, Meyrowitsch DW, Manongi R, Rogathi JJ, Gammeltoft T, et al. Intimate partner violence during  
12 397 pregnancy and its association with preterm birth and low birth weight in Tanzania: A prospective cohort study. *PLoS one*. 2017;12(2):e0172540.
- 13 398 7. WHO. Improving maternal, newborn, infant and young child health and nutrition 2013. Report No.: 978 92 4 150555 0.  
14
- 15 399 8. Chowdhury AN, Ramakrishna J, Chakraborty AK, Weiss MG. Cultural context and impact of alcohol use in the Sundarban Delta,  
16 400 West Bengal, India. *Social Science and Medicine*. 2006;63(3):722-31.
- 17  
18 401 9. Hasselmann MH, Werneck GL, Silva CV. Symptoms of postpartum depression and early interruption of exclusive breastfeeding  
19 402 in the first two months of life. *Cadernos de saude publica*. 2008;24 Suppl 2:S341-52.
- 20 403 10. Wood K, Van Esterik P. Infant feeding experiences of women who were sexually abused in childhood. *Can Fam Physician*.  
21 404 2010;56(4):e136-41.
- 22  
23 405 11. Coles J. Qualitative study of breastfeeding after childhood sexual assault. *Journal of human lactation : official journal of*  
24 406 *International Lactation Consultant Association*. 2009;25(3):317-24.
- 25 407 12. Misch E, Yount K. Intimate Partner Violence and Breastfeeding in Africa. *Maternal & Child Health Journal*. 2014;18(3):688-97.  
26
- 27 408 13. Mezzavilla RDS, Ferreira MDF, Curioni CC, Lindsay AC, Hasselmann MH. Intimate partner violence and breastfeeding  
28 409 practices: a systematic review of observational studies. *Jornal de pediatria*. 2018;94(3):226-37.
- 29  
30 410 14. Moher D, Liberati A, Tetzlaff J, Altman DG. Preferred reporting items for systematic reviews and meta-analyses: the PRISMA  
31 411 statement. *PLoS medicine*. 2009;6(7):e1000097.
- 32 412 15. Stroup DF, Berlin JA, Morton SC, Olkin I, Williamson GD, Rennie D, et al. Meta-analysis of observational studies in  
33 413 epidemiology: a proposal for reporting. Meta-analysis Of Observational Studies in Epidemiology (MOOSE) group. *Jama*. 2000;283(15):2008-12.
- 34  
35 414 16. Schardt C, Adams MB, Owens T, Keitz S, Fontelo P. Utilization of the PICO framework to improve searching PubMed for  
36 415 clinical questions. *BMC Med Inform Decis Mak*. 2007;7:16.
- 37 416 17. Covidence systematic review software, Veritas Health Innovation, Melbourne, Australia. [25.02.19]. Available from:  
38 417 [www.covidence.org](http://www.covidence.org).
- 39  
40 418 18. Coomarasamy A, Khan KS. What is the evidence that postgraduate teaching in evidence based medicine changes anything? A  
41 419 systematic review. *BMJ (Clinical research ed)*. 2004;329(7473):1017.
- 42 420 19. ter Riet G, Kleijnen J, Knipschild P. Acupuncture and chronic pain: a criteria-based meta-analysis. *Journal of clinical*  
43 421 *epidemiology*. 1990;43(11):1191-9.
- 44  
45 422 20. Miller-Graff LE, Ahmed AH, Paulson JL. Intimate Partner Violence and Breastfeeding Outcomes in a Sample of Low-Income  
46 423 Women. *Journal of human lactation : official journal of International Lactation Consultant Association*. 2018;34(3):494-502.
- 47 424 21. Tiwari S, Gray R, Jenkinson C, Carson C. Association between spousal emotional abuse and reproductive outcomes of women in  
48 425 India: findings from cross-sectional analysis of the 2005-2006 National Family Health Survey. *Social psychiatry and psychiatric epidemiology*.  
49 426 2018;53(5):509-19.
- 50  
51 427 22. Wallenborn JT, Cha S, Masho SW. Association Between Intimate Partner Violence and Breastfeeding Duration: Results From  
52 428 the 2004-2014 Pregnancy Risk Assessment Monitoring System. *Journal of human lactation : official journal of International Lactation Consultant*  
53 429 *Association*. 2018;34(2):233-41.
- 54 430 23. Boyce SC, McDougal L, Silverman JG, Atmavilas Y, Dhar D, Hay K, et al. Associations of intimate partner violence with  
55 431 postnatal health practices in Bihar, India. *BMC pregnancy and childbirth*. 2017;17(1):398.
- 56  
57 432 24. Finnbogadottir H, Thies-Lagergren L. Breastfeeding in the context of domestic violence-a cross-sectional study. *Journal of*  
58 433 *advanced nursing*. 2017;73(12):3209-19.
- 59  
60

- 1  
2  
3  
4 434 25. Holland ML, Thevenent-Morrison K, Mittal M, Nelson A, Dozier AM. Breastfeeding and Exposure to Past, Current, and  
5 435 Neighborhood Violence. *Maternal and child health journal*. 2018;22(1):82-91.
- 6  
7 436 26. Islam M, Baird K, Mazerolle P, Broidy L. Exploring the influence of psychosocial factors on exclusive breastfeeding in  
8 437 Bangladesh. *Archives of women's mental health*. 2017;20(1):173-88.
- 9 438 27. James JP, Taft A, Amir LH, Agius P. Does intimate partner violence impact on women's initiation and duration of breastfeeding?  
10 439 Breastfeeding review : professional publication of the Nursing Mothers' Association of Australia. 2014;22(2):11-9.
- 11  
12 440 28. Moraes CL, de Oliveira AS, Reichenheim ME, Lobato G. Severe physical violence between intimate partners during pregnancy:  
13 441 a risk factor for early cessation of exclusive breast-feeding. *Public health nutrition*. 2011;14(12):2148-55.
- 14 442 29. Shroff MR, Griffiths PL, Suchindran C, Nagalla B, Vazir S, Bentley ME. Does maternal autonomy influence feeding practices  
15 443 and infant growth in rural India? *Social science & medicine (1982)*. 2011;73(3):447-55.
- 16  
17 444 30. Lau Y, Chan KS. Influence of intimate partner violence during pregnancy and early postpartum depressive symptoms on  
18 445 breastfeeding among chinese women in Hong Kong. *Journal of midwifery & women's health*. 2007;52(2):e15-e20.
- 19 446 31. Silverman JG, Decker MR, Reed E, Raj A. Intimate partner violence around the time of pregnancy: association with  
20 447 breastfeeding behavior. *Journal of women's health (2002)*. 2006;15(8):934-40.
- 21  
22 448 32. Madsen FK, Holm-Larsen C.E., W., Chunsen, Rogathi, J., Manongi, R., Mushi, D., Meyrowitsch, D. W., Gammeltoft, T., Sigalla,  
23 449 G. N., Rasch, V. . Intimate partner violence and subsequent premature termination of exclusive breastfeeding: A cohort study. *PLOS ONE (in press)*  
24 450 2019.
- 25 451 33. Martin-de-Las-Heras S, Velasco C, Luna-Del-Castillo JD, Khan KS. Breastfeeding avoidance following psychological intimate  
26 452 partner violence during pregnancy: a cohort study and multivariate analysis. *BJOG : an international journal of obstetrics and gynaecology*. 2018.
- 27  
28 453 34. Hasselmann MH, Lindsay AC, Surkan PJ, Vianna GV, Werneck GL. Intimate partner violence and early interruption of exclusive  
29 454 breastfeeding in the first three months of life. *Cadernos de saude publica*. 2016;32(10):e00017816.
- 30 455 35. Sorbo MF, Lukasse M, Brantsaeter AL, Grimstad H. Past and recent abuse is associated with early cessation of breast feeding:  
31 456 results from a large prospective cohort in Norway. *BMJ open*. 2015;5(12):e009240.
- 32  
33 457 36. Khan KS, Ball E, Fox CE, Meads C. Systematic reviews to evaluate causation: an overview of methods and application.  
34 458 Evidence-based medicine. 2012;17(5):137-41.
- 35 459 37. Schriger DL, Altman DG, Vetter JA, Heafner T, Moher D. Forest plots in reports of systematic reviews: a cross-sectional study  
36 460 reviewing current practice. *Int J Epidemiol*. 2010;39(2):421-9.
- 37  
38 461 38. da Costa BR, Cevallos M, Altman DG, Rutjes AW, Egger M. Uses and misuses of the STROBE statement: bibliographic study.  
39 462 *BMJ open*. 2011;1(1):e000048.
- 40 463 39. von Elm E, Altman DG, Egger M, Pocock SJ, Gotsche PC, Vandenbroucke JP. The Strengthening the Reporting of  
41 464 Observational Studies in Epidemiology (STROBE) statement: guidelines for reporting observational studies. *Lancet*. 2007;370(9596):1453-7.
- 42  
43 465 40. Stang A. Critical evaluation of the Newcastle-Ottawa scale for the assessment of the quality of nonrandomized studies in meta-  
44 466 analyses. *Eur J Epidemiol*. 2010;25(9):603-5.
- 45 467 41. Luchini CS, B.; Solmi, M.; Veronese, N. . Assessing the quality of studies in meta-analyses: Advantages and limitations of the  
46 468 New Castle Ottawa Scale *World Journal of Meta-Analysis* 2017.
- 47  
48 469 42. Widom CS, Czaja SJ, Dutton MA. Childhood victimization and lifetime revictimization. *Child abuse & neglect*. 2008;32(8):785-  
49 470 96.
- 50 471 43. Elfgén C, Hagenbuch N, Gorres G, Block E, Leeners B. Breastfeeding in Women Having Experienced Childhood Sexual Abuse.  
51 472 *Journal of human lactation : official journal of International Lactation Consultant Association*. 2017;33(1):119-27.
- 52  
53 473 44. Eagen-Torkko M, Low LK, Zielinski R, Seng JS. Prevalence and Predictors of Breastfeeding After Childhood Abuse. *Journal of*  
54 474 *obstetric, gynecologic, and neonatal nursing : JOGNN*. 2017;46(3):465-79.
- 55 475 45. Gracia E. Unreported cases of domestic violence against women: towards an epidemiology of social silence, tolerance, and  
56 476 inhibition. *Journal of epidemiology and community health*. 2004;58(7):536-7.
- 57  
58 477 46. Henderson JJ, Evans SF, Straton JA, Priest SR, Hagan R. Impact of postnatal depression on breastfeeding duration. *Birth*.  
59 478 2003;30(3):175-80.
- 60

1  
2  
3  
4  
5  
6  
7  
8  
9  
10  
11  
12  
13  
14  
15  
16  
17  
18  
19  
20  
21  
22  
23  
24  
25  
26  
27  
28  
29  
30  
31  
32  
33  
34  
35  
36  
37  
38  
39  
40  
41  
42  
43  
44  
45  
46  
47  
48  
49  
50  
51  
52  
53  
54  
55  
56  
57  
58  
59  
60

479  
480

47. Hatton DC, Harrison-Hohner J, Coste S, Dorato V, Curet LB, McCarron DA. Symptoms of postpartum depression and breastfeeding. *Journal of human lactation : official journal of International Lactation Consultant Association*. 2005;21(4):444-9; quiz 50-4.

481  
482

48. Stuebe AM, Grewen K, Pedersen CA, Propper C, Meltzer-Brody S. Failed lactation and perinatal depression: common problems with shared neuroendocrine mechanisms? *Journal of women's health (2002)*. 2012;21(3):264-72.

483  
484

49. Williamson PR, Altman, D.G., Bagley, H. et al. The COMET Handbook: version 1.0 *The COMET Handbook: version 1.0*. *Trials* 18, 280 2017.

485  
486

50. Rogozinska E, Marlin N, Thangaratinam S, Khan KS, Zamora J. Meta-analysis using individual participant data from randomised trials: opportunities and limitations created by access to raw data. *Evidence-based medicine*. 2017;22(5):157-62.

487

488

489

### Figure legends

490

Figure 1 **Flow chart of study selection in the review of intimate partner violence and breastfeeding outcomes**

492

Figure 2 **Study quality of cohort and cross-sectional studies in the review of intimate partner violence and**

493

**breastfeeding outcomes**

494

Figure 3 **Results of physical violence and the association with breastfeeding duration, breastfeeding initiation and exclusive breastfeeding presented in a Forest plot ordered according to descending quality**

495

1  
2  
3  
4  
5  
6  
7  
8  
9  
10  
11  
12  
13  
14  
15  
16  
17  
18  
19  
20  
21  
22  
23  
24  
25  
26  
27  
28  
29  
30  
31  
32  
33  
34  
35  
36  
37  
38  
39  
40  
41  
42  
43  
44  
45  
46  
47  
48  
49  
50  
51  
52  
53  
54  
55  
56  
57  
58  
59  
60

For peer review only

1  
2  
3  
4  
5  
6  
7  
8  
9  
10  
11  
12  
13  
14  
15  
16  
17  
18  
19  
20  
21  
22  
23  
24  
25  
26  
27  
28  
29  
30  
31  
32  
33  
34  
35  
36  
37  
38  
39  
40  
41  
42  
43  
44  
45  
46  
47  
48  
49  
50  
51  
52  
53  
54  
55  
56  
57  
58  
59  
60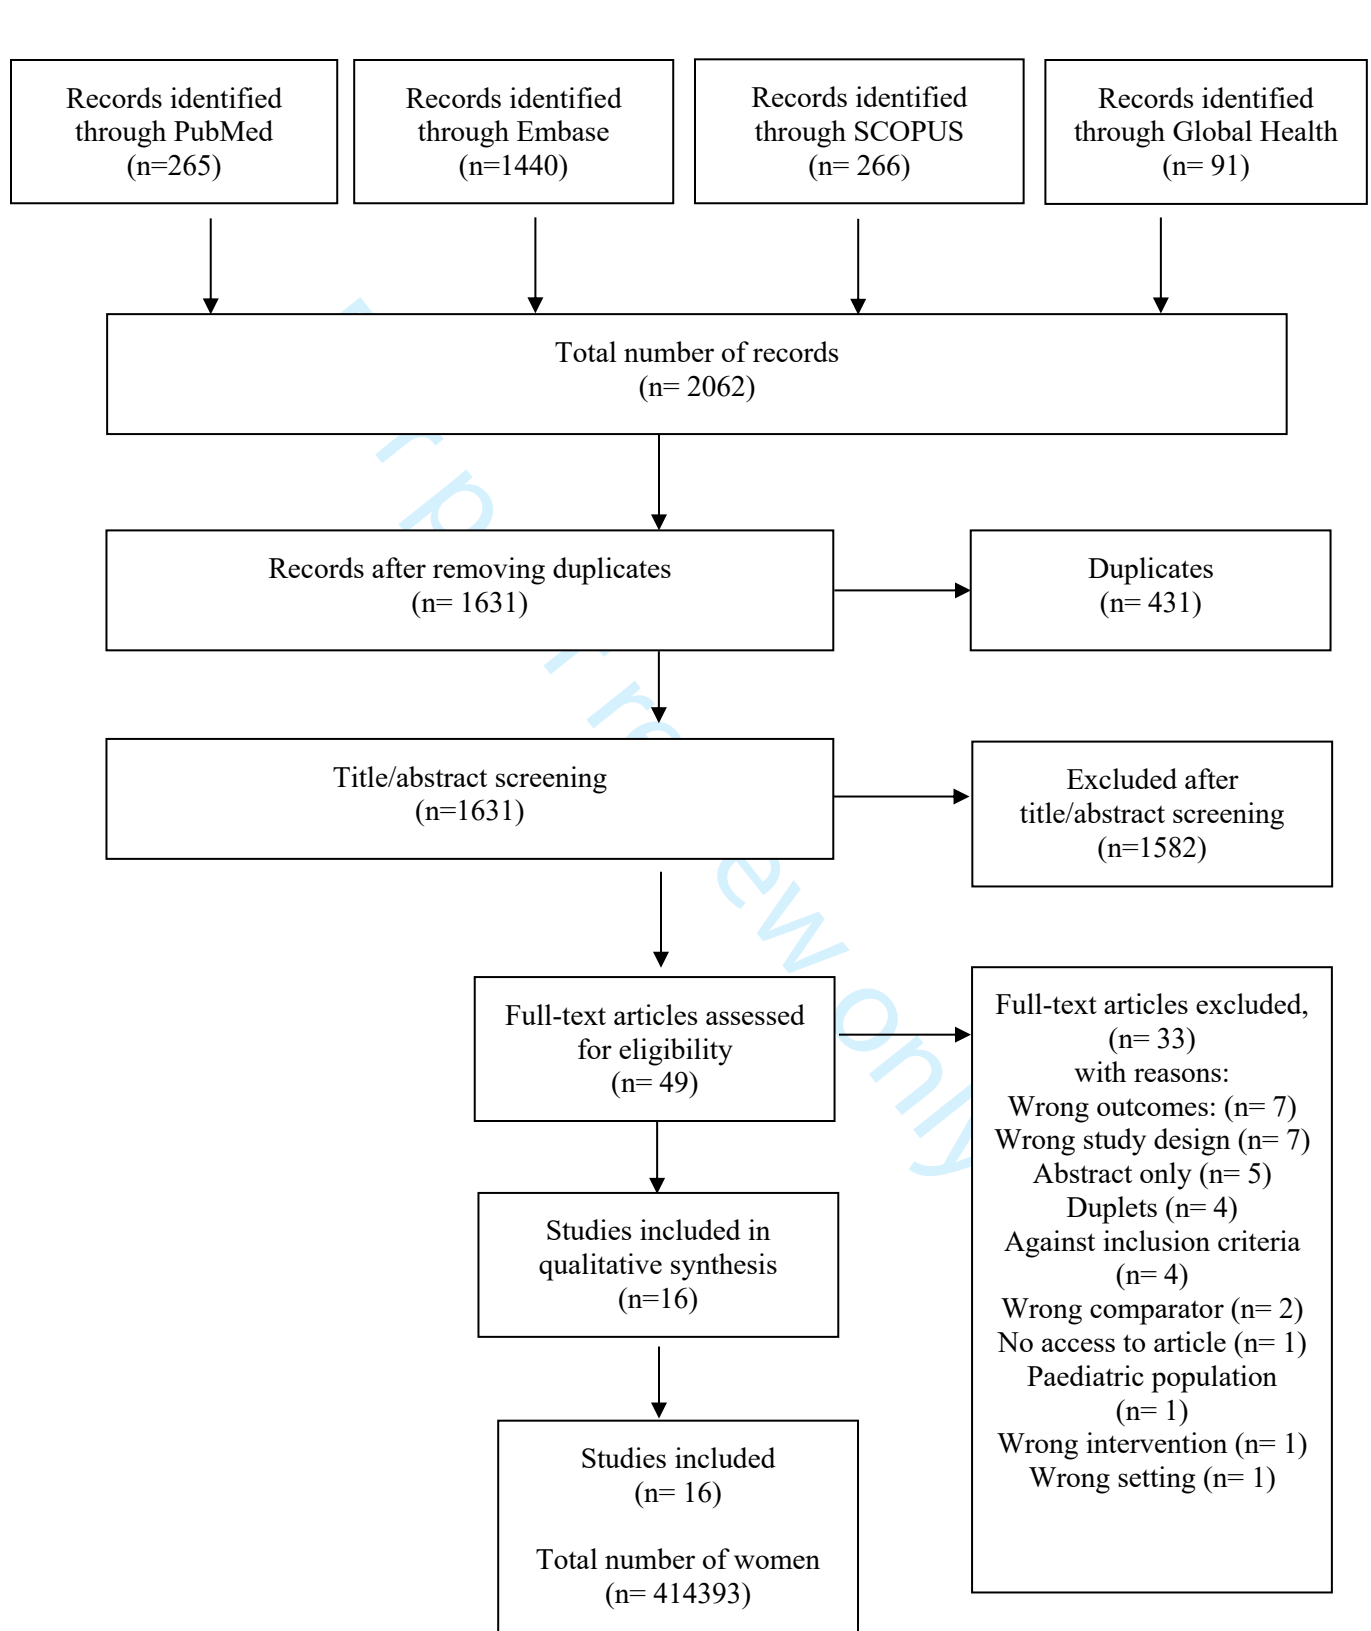

**Figure 2: Study quality of cohort and cross-sectional studies in the review of intimate partner violence and breastfeeding outcomes**

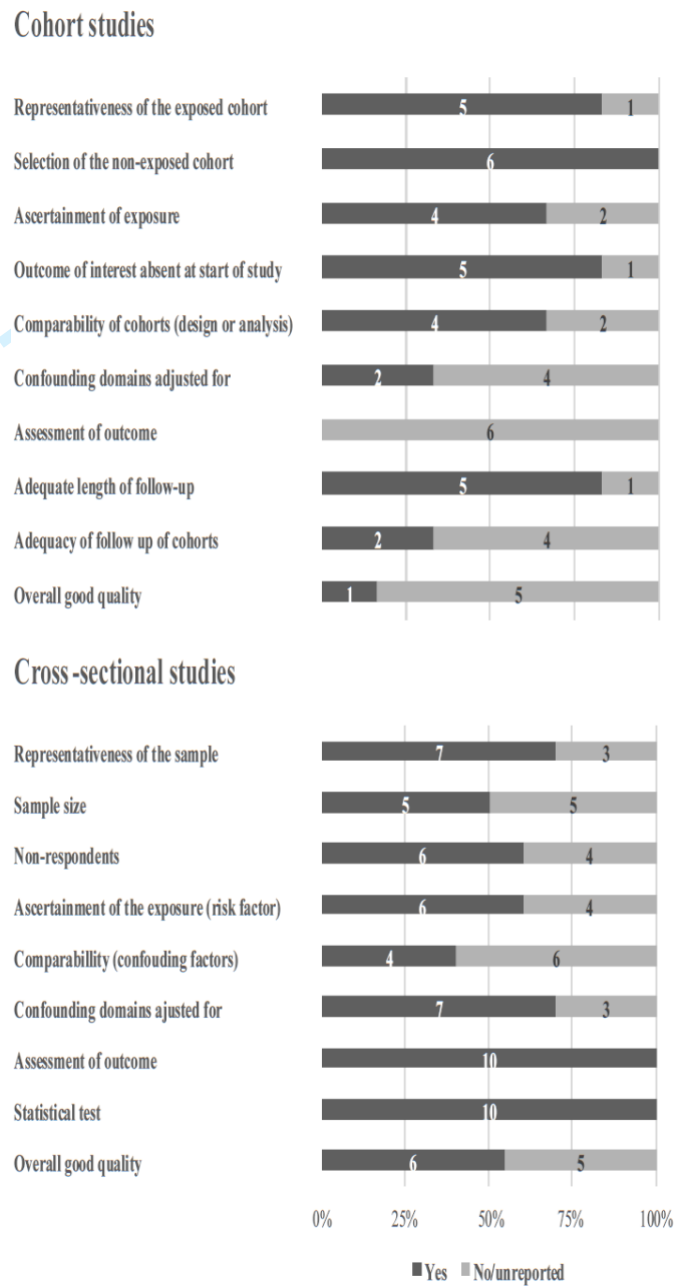

In the figure illustration of the NOS scale, the studies, which reached a maximum of stars in each category of the NOS-scale was rewarded a 'yes' and further if the studies adjusted for more than four confounding domains, they were rewarded a 'yes' (see appendix S2.2)



**Figure 3: Results of physical violence and association with breastfeeding duration, breastfeeding initiation and exclusive breastfeeding presented in a Forest plot ordered according to descending quality**

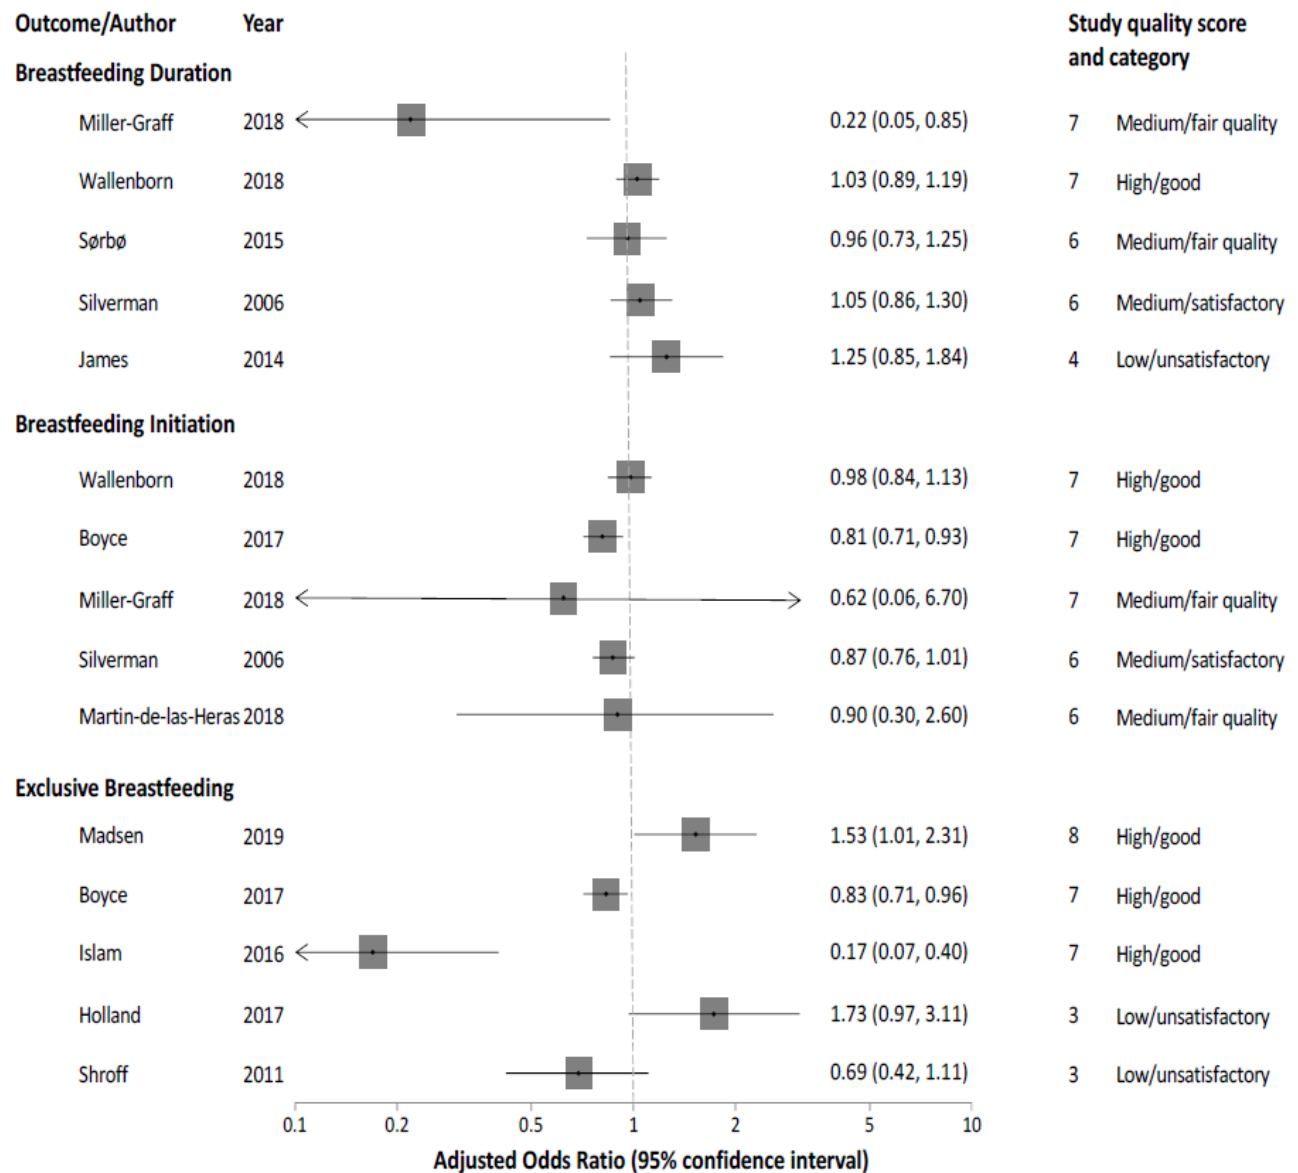

**Appendix, S1: Search strategy**

**Embase search: Searched on the 11<sup>th</sup> of March with a total result of 1382 articles**

| #ID | Search                                                                                                                                                                                                                             |
|-----|------------------------------------------------------------------------------------------------------------------------------------------------------------------------------------------------------------------------------------|
| 1   | Exp partner violence/                                                                                                                                                                                                              |
| 2   | Exp domestic violence/                                                                                                                                                                                                             |
| 3   | Exp physical abuse/                                                                                                                                                                                                                |
| 4   | Exp battered woman/                                                                                                                                                                                                                |
| 5   | Exp breast feeding/                                                                                                                                                                                                                |
| 6   | Exp breast milk expression/                                                                                                                                                                                                        |
| 7   | Exp feeding behavior                                                                                                                                                                                                               |
| 8   | Exp lactation                                                                                                                                                                                                                      |
| 9   | Exp milk ejection                                                                                                                                                                                                                  |
| 10  | "intimate partner violence"                                                                                                                                                                                                        |
| 11  | "dating violence"                                                                                                                                                                                                                  |
| 12  | "partner violence"                                                                                                                                                                                                                 |
| 13  | "partner homicide"                                                                                                                                                                                                                 |
| 14  | "psychological violence"                                                                                                                                                                                                           |
| 15  | "psychological abuse"                                                                                                                                                                                                              |
| 16  | "spouse abuse"                                                                                                                                                                                                                     |
| 17  | "spousal abuse"                                                                                                                                                                                                                    |
| 18  | "wife abuse"                                                                                                                                                                                                                       |
| 19  | "partner abuse"                                                                                                                                                                                                                    |
| 20  | "domestic violence"                                                                                                                                                                                                                |
| 21  | "family violence"                                                                                                                                                                                                                  |
| 22  | "physical abuse"                                                                                                                                                                                                                   |
| 23  | "physical violence"                                                                                                                                                                                                                |
| 24  | "physical maltreatment"                                                                                                                                                                                                            |
| 25  | "sex offenses"                                                                                                                                                                                                                     |
| 26  | "sexual violence"                                                                                                                                                                                                                  |
| 27  | "sexual harm"                                                                                                                                                                                                                      |
| 28  | "sexual coercion"                                                                                                                                                                                                                  |
| 29  | "battered woman"                                                                                                                                                                                                                   |
| 30  | "battered women"                                                                                                                                                                                                                   |
| 31  | "abused women"                                                                                                                                                                                                                     |
| 32  | "abused woman"                                                                                                                                                                                                                     |
| 33  | "relationship violence"                                                                                                                                                                                                            |
| 34  | "relationship aggression"                                                                                                                                                                                                          |
| 35  | "couple violence"                                                                                                                                                                                                                  |
| 36  | "spousal violence"                                                                                                                                                                                                                 |
| 37  | "domestic abuse"                                                                                                                                                                                                                   |
| 38  | "wife beating"                                                                                                                                                                                                                     |
| 39  | "physical harm"                                                                                                                                                                                                                    |
| 40  | "physical aggression"                                                                                                                                                                                                              |
| 41  | "emotional violence"                                                                                                                                                                                                               |
| 42  | "emotional abuse"                                                                                                                                                                                                                  |
| 43  | "emotional harm"                                                                                                                                                                                                                   |
| 44  | "violence against women"                                                                                                                                                                                                           |
| 45  | 1 or 2 or 3 or 4 or 10 or 11 or 12 or 13 or 14 or 15 or 16 or 17 or 18 or 19 or 20 or 21 or 22 or 23 or 24 or 25 or 26 or 27 or 28 or 29 or 30 or 31 or 32 or 33 or 34 or 35 or 36 or 37 or 38 or 39 or 40 or 41 or 42 or 43 or 44 |
| 46  | Exp sexual abuse                                                                                                                                                                                                                   |
| 47  | Controlling behavior                                                                                                                                                                                                               |
| 48  | 45 or 46 or 47                                                                                                                                                                                                                     |
| 49  | "sexual abuse"                                                                                                                                                                                                                     |
| 50  | 48 or 49                                                                                                                                                                                                                           |
| 51  | "exclusive breastfeeding"                                                                                                                                                                                                          |
| 52  | "breastfeeding duration"                                                                                                                                                                                                           |
| 53  | "breastfeeding intention"                                                                                                                                                                                                          |
| 54  | "pumping breast"                                                                                                                                                                                                                   |
| 55  | "human milk"                                                                                                                                                                                                                       |
| 56  | "breast milk"                                                                                                                                                                                                                      |
| 57  | "milk secretion"                                                                                                                                                                                                                   |
| 58  | "milk let-down"                                                                                                                                                                                                                    |
| 59  | 5 or 6 or 7 or 8 or 51 or 52 or 53 or 54 or 55 or 57 or 58                                                                                                                                                                         |
| 60  | Feeding behavior                                                                                                                                                                                                                   |
| 61  | Feeding pattern                                                                                                                                                                                                                    |
| 62  | "feeding patterns"                                                                                                                                                                                                                 |

|    |                                                                      |
|----|----------------------------------------------------------------------|
| 63 | 59 or 60 or 61 or 62                                                 |
| 64 | Feeding behaviors                                                    |
| 65 | 63 or 64                                                             |
| 66 | "exclusive breast feeding"                                           |
| 67 | "exclusive breast feedings"                                          |
| 68 | "breast feedings"                                                    |
| 69 | "breast feeding"                                                     |
| 70 | "breastmilk expression"                                              |
| 71 | "breastmilk expressions"                                             |
| 72 | "milk collection"                                                    |
| 73 | "milk collections"                                                   |
| 74 | "breast pumping"                                                     |
| 75 | "milk secretion"                                                     |
| 76 | "milk secretions"                                                    |
| 77 | 65 or 66 or 67 or 68 or 69 or 70 or 71 or 72 or 73 or 74 or 75 or 76 |
| 78 | Lactations                                                           |
| 79 | Lactation                                                            |
| 80 | 77 or 78 or 79                                                       |
| 81 | 50 and 80                                                            |

### Global Health Library search: Searched on the 12<sup>th</sup> of March with a total result of 91 articles

| #ID | Search                                                                                                                                                                            |
|-----|-----------------------------------------------------------------------------------------------------------------------------------------------------------------------------------|
| S1  | "intimate partner violence" OR "dating violence" OR "partner violence" OR "partner homicide" OR "psychological abuse" OR "psychological violence"                                 |
| S2  | "spouse abuse" OR "spousal abuse" OR "wife abuse" OR "partner abuse"                                                                                                              |
| S3  | S3 OR S2                                                                                                                                                                          |
| S4  | "domestic violence" OR "family violence"                                                                                                                                          |
| S5  | S4 OR S3                                                                                                                                                                          |
| S6  | "physical abuse" OR "physical violence" OR "physical maltreatment"                                                                                                                |
| S7  | S6 OR S5                                                                                                                                                                          |
| S8  | "sexual assault" OR "sex offenses" OR "sexual violence" OR "sexual abuse" OR "sexual harm" OR "sexual coercion"                                                                   |
| S9  | S8 OR S7                                                                                                                                                                          |
| S10 | "battered woman" OR "battered women" OR "abused woman" OR "abused women"                                                                                                          |
| S11 | S10 OR S9                                                                                                                                                                         |
| S12 | "relationship violence" OR "relationship aggression" OR "couple violence" OR "spousal violence" OR "domestic abuse" OR "wife beating" OR "physical harm" OR "physical aggression" |
| S13 | S12 OR S11                                                                                                                                                                        |
| S14 | "emotional violence" OR "emotional abuse" OR "emotional harm" OR "controlling behaviour" OR "violence against women"                                                              |
| S15 | S14 OR S13                                                                                                                                                                        |
| S16 | "breast feeding" OR "breastfeeding" OR "exclusive breast feeding" OR "exclusive breastfeeding" OR "breastfeeding duration" OR "breastfeeding intention"                           |
| S17 | "breast milk expression" OR "breast milk expressions" OR "milk collection" OR "milk collections" OR "breast pumping" OR "pumping breast"                                          |
| S18 | S17 OR S16                                                                                                                                                                        |
| S19 | "feeding behaviour" OR "feeding behaviors" OR "feeding pattern" OR "feeding patterns" OR "human milk" OR "milk, human"                                                            |
| S20 | S19 OR S18                                                                                                                                                                        |
| S21 | Lactation OR lactations OR "milk secretion" OR "milk secretions" OR "milk ejection" OR "milk let-down"                                                                            |
| S22 | S21 OR S20                                                                                                                                                                        |
| S23 | S22 AND S15                                                                                                                                                                       |

### PubMed search: Searched on the 8<sup>th</sup> of March with a total result of 253 articles

(((((("Breast Feeding"[Mesh]) OR breastfeeding) OR exclusive breast fe\*) OR "exclusive breastfeeding") OR "breastfeeding duration") OR breast fe\*) OR "breastfeeding intention")) OR (((("Breast Milk Expression"[Mesh]) OR breast milk expression\*) OR breastmilk expression\*) OR milk collection\*) OR breast pumping\*) OR "pumping breast") OR (((("Feeding Behavior"[Mesh]) OR feeding behavior\*) OR feeding pattern\*)) OR ((("Milk, Human"[Mesh]) OR "human milk")) OR (((("Lactation"[Mesh]) OR milk secretion\*) OR lactation\*)) OR ((("Milk Ejection"[Mesh]) OR "milk let-down")) AND (((((((((((((((("relationship violence") OR "relationship aggression") OR "couple violence") OR "spousal violence") OR "domestic abuse") OR "wife beating") OR "physical harm") OR "physical aggression") OR "emotional violence") OR "emotional abuse") OR "emotional harm") OR controlling behavior\*) OR "violence against women")) OR (((("Battered Women"[Mesh]) OR "Battered Woman") OR "abused women") OR "abused woman")) OR (((("Sex Offenses"[Mesh]) OR "sex offenses") OR "sexual violence") OR sexual abuse\*) OR "sexual harm") OR "sexual coercion")) OR (((("Physical Abuse"[Mesh]) OR "physical abuse") OR "physical violence") OR "physical maltreatment")) OR (((("Domestic Violence"[Mesh]) OR "domestic violence") OR "family violence")) OR (((("Spouse

1  
2  
3  
4 Abuse"[Mesh]) OR "spouse abuse") OR "spousal abuse") OR "wife abuse") OR "partner abuse")) OR ((((((("Intimate  
5 Partner Violence"[Mesh]) OR "intimate partner violence") OR "dating violence") OR "partner violence") OR "partner  
6 homicide") OR "psychological violence") OR "psychological abuse"))  
7  
8

9 **SCOPUS: Searched on the 11<sup>th</sup> of March with a total result of 257 articles**

10 (((((TITLE-ABS-KEY("breast feeding")) OR (TITLE-ABS-KEY("breastfeeding intention")))) OR ((TITLE-ABS-  
11 KEY(breastfeeding)) OR (TITLE-ABS-KEY("breastfeeding duration" ))) OR ((TITLE-ABS-KEY("exclusive breast  
12 feeding" )) OR (TITLE-ABS-KEY("exclusive breastfeeding" )))) OR ((TITLE-ABS-KEY("breast milk expression"))  
13 OR (TITLE-ABS-KEY("breast milk expressions" )) OR (TITLE-ABS-KEY("breastmilk expression" )) OR (TITLE-  
14 ABS-KEY("breastmilk expressions")) OR (TITLE-ABS-KEY("milk collections" )) OR (TITLE-ABS-KEY("milk  
15 collection")) OR (TITLE-ABS-KEY("breast pumping" )) OR (TITLE-ABS-KEY("pumping breast")) OR ((TITLE-  
16 ABS-KEY("feeding behavior" )) OR (TITLE-ABS-KEY("feeding pattern")) OR (TITLE-ABS-KEY("human milk" ))  
17 OR (TITLE-ABS-KEY("milk, human")) OR (TITLE-ABS-KEY("breast milk")) OR ((TITLE-ABS-KEY(lactation))  
18 OR (TITLE-ABS-KEY("milk secretion" )) OR (TITLE-ABS-KEY("milk ejection")) OR (TITLE-ABS-KEY("milk let-  
19 down")))) AND (((TITLE-ABS-KEY("intimate partner violence")) OR (TITLE-ABS-KEY("dating violence" )) OR  
20 (TITLE-ABS-KEY("partner violence" )) OR (TITLE-ABS-KEY("partner homicide")) OR (TITLE-ABS-  
21 KEY("psychological violence" )) OR (TITLE-ABS-KEY("psychological abuse" ))) OR (((TITLE-ABS-KEY("spouse  
22 abuse")) OR (TITLE-ABS-KEY("spousal abuse" ))) OR (TITLE-ABS-KEY("wife abuse" )) OR (TITLE-ABS-  
23 KEY("partner abuse" ))) OR ((TITLE-ABS-KEY("domestic violence" )) OR (TITLE-ABS-KEY("family violence" ))  
24 OR (TITLE-ABS-KEY("physical abuse" )) OR (TITLE-ABS-KEY("physical violence" )) OR (TITLE-ABS-  
25 KEY("physical maltreatment")) OR ((TITLE-ABS-KEY("sex offenses" )) OR (TITLE-ABS-KEY("sexual violence"))  
26 OR (TITLE-ABS-KEY("sexual abuse")) (TITLE-ABS-KEY("sexual harm" )) OR (TITLE-ABS-KEY("sexual  
27 coercion" )) OR (((TITLE-ABS-KEY("battered women" )) OR (TITLE-ABS-KEY("battered woman")) OR ((TITLE-  
28 ABS-KEY("abused woman" )) OR (TITLE-ABS-KEY("abused women")))) OR (((TITLE-ABS-KEY("relationship  
29 aggression")) OR (TITLE-ABS-KEY("couple violence" )) OR (TITLE-ABS-KEY("relationship violence" ))) OR  
30 (TITLE-ABS-KEY("spousal violence")) OR ((TITLE-ABS-KEY("domestic violence" )) OR (TITLE-ABS-KEY("wife  
31 beating" )) OR (TITLE-ABS-KEY("physical harm" )) OR (TITLE-ABS-KEY("physical aggression" ))) OR ((TITLE-  
32 ABS-KEY("emotional violence" )) OR (TITLE-ABS-KEY("emotional abuse")) OR (TITLE-ABS-KEY("emotional  
33 harm")) OR (TITLE-ABS-KEY("controlling behavior" ))) OR (TITLE-ABS-KEY("violence against women" )))  
34  
35  
36  
37  
38  
39  
40  
41  
42  
43  
44  
45  
46  
47  
48  
49  
50  
51  
52  
53  
54  
55  
56  
57  
58  
59  
60

1  
2  
3  
4  
5  
6  
7  
8  
9  
10  
11  
12  
13  
14  
15  
16  
17  
18  
19  
20  
21  
22  
23  
24  
25  
26  
27  
28  
29  
30  
31  
32  
33  
34  
35  
36  
37  
38  
39  
40  
41  
42  
43  
44  
45  
46  
47  
48  
49  
50  
51  
52  
53  
54  
55  
56  
57  
58  
59  
60

## Appendix, S2: Data synthesis tables

Table S2.1: Results of NOS quality assessment

| Cohort studies                    |                                          |                                     |                           |                                                                          |                                                                                                                                    |                                               |                           |                                                 |                                  |              |                                        |
|-----------------------------------|------------------------------------------|-------------------------------------|---------------------------|--------------------------------------------------------------------------|------------------------------------------------------------------------------------------------------------------------------------|-----------------------------------------------|---------------------------|-------------------------------------------------|----------------------------------|--------------|----------------------------------------|
| Study                             | Selection (maximum 4 stars)              |                                     |                           |                                                                          | Comparability (maximum 2 stars)                                                                                                    |                                               | Outcome (maximum 3 stars) |                                                 |                                  | No. of stars | No. of stars with domains adjusted for |
|                                   | Representativeness of the exposed cohort | Selection of the non-exposed cohort | Ascertainment of exposure | Demonstration that outcome of interest was not present at start of study | Comparability of cohorts on the basis of the design or analysis                                                                    | Confounding domains adjusted for (table S2.1) | Assessment of outcome     | Was follow-up long enough for outcomes to occur | Adequacy of follow up of cohorts |              |                                        |
| Madsen, 2019                      | *                                        | *                                   | *                         | *                                                                        | **                                                                                                                                 | **                                            | -                         | *                                               | *                                | 8            | 10                                     |
| Martin-de-las-heras, 2018         | *                                        | *                                   | *                         | *                                                                        | **                                                                                                                                 | *****                                         | -                         | -                                               | -                                | 6            | 12                                     |
| Miller-Graff, 2018                | -                                        | *                                   | *                         | *                                                                        | **                                                                                                                                 | ****                                          | -                         | *                                               | *                                | 7            | 11                                     |
| Finnbogadottir, 2017 <sup>A</sup> | *                                        | *                                   | -                         | *                                                                        | -                                                                                                                                  | -                                             | -                         | *                                               | -                                | 4            | 4                                      |
| Hasselmann, 2016                  | *                                        | *                                   | *                         | -                                                                        | -                                                                                                                                  | ***                                           | -                         | *                                               | -                                | 4            | 7                                      |
| Sørnbø, 2015                      | *                                        | *                                   | -                         | *                                                                        | **                                                                                                                                 | ***                                           | -                         | *                                               | -                                | 6            | 9                                      |
| Cross-sectional studies           |                                          |                                     |                           |                                                                          |                                                                                                                                    |                                               |                           |                                                 |                                  |              |                                        |
| Study                             | Selection (maximum 5 stars)              |                                     |                           |                                                                          | Comparability (maximum 2 stars)                                                                                                    |                                               | Outcome (maximum 3 stars) |                                                 | No. of stars                     |              |                                        |
|                                   | Representativeness of the sample         | Sample size                         | Non-respondents           | Ascertainment of the exposure (risk factor)                              | The subjects in different outcome groups are comparable, based on the study design or analysis. Confounding factors are controlled | Confounding domains adjusted for (table S2.1) | Assessment of outcome     | Statistical test                                |                                  |              |                                        |
| Tiwari, 2018                      | *                                        | *                                   | *                         | **                                                                       | *                                                                                                                                  | ****                                          | *                         | *                                               | 8                                | 12           |                                        |
| Wallenborn, 2018                  | *                                        | *                                   | -                         | **                                                                       | *                                                                                                                                  | *****                                         | *                         | *                                               | 7                                | 12           |                                        |
| Boyce, 2017                       | *                                        | *                                   | *                         | **                                                                       | -                                                                                                                                  | -                                             | *                         | *                                               | 7                                | 7            |                                        |
| Holland, 2017                     | -                                        | -                                   | -                         | *                                                                        | -                                                                                                                                  | ****                                          | *                         | *                                               | 3                                | 7            |                                        |
| Islam, 2016                       | *                                        | -                                   | *                         | *                                                                        | **                                                                                                                                 | *****<br>*                                    | *                         | *                                               | 7                                | 16           |                                        |
| James, 2014                       | -                                        | -                                   | -                         | **                                                                       | -                                                                                                                                  | ***                                           | *                         | *                                               | 4                                | 7            |                                        |

|                 |   |   |   |    |    |       |   |   |   |    |
|-----------------|---|---|---|----|----|-------|---|---|---|----|
| Moraes, 2011    | * | - | * | ** | ** | ****  | * | * | 8 | 12 |
| Shroff, 2011    | - | - | - | *  | -  | ***** | * | * | 3 | 8  |
| Lau, 2007       | * | * | * | ** | -  | ***** | * | * | 7 | 12 |
| Silverman, 2006 | * | * | * | *  | -  | ***   | * | * | 6 | 9  |

A Cross-sectional study embedded from a cohort. Analyzed with NOS for cohort.

For peer review only

Table S2.2: Confounders adjusted for in studies

| Reference                      | Domain  |                               |                                        |                            |                       |                              |                                     |                                   |                     |                    | Outcome                                  |
|--------------------------------|---------|-------------------------------|----------------------------------------|----------------------------|-----------------------|------------------------------|-------------------------------------|-----------------------------------|---------------------|--------------------|------------------------------------------|
|                                | Economy | Maternal lifestyle and health | Pregnancy/post partum related problems | Maternal socio-demographic | Child characteristics | Relationship characteristics | Support during pregnancy/postpartum | Violence or stressful life events | Pregnancy intention | Caste and religion |                                          |
| Madsen, 2019 (32)              |         | x                             |                                        | x                          |                       |                              |                                     |                                   |                     |                    | Premature termination of exclusive BF    |
| Martin-de-las-Heras, 2018 (33) |         | x                             | x                                      | x                          |                       | x                            | x                                   |                                   | x                   |                    | BF avoidance (initiation)                |
| Miller-Graff, 2018 (20)        | x       |                               | x                                      |                            |                       |                              | x                                   | x                                 |                     |                    | BF exclusivity, initiation and cessation |
| Tiwari, 2018 (21)              | x       |                               |                                        | x                          |                       | x                            |                                     | x                                 |                     | x                  | BF duration                              |
| Wallenborn, 2018 (22)          | x       |                               |                                        | x                          |                       | x                            |                                     | x                                 | x                   |                    | BF initiation and duration               |
| Boyce, 2017* (23)              |         |                               |                                        |                            |                       |                              |                                     |                                   |                     |                    | Early BF initiation and exclusivity      |
| Finnbogadottir, 2017 (24)      | NA      | NA                            | NA                                     | NA                         | NA                    | NA                           | NA                                  | NA                                | NA                  | NA                 | Exclusive BF                             |
| Holland, 2017 (25)             |         | x                             | x                                      | x                          |                       |                              |                                     | x                                 |                     |                    | BF initiation, duration and exclusivity  |
| Hasselmann, 2016 (34)          |         |                               |                                        | x                          | x                     | x                            |                                     |                                   |                     |                    | Interruption of exclusive BF             |
| Islam, 2016 (26)               | x       | x                             | x                                      | x                          | x                     | x                            | x                                   | x                                 | x                   |                    | Exclusive BF                             |
| Sørbo, 2015 (35)               |         |                               |                                        | x                          |                       | x                            |                                     | x                                 |                     |                    | Early cessation of any BF                |
| James, 2014 (27)               | x       |                               | x                                      | x                          |                       |                              |                                     |                                   |                     |                    | BF duration                              |
| Moraes, 2011 (28)              |         | x                             |                                        | x                          | x                     |                              | x                                   |                                   |                     |                    | Early cessation of exclusive BF          |
| Shroff, 2011 (29)              |         | x                             |                                        | x                          | x                     | x                            |                                     |                                   |                     | x                  | Exclusive BF                             |
| Lau, 2007 (30)                 |         | x                             | x                                      | x                          |                       | x                            |                                     |                                   | x                   |                    | Breastfeeding and mixed feeding          |
| Silverman, 2006 (31)           |         | x                             |                                        | x                          |                       | x                            |                                     |                                   |                     |                    | BF initiation and early cessation        |

\*Article states that the association between IPV and BF was adjusting for any covariate that were significant at  $p < 0,20$  levels in bivariate analysis, but results not shown

NA (not applicable)

#### Explanation of following groups of confounders:

Economy: Insurance and receipt of government assistance

Maternal lifestyle and health: Smoking, substance use prior to pregnancy, substance use all time, maternal health status, mothers BMI, HIV status

Pregnancy and postpartum related problems: Pregnancy health problems, preterm labor, mode of birth, complications during birth, mother/infant separation after birth, antenatal complications, postnatal complications, reasons for stopping BF and resuscitation

1  
2  
3  
4 Maternal sociodemographic: Maternal age, maternal education, maternal race/ethnicity, first baby/number of the child,  
5 employment status, place of residence, parity, occupation, number of years lived in the U.S and language  
6 Child characteristics: Gender of child, age of child, low birthweight/birth weight, child health  
7 Relationship characteristics: Marital status, relationship characteristics, partner's education level, family structure,  
8 cohabitation  
9 Support during pregnancy and postpartum: Prenatal BF education, number of antenatal care visits/health care services,  
10 kin support, social support, type of maternity clinic  
11 Violence or stressful life events: Stressful live events 12 months before pregnancy, depression, childhood abuse, other  
12 forms of IPV  
13 Pregnancy intention  
14 Caste and religion  
15  
16  
17  
18  
19  
20  
21  
22  
23  
24  
25  
26  
27  
28  
29  
30  
31  
32  
33  
34  
35  
36  
37  
38  
39  
40  
41  
42  
43  
44  
45  
46  
47  
48  
49  
50  
51  
52  
53  
54  
55  
56  
57  
58  
59  
60



**Table S2.3: Early cessation/shortened duration of breastfeeding (aOR; 95% CI) vs. no cessation of breastfeeding**

| Reference                      | Exposed to IPV* prior to pregnancy                                                                       | Exposed to IPV* during pregnancy/post-partum | Exposed to any IPV** prior to pregnancy                                                                                                                                                                                                                                                                | Exposed to any IPV** during pregnancy/post-partum |
|--------------------------------|----------------------------------------------------------------------------------------------------------|----------------------------------------------|--------------------------------------------------------------------------------------------------------------------------------------------------------------------------------------------------------------------------------------------------------------------------------------------------------|---------------------------------------------------|
| Madsen, 2019 (32)              |                                                                                                          |                                              |                                                                                                                                                                                                                                                                                                        |                                                   |
| Martin-de-las-Heras, 2018 (33) |                                                                                                          |                                              |                                                                                                                                                                                                                                                                                                        |                                                   |
| Miller-Graff, 2018 (20)        | P + E + S: 0.22 (0.05-0.85) <sup>A</sup>                                                                 |                                              |                                                                                                                                                                                                                                                                                                        |                                                   |
| Tiwari, 2018 (21)              | E: 1.07 (0.81-1.41) <sup>B</sup>                                                                         |                                              |                                                                                                                                                                                                                                                                                                        |                                                   |
| Wallenborn, 2018 (22)          | P: 1.18 (1.01-1.37) <sup>L</sup>                                                                         | P: 1.15 (0.94-1.4) <sup>L</sup>              |                                                                                                                                                                                                                                                                                                        |                                                   |
|                                | P: 1.03 (0.89-1.19) <sup>L</sup>                                                                         |                                              |                                                                                                                                                                                                                                                                                                        |                                                   |
| Boyce, 2017 (23)               |                                                                                                          |                                              |                                                                                                                                                                                                                                                                                                        |                                                   |
| Finnbogadottir, 2017 (24)      |                                                                                                          |                                              |                                                                                                                                                                                                                                                                                                        |                                                   |
| Holland, 2017 (26)             |                                                                                                          |                                              | P + E + S: 5.92 (1.72-27.98) <sup>C,D,F,O</sup><br>P + E + S: 3.33 (1.46-8) <sup>C,E,F,O</sup><br>P + E + S: 0.66 (0.25-1.59) <sup>C,D,G,O</sup><br>P + E + S: 0.93 (0.54-1.58) <sup>C,E,G,O</sup><br>P + E + S: 0.68 (0.25-1.72) <sup>C,D,H,O</sup><br>P + E + S: 0.87 (0.44-1.68) <sup>C,E,H,O</sup> |                                                   |
| Hasselmann, 2016 (34)          |                                                                                                          |                                              |                                                                                                                                                                                                                                                                                                        |                                                   |
| Islam, 2016 (26)               |                                                                                                          |                                              |                                                                                                                                                                                                                                                                                                        |                                                   |
| Sørnbø, 2015 (35)              | P: 0.96 (0.73-1.25) <sup>M</sup><br>E: 1.28 (1.18-1.39) <sup>M</sup><br>S: 0.94 (0.76-1.16) <sup>M</sup> |                                              | P + E + S: 1.47 (1.23-1.76) <sup>M</sup><br>P + E: 1.39 (1.18-1.39) <sup>M</sup><br>P + S: 0.95 (0.61-1.47) <sup>M</sup><br>S + E: 1.27 (1.02-1.58) <sup>M</sup>                                                                                                                                       |                                                   |
| James, 2014 (27)               |                                                                                                          |                                              | P + E + S: 1.25 (0.85-1.84) <sup>I,J</sup><br>P + E + S: 1.01 (0.8-1.29) <sup>I,K</sup>                                                                                                                                                                                                                |                                                   |
| Moraes, 2011 (28)              |                                                                                                          |                                              |                                                                                                                                                                                                                                                                                                        |                                                   |
| Shroff, 2011 (29)              |                                                                                                          |                                              |                                                                                                                                                                                                                                                                                                        |                                                   |
| Lau, 2007 (30)                 |                                                                                                          |                                              |                                                                                                                                                                                                                                                                                                        |                                                   |
| Silverman, 2006 (31)           |                                                                                                          |                                              | P + E: 0.94 (0.76-1.7) <sup>D</sup>                                                                                                                                                                                                                                                                    | P + E: 0.97 (0.72-1.3) <sup>D</sup>               |
|                                |                                                                                                          |                                              | P + E: 1.05 (0.86-1.3) <sup>D</sup>                                                                                                                                                                                                                                                                    |                                                   |

\* IPV measured as physical (P), or emotional (E) or sexual (S)

\*\* IPV measured as physical (P), emotional/psychological/mental (M) and sexual (S) combined

<sup>A</sup> Crude OR (measured as effect of IPV exposure the past year and interpreted as lower likelihood of continuing BF at 6 weeks)

<sup>B</sup> At least one month of BF

<sup>C</sup> HR interpreted as the probability of stopping BF

<sup>D</sup> Duration at 4 weeks

<sup>E</sup> Duration at 13 weeks

<sup>F</sup> White women

<sup>G</sup> Black women

<sup>H</sup> Hispanic women

<sup>I</sup> Interpreted as likelihood of BF at the time measured

<sup>J</sup> BF at 3 months

<sup>K</sup> BF at 6 months

1  
2  
3  
4 L BF at 1-8 weeks

5 M BF < 4 weeks

6 o Interview of participants included items about the pregnancy, prenatal and postpartum period  
7  
8  
9  
10  
11  
12  
13  
14  
15  
16  
17  
18  
19  
20  
21  
22  
23  
24  
25  
26  
27  
28  
29  
30  
31  
32  
33  
34  
35  
36  
37  
38  
39  
40  
41  
42  
43  
44  
45  
46  
47  
48  
49  
50  
51  
52  
53  
54  
55  
56  
57  
58  
59  
60

For peer review only

**Table S2.4: Initiation of breastfeeding (aOR; 95% CI) vs. no initiation of breastfeeding**

| Reference                         | Exposed to IPV*<br>prior to<br>pregnancy                             | Exposed to IPV*<br>during<br>pregnancy/post-<br>partum       | Exposed to any IPV**<br>prior to pregnancy                                                                                    | Exposed to any IPV** during<br>pregnancy/post-partum |
|-----------------------------------|----------------------------------------------------------------------|--------------------------------------------------------------|-------------------------------------------------------------------------------------------------------------------------------|------------------------------------------------------|
| Madsen, 2019 (32)                 |                                                                      |                                                              |                                                                                                                               |                                                      |
| Martin-de-las-Heras,<br>2018 (33) |                                                                      | E: 2 (1.2-3.3) <sub>B</sub><br>P: 0.9 (0.3-2.6) <sub>B</sub> |                                                                                                                               |                                                      |
| Miller-Graff, 2018 (20)           | P + E + S: 0.62 (0.06-6.7) <sub>A</sub>                              |                                                              |                                                                                                                               |                                                      |
| Tiwari, 2018 (21)                 |                                                                      |                                                              |                                                                                                                               |                                                      |
| Wallenborn, 2018 (22)             | P: 1.05 (0.9-1.23)                                                   | P: 0.9 (0.73-1.11)                                           |                                                                                                                               |                                                      |
|                                   | P: 0.98 (0.84-1.13)                                                  |                                                              |                                                                                                                               |                                                      |
| Boyce, 2017 (23)                  | P: 0.81 (0.71-0.93) <sub>C</sub><br>S: 0.52 (0.36-0.76) <sub>C</sub> |                                                              | P + S: 0.83 (0.67-1.01) <sub>C</sub>                                                                                          |                                                      |
| Finnbogadottir, 2017 (24)         |                                                                      |                                                              |                                                                                                                               |                                                      |
| Holland, 2017 (25)                |                                                                      |                                                              | P + E + S: 2.3 (0.7-7.2) <sub>D,E</sub><br>P + E + S: 1.8 (0.9-3.9) <sub>D,F</sub><br>P + E + S: 0.9 (0.2-3.8) <sub>D,G</sub> |                                                      |
| Hasselmann, 2016 (34)             |                                                                      |                                                              |                                                                                                                               |                                                      |
| Islam, 2016 (26)                  |                                                                      |                                                              |                                                                                                                               |                                                      |
| Sørbo, 2015 (35)                  |                                                                      |                                                              |                                                                                                                               |                                                      |
| James, 2014 (27)                  |                                                                      |                                                              |                                                                                                                               |                                                      |
| Moraes, 2011 (28)                 |                                                                      |                                                              |                                                                                                                               |                                                      |
| Shroff, 2011 (29)                 |                                                                      |                                                              |                                                                                                                               |                                                      |
| Lau, 2007 (30)                    |                                                                      |                                                              |                                                                                                                               |                                                      |
| Silverman, 2006 (31)              |                                                                      |                                                              | P + E: 0.95 (0.81-1.1)                                                                                                        | P + E: 0.86 (0.69-1.06)                              |
|                                   | P + E: 0.87 (0.76-1.01)                                              |                                                              |                                                                                                                               |                                                      |

\* IPV measured as physical (P), or emotional (E) or sexual (S)

\*\* IPV measured as physical (P), emotional/psychological/mental (M) and sexual (S) combined

A Participants were interviewed during pregnancy and again approximately 6 weeks postpartum. Results do not distinguish between violence before and after pregnancy

B Measured as BF avoidance

C Lifetime IPV interpreted as lower odds of early initiation of BF

D Measured as OR

E White women

F Black women

G Hispanic women

**Table S2.5: Early termination of exclusive breastfeeding (aOR; 95% CI) vs. no termination of exclusive breastfeeding**

| Reference                      | Exposed to IPV* prior to pregnancy                                   | Exposed to IPV* during pregnancy/post-partum                                            | Exposed to any IPV** prior to pregnancy                                                                                                                                                                                                                                                                               | Exposed to any IPV** during pregnancy/post-partum                                    |
|--------------------------------|----------------------------------------------------------------------|-----------------------------------------------------------------------------------------|-----------------------------------------------------------------------------------------------------------------------------------------------------------------------------------------------------------------------------------------------------------------------------------------------------------------------|--------------------------------------------------------------------------------------|
| Madsen, 2019 (32)              | P: 1.53 (1.01-23.1)<br>E: 1.61 (1.26-2.07)<br>S: 1.5 (1.07-2.09)     | P: 1.68 (1-2.82)<br>E: 1.23 (0.91-1.65)<br>S: 1.35 (0.96-1.91)                          | P + E + S: 1.93 (1.11-3.34)                                                                                                                                                                                                                                                                                           | P + E + S: 2.87 (1.27-6.46)                                                          |
| Martin-de-las-Heras, 2018 (33) |                                                                      |                                                                                         |                                                                                                                                                                                                                                                                                                                       |                                                                                      |
| Miller-Graff, 2018 (20)        |                                                                      |                                                                                         | P + E + S: 0.41 <sub>A</sub> (0.11-1.45)                                                                                                                                                                                                                                                                              |                                                                                      |
| Tiwari, 2018 (21)              |                                                                      |                                                                                         |                                                                                                                                                                                                                                                                                                                       |                                                                                      |
| Wallenborn, 2018 (22)          |                                                                      |                                                                                         |                                                                                                                                                                                                                                                                                                                       |                                                                                      |
| Boyce, 2017 (23)               | P: 0.83 (0.71-0.96) <sub>B</sub><br>S: 0.74 (0.49-1.12) <sub>B</sub> |                                                                                         | P + S: 0.92 (0.75-1.15) <sub>B</sub>                                                                                                                                                                                                                                                                                  |                                                                                      |
| Finnbogadottir, 2017 (24)      |                                                                      |                                                                                         | P + E + S: 5.7515 (0.229-144.4791) <sub>N,T</sub><br>P + E + S: 1.7305 (0.4944-6.0564) <sub>O,T</sub><br>P + E + S: 0.7756 (0.2616-2.9999) <sub>P,T</sub><br>P + E + S: 0.5204 (0.2158-1.2548) <sub>Q,T</sub><br>P + E + S: 0.5442 (0.2224-1.3319) <sub>R,T</sub><br>P + E + S: 0.5792 (0.1655-2.0271) <sub>S,T</sub> |                                                                                      |
| Holland, 2017 (25)             |                                                                      |                                                                                         | P + E + S: 1.73 (0.97-3.11) <sub>I,K</sub><br>P + E + S: 1.65 (0.95-2.86) <sub>J,K</sub><br>P + E + S: 0.95 (0.63-1.43) <sub>L</sub><br>P + E + S: 0.97 (0.67-1.39) <sub>L</sub><br>P + E + S: 0.71 (0.41-1.19) <sub>L,M</sub><br>P + E + S: 0.83 (0.50-1.35) <sub>L,M</sub>                                          |                                                                                      |
| Hasselmann, 2016 (34)          |                                                                      |                                                                                         |                                                                                                                                                                                                                                                                                                                       | P + E + S: 1.35 (1.07-1.71) <sub>G</sub><br>P + E + S: 1.56 (1.16-1.95) <sub>H</sub> |
| Islam, 2016 (26)               |                                                                      | P: 0.17 (0.07-0.4) <sub>C</sub><br>E: 0.51 (0.26-1) <sub>D</sub><br>S: 0.43 (0.18-1.06) |                                                                                                                                                                                                                                                                                                                       |                                                                                      |
| Sørbo, 2015 (35)               |                                                                      |                                                                                         |                                                                                                                                                                                                                                                                                                                       |                                                                                      |
| James, 2014 (27)               |                                                                      |                                                                                         |                                                                                                                                                                                                                                                                                                                       |                                                                                      |
| Moraes, 2011 (28)              |                                                                      | P: 1.17 (0.89-1.53) <sub>E</sub>                                                        |                                                                                                                                                                                                                                                                                                                       |                                                                                      |
| Shroff, 2011 (29)              | P: 0.69 (0.42-1.11)                                                  |                                                                                         |                                                                                                                                                                                                                                                                                                                       |                                                                                      |
| Lau, 2007 (30)                 |                                                                      |                                                                                         |                                                                                                                                                                                                                                                                                                                       | P + E + S: 1.839 (1.61-2.911) <sub>F</sub>                                           |
| Silverman, 2006 (31)           |                                                                      |                                                                                         |                                                                                                                                                                                                                                                                                                                       |                                                                                      |

\* IPV measured as physical (P), or emotional (E) or sexual (S)

\*\* IPV measured as physical (P), emotional/psychological/mental (M) and sexual (S) combined

A Measured as crude OR and interpreted as lower likelihood of EBF

B Lifetime IPV and interpreted as lower odds of EBF

C Interpreted as 83 % greater risk of discontinuing EBF

D Interpreted as 49 % less likely to exclusively breastfeed

E Measured as HR and interpreted as probability of early cessation of EBF

F Measured as experience of 'no IPV' and interpreted as more likely to breastfeed

G IPV until 3<sup>rd</sup> month postpartum measured as RR

H IPV in the 3<sup>rd</sup> month postpartum measured as RR

I EBF at 4 weeks postpartum

J EBF at 14 weeks postpartum

K White women

L Black women

M Hispanic women

1  
2  
3  
4  
5  
6  
7  
8  
9  
10  
11  
12  
13  
14  
15  
16  
17  
18  
19  
20  
21  
22  
23  
24  
25  
26  
27  
28  
29  
30  
31  
32  
33  
34  
35  
36  
37  
38  
39  
40  
41  
42  
43  
44  
45  
46  
47  
48  
49  
50  
51  
52  
53  
54  
55  
56  
57  
58  
59  
60

- N EBF at 1 month
- O EBF at 2 months
- P EBF at 4 months
- Q EBF at 6 months
- R EBF at 9 months
- S EBF at 12 months
- T OR measured at: [https://www.medcalc.org/calc/odds\\_ratio.php](https://www.medcalc.org/calc/odds_ratio.php)

For peer review only



# PRISMA 2009 Checklist

1  
2  
3  
4  
5  
6  
7  
8  
9  
10  
11  
12  
13  
14  
15  
16  
17  
18  
19  
20  
21  
22  
23  
24  
25  
26  
27  
28  
29  
30  
31  
32  
33  
34  
35  
36  
37  
38  
39  
40  
41  
42  
43  
44  
45  
46  
47

| Section/topic                      | #  | Checklist item                                                                                                                                                                                                                                                                                              | Reported on page # |
|------------------------------------|----|-------------------------------------------------------------------------------------------------------------------------------------------------------------------------------------------------------------------------------------------------------------------------------------------------------------|--------------------|
| <b>TITLE</b>                       |    |                                                                                                                                                                                                                                                                                                             |                    |
| Title                              | 1  | Identify the report as a systematic review, meta-analysis, or both.                                                                                                                                                                                                                                         | 1                  |
| <b>ABSTRACT</b>                    |    |                                                                                                                                                                                                                                                                                                             |                    |
| Structured summary                 | 2  | Provide a structured summary including, as applicable: background; objectives; data sources; study eligibility criteria, participants, and interventions; study appraisal and synthesis methods; results; limitations; conclusions and implications of key findings; systematic review registration number. | 2                  |
| <b>INTRODUCTION</b>                |    |                                                                                                                                                                                                                                                                                                             |                    |
| Rationale                          | 3  | Describe the rationale for the review in the context of what is already known.                                                                                                                                                                                                                              | 2-3                |
| Objectives                         | 4  | Provide an explicit statement of questions being addressed with reference to participants, interventions, comparisons, outcomes, and study design (PICOS).                                                                                                                                                  | 2-3                |
| <b>METHODS</b>                     |    |                                                                                                                                                                                                                                                                                                             |                    |
| Protocol and registration          | 5  | Indicate if a review protocol exists, if and where it can be accessed (e.g., Web address), and, if available, provide registration information including registration number.                                                                                                                               | 3                  |
| Eligibility criteria               | 6  | Specify study characteristics (e.g., PICOS, length of follow-up) and report characteristics (e.g., years considered, language, publication status) used as criteria for eligibility, giving rationale.                                                                                                      | 3                  |
| Information sources                | 7  | Describe all information sources (e.g., databases with dates of coverage, contact with study authors to identify additional studies) in the search and date last searched.                                                                                                                                  | 3                  |
| Search                             | 8  | Present full electronic search strategy for at least one database, including any limits used, such that it could be repeated.                                                                                                                                                                               | 3 + appendix       |
| Study selection                    | 9  | State the process for selecting studies (i.e., screening, eligibility, included in systematic review, and, if applicable, included in the meta-analysis).                                                                                                                                                   | 3-4                |
| Data collection process            | 10 | Describe method of data extraction from reports (e.g., piloted forms, independently, in duplicate) and any processes for obtaining and confirming data from investigators.                                                                                                                                  | NA                 |
| Data items                         | 11 | List and define all variables for which data were sought (e.g., PICOS, funding sources) and any assumptions and simplifications made.                                                                                                                                                                       | NA                 |
| Risk of bias in individual studies | 12 | Describe methods used for assessing risk of bias of individual studies (including specification of whether this was done at the study or outcome level), and how this information is to be used in any data synthesis.                                                                                      | 4                  |
| Summary measures                   | 13 | State the principal summary measures (e.g., risk ratio, difference in means).                                                                                                                                                                                                                               | NA                 |
| Synthesis of results               | 14 | Describe the methods of handling data and combining results of studies, if done, including measures of consistency (e.g., I <sup>2</sup> ) for each meta-analysis.                                                                                                                                          | NA                 |



# PRISMA 2009 Checklist

Page 1 of 2

| Section/topic                 | #  | Checklist item                                                                                                                                                                                           | Reported on page # |
|-------------------------------|----|----------------------------------------------------------------------------------------------------------------------------------------------------------------------------------------------------------|--------------------|
| Risk of bias across studies   | 15 | Specify any assessment of risk of bias that may affect the cumulative evidence (e.g., publication bias, selective reporting within studies).                                                             | 4                  |
| Additional analyses           | 16 | Describe methods of additional analyses (e.g., sensitivity or subgroup analyses, meta-regression), if done, indicating which were pre-specified.                                                         | NA                 |
| <b>RESULTS</b>                |    |                                                                                                                                                                                                          |                    |
| Study selection               | 17 | Give numbers of studies screened, assessed for eligibility, and included in the review, with reasons for exclusions at each stage, ideally with a flow diagram.                                          | 5                  |
| Study characteristics         | 18 | For each study, present characteristics for which data were extracted (e.g., study size, PICOS, follow-up period) and provide the citations.                                                             | 5                  |
| Risk of bias within studies   | 19 | Present data on risk of bias of each study and, if available, any outcome level assessment (see item 12).                                                                                                | 5                  |
| Results of individual studies | 20 | For all outcomes considered (benefits or harms), present, for each study: (a) simple summary data for each intervention group (b) effect estimates and confidence intervals, ideally with a forest plot. | 6                  |
| Synthesis of results          | 21 | Present results of each meta-analysis done, including confidence intervals and measures of consistency.                                                                                                  | NA                 |
| Risk of bias across studies   | 22 | Present results of any assessment of risk of bias across studies (see Item 15).                                                                                                                          | NA                 |
| Additional analysis           | 23 | Give results of additional analyses, if done (e.g., sensitivity or subgroup analyses, meta-regression [see Item 16]).                                                                                    | NA                 |
| <b>DISCUSSION</b>             |    |                                                                                                                                                                                                          |                    |
| Summary of evidence           | 24 | Summarize the main findings including the strength of evidence for each main outcome; consider their relevance to key groups (e.g., healthcare providers, users, and policy makers).                     | 6                  |
| Limitations                   | 25 | Discuss limitations at study and outcome level (e.g., risk of bias), and at review-level (e.g., incomplete retrieval of identified research, reporting bias).                                            | 6-7                |
| Conclusions                   | 26 | Provide a general interpretation of the results in the context of other evidence, and implications for future research.                                                                                  | 8                  |
| <b>FUNDING</b>                |    |                                                                                                                                                                                                          |                    |
| Funding                       | 27 | Describe sources of funding for the systematic review and other support (e.g., supply of data); role of funders for the systematic review.                                                               | 8                  |

From: Moher D, Liberati A, Tetzlaff J, Altman DG, The PRISMA Group (2009). Preferred Reporting Items for Systematic Reviews and Meta-Analyses: The PRISMA Statement. PLoS Med 6(7): e1000097. doi:10.1371/journal.pmed1000097

For more information, visit: [www.prisma-statement.org](http://www.prisma-statement.org).

Page 2 of 2

For peer review only - <http://bmjopen.bmj.com/site/about/guidelines.xhtml>
