# Supplementary material for: Intimate partner violence and breastfeeding: a systematic review
Source: PubMed Central journal article supplement — BMJ Open. 2020 Oct 31;10(10):e034153. doi: 10.1136/bmjopen-2019-034153 (PMC7783610; doi:10.1136/bmjopen-2019-034153), 2020-10-31
Supplement: bmjopen-2019-034153supp001.pdf [file bmjopen-2019-034153supp001.pdf]

**Appendix, S1: Search strategy****Embase search: Searched on the 11<sup>th</sup> of March with a total result of 1382 articles**

| #ID | Search                                                                                                                                                                                                                             |
|-----|------------------------------------------------------------------------------------------------------------------------------------------------------------------------------------------------------------------------------------|
| 1   | Exp partner violence/                                                                                                                                                                                                              |
| 2   | Exp domestic violence/                                                                                                                                                                                                             |
| 3   | Exp physical abuse/                                                                                                                                                                                                                |
| 4   | Exp battered woman/                                                                                                                                                                                                                |
| 5   | Exp breast feeding/                                                                                                                                                                                                                |
| 6   | Exp breast milk expression/                                                                                                                                                                                                        |
| 7   | Exp feeding behavior                                                                                                                                                                                                               |
| 8   | Exp lactation                                                                                                                                                                                                                      |
| 9   | Exp milk ejection                                                                                                                                                                                                                  |
| 10  | "intimate partner violence"                                                                                                                                                                                                        |
| 11  | "dating violence"                                                                                                                                                                                                                  |
| 12  | "partner violence"                                                                                                                                                                                                                 |
| 13  | "partner homicide"                                                                                                                                                                                                                 |
| 14  | "psychological violence"                                                                                                                                                                                                           |
| 15  | "psychological abuse"                                                                                                                                                                                                              |
| 16  | "spouse abuse"                                                                                                                                                                                                                     |
| 17  | "spousal abuse"                                                                                                                                                                                                                    |
| 18  | "wife abuse"                                                                                                                                                                                                                       |
| 19  | "partner abuse"                                                                                                                                                                                                                    |
| 20  | "domestic violence"                                                                                                                                                                                                                |
| 21  | "family violence"                                                                                                                                                                                                                  |
| 22  | "physical abuse"                                                                                                                                                                                                                   |
| 23  | "physical violence"                                                                                                                                                                                                                |
| 24  | "physical maltreatment"                                                                                                                                                                                                            |
| 25  | "sex offenses"                                                                                                                                                                                                                     |
| 26  | "sexual violence"                                                                                                                                                                                                                  |
| 27  | "sexual harm"                                                                                                                                                                                                                      |
| 28  | "sexual coercion"                                                                                                                                                                                                                  |
| 29  | "battered woman"                                                                                                                                                                                                                   |
| 30  | "battered women"                                                                                                                                                                                                                   |
| 31  | "abused women"                                                                                                                                                                                                                     |
| 32  | "abused woman"                                                                                                                                                                                                                     |
| 33  | "relationship violence"                                                                                                                                                                                                            |
| 34  | "relationship aggression"                                                                                                                                                                                                          |
| 35  | "couple violence"                                                                                                                                                                                                                  |
| 36  | "spousal violence"                                                                                                                                                                                                                 |
| 37  | "domestic abuse"                                                                                                                                                                                                                   |
| 38  | "wife beating"                                                                                                                                                                                                                     |
| 39  | "physical harm"                                                                                                                                                                                                                    |
| 40  | "physical aggression"                                                                                                                                                                                                              |
| 41  | "emotional violence"                                                                                                                                                                                                               |
| 42  | "emotional abuse"                                                                                                                                                                                                                  |
| 43  | "emotional harm"                                                                                                                                                                                                                   |
| 44  | "violence against women"                                                                                                                                                                                                           |
| 45  | 1 or 2 or 3 or 4 or 10 or 11 or 12 or 13 or 14 or 15 or 16 or 17 or 18 or 19 or 20 or 21 or 22 or 23 or 24 or 25 or 26 or 27 or 28 or 29 or 30 or 31 or 32 or 33 or 34 or 35 or 36 or 37 or 38 or 39 or 40 or 41 or 42 or 43 or 44 |
| 46  | Exp sexual abuse                                                                                                                                                                                                                   |
| 47  | Controlling behavior                                                                                                                                                                                                               |
| 48  | 45 or 46 or 47                                                                                                                                                                                                                     |
| 49  | "sexual abuse"                                                                                                                                                                                                                     |
| 50  | 48 or 49                                                                                                                                                                                                                           |
| 51  | "exclusive breastfeeding"                                                                                                                                                                                                          |
| 52  | "breastfeeding duration"                                                                                                                                                                                                           |
| 53  | "breastfeeding intention"                                                                                                                                                                                                          |
| 54  | "pumping breast"                                                                                                                                                                                                                   |
| 55  | "human milk"                                                                                                                                                                                                                       |
| 56  | "breast milk"                                                                                                                                                                                                                      |
| 57  | "milk secretion"                                                                                                                                                                                                                   |
| 58  | "milk let-down"                                                                                                                                                                                                                    |
| 59  | 5 or 6 or 7 or 8 or 51 or 52 or 53 or 54 or 55 or 57 or 58                                                                                                                                                                         |
| 60  | Feeding behavior                                                                                                                                                                                                                   |
| 61  | Feeding pattern                                                                                                                                                                                                                    |
| 62  | "feeding patterns"                                                                                                                                                                                                                 |

|    |                                                                      |
|----|----------------------------------------------------------------------|
| 63 | 59 or 60 or 61 or 62                                                 |
| 64 | Feeding behaviors                                                    |
| 65 | 63 or 64                                                             |
| 66 | "exclusive breast feeding"                                           |
| 67 | "exclusive breast feedings"                                          |
| 68 | "breast feedings"                                                    |
| 69 | "breast feeding"                                                     |
| 70 | "breastmilk expression"                                              |
| 71 | "breastmilk expressions"                                             |
| 72 | "milk collection"                                                    |
| 73 | "milk collections"                                                   |
| 74 | "breast pumping"                                                     |
| 75 | "milk secretion"                                                     |
| 76 | "milk secretions"                                                    |
| 77 | 65 or 66 or 67 or 68 or 69 or 70 or 71 or 72 or 73 or 74 or 75 or 76 |
| 78 | Lactations                                                           |
| 79 | Lactation                                                            |
| 80 | 77 or 78 or 79                                                       |
| 81 | 50 and 80                                                            |

### Global Health Library search: Searched on the 12<sup>th</sup> of March with a total result of 91 articles

| #ID | Search                                                                                                                                                                            |
|-----|-----------------------------------------------------------------------------------------------------------------------------------------------------------------------------------|
| S1  | "intimate partner violence" OR "dating violence" OR "partner violence" OR "partner homicide" OR "psychological abuse" OR "psychological violence"                                 |
| S2  | "spouse abuse" OR "spousal abuse" OR "wife abuse" OR "partner abuse"                                                                                                              |
| S3  | S3 OR S2                                                                                                                                                                          |
| S4  | "domestic violence" OR "family violence"                                                                                                                                          |
| S5  | S4 OR S3                                                                                                                                                                          |
| S6  | "physical abuse" OR "physical violence" OR "physical maltreatment"                                                                                                                |
| S7  | S6 OR S5                                                                                                                                                                          |
| S8  | "sexual assault" OR "sex offenses" OR "sexual violence" OR "sexual abuse" OR "sexual harm" OR "sexual coercion"                                                                   |
| S9  | S8 OR S7                                                                                                                                                                          |
| S10 | "battered woman" OR "battered women" OR "abused woman" OR "abused women"                                                                                                          |
| S11 | S10 OR S9                                                                                                                                                                         |
| S12 | "relationship violence" OR "relationship aggression" OR "couple violence" OR "spousal violence" OR "domestic abuse" OR "wife beating" OR "physical harm" OR "physical aggression" |
| S13 | S12 OR S11                                                                                                                                                                        |
| S14 | "emotional violence" OR "emotional abuse" OR "emotional harm" OR "controlling behaviour" OR "violence against women"                                                              |
| S15 | S14 OR S13                                                                                                                                                                        |
| S16 | "breast feeding" OR "breastfeeding" OR "exclusive breast feeding" OR "exclusive breastfeeding" OR "breastfeeding duration" OR "breastfeeding intention"                           |
| S17 | "breast milk expression" OR "breast milk expressions" OR "milk collection" OR "milk collections" OR "breast pumping" OR "pumping breast"                                          |
| S18 | S17 OR S16                                                                                                                                                                        |
| S19 | "feeding behaviour" OR "feeding behaviors" OR "feeding pattern" OR "feeding patterns" OR "human milk" OR "milk, human"                                                            |
| S20 | S19 OR S18                                                                                                                                                                        |
| S21 | Lactation OR lactations OR "milk secretion" OR "milk secretions" OR "milk ejection" OR "milk let-down"                                                                            |
| S22 | S21 OR S20                                                                                                                                                                        |
| S23 | S22 AND S15                                                                                                                                                                       |

### PubMed search: Searched on the 8<sup>th</sup> of March with a total result of 253 articles

((((((((((("Breast Feeding"[Mesh]) OR breastfeeding) OR exclusive breast fe\*) OR "exclusive breastfeeding") OR "breastfeeding duration") OR breast fe\*) OR "breastfeeding intention")) OR (((("Breast Milk Expression"[Mesh]) OR breast milk expression\*) OR breastmilk expression\*) OR milk collection\*) OR breast pumping\*) OR "pumping breast")) OR (((("Feeding Behavior"[Mesh]) OR feeding behavior\*) OR feeding pattern\*)) OR (("Milk, Human"[Mesh]) OR "human milk")) OR (((("Lactation"[Mesh]) OR milk secretion\*) OR lactation\*)) OR (("Milk Ejection"[Mesh]) OR "milk let-down")) AND (((((((((((("relationship violence") OR "relationship aggression") OR "couple violence") OR "spousal violence") OR "domestic abuse") OR "wife beating") OR "physical harm") OR "physical aggression") OR "emotional violence") OR "emotional abuse") OR "emotional harm") OR controlling behavior\*) OR "violence against women")) OR (((("Battered Women"[Mesh]) OR "Battered Woman") OR "abused women") OR "abused woman")) OR (((("Sex Offenses"[Mesh]) OR "sex offenses") OR "sexual violence") OR sexual abuse\*) OR "sexual harm") OR "sexual coercion")) OR (((("Physical Abuse"[Mesh]) OR "physical abuse") OR "physical violence") OR "physical maltreatment")) OR (((("Domestic Violence"[Mesh]) OR "domestic violence") OR "family violence")) OR (((("Spouse

Abuse"[Mesh]) OR "spouse abuse") OR "spousal abuse") OR "wife abuse") OR "partner abuse") OR ((((((("Intimate Partner Violence"[Mesh]) OR "intimate partner violence") OR "dating violence") OR "partner violence") OR "partner homicide") OR "psychological violence") OR "psychological abuse"))

**SCOPUS: Searched on the 11<sup>th</sup> of March with a total result of 257 articles**

(((((TITLE-ABS-KEY("breast feeding")) OR (TITLE-ABS-KEY("breastfeeding intention")))) OR ((TITLE-ABS-KEY(breastfeeding)) OR (TITLE-ABS-KEY("breastfeeding duration" ))) OR ((TITLE-ABS-KEY("exclusive breast feeding" )) OR (TITLE-ABS-KEY("exclusive breastfeeding" ))) OR ((TITLE-ABS-KEY("breast milk expression")) OR (TITLE-ABS-KEY("breast milk expressions" )) OR (TITLE-ABS-KEY("breastmilk expression" )) OR (TITLE-ABS-KEY("breastmilk expressions")) OR (TITLE-ABS-KEY("milk collections" )) OR (TITLE-ABS-KEY("milk collection")) OR (TITLE-ABS-KEY("breast pumping" )) OR (TITLE-ABS-KEY("pumping breast")) OR ((TITLE-ABS-KEY("feeding behavior" )) OR (TITLE-ABS-KEY("feeding pattern")) OR (TITLE-ABS-KEY("human milk" )) OR (TITLE-ABS-KEY("milk, human")) OR (TITLE-ABS-KEY("breast milk")) OR ((TITLE-ABS-KEY(lactation)) OR (TITLE-ABS-KEY("milk secretion" )) OR (TITLE-ABS-KEY("milk ejection")) OR (TITLE-ABS-KEY("milk let-down")))) AND (((TITLE-ABS-KEY("intimate partner violence")) OR (TITLE-ABS-KEY("dating violence" )) OR (TITLE-ABS-KEY("partner violence" )) OR (TITLE-ABS-KEY("partner homicide")) OR (TITLE-ABS-KEY("psychological violence" )) OR (TITLE-ABS-KEY("psychological abuse" ))) OR (((TITLE-ABS-KEY("spouse abuse")) OR (TITLE-ABS-KEY("spousal abuse" ))) OR (TITLE-ABS-KEY("wife abuse" )) OR (TITLE-ABS-KEY("partner abuse" ))) OR ((TITLE-ABS-KEY("domestic violence" )) OR (TITLE-ABS-KEY("family violence" )) OR (TITLE-ABS-KEY("physical abuse" )) OR (TITLE-ABS-KEY("physical violence" )) OR (TITLE-ABS-KEY("physical maltreatment")) OR ((TITLE-ABS-KEY("sex offenses" )) OR (TITLE-ABS-KEY("sexual violence")) OR (TITLE-ABS-KEY("sexual abuse")) (TITLE-ABS-KEY("sexual harm" )) OR (TITLE-ABS-KEY("sexual coercion" ))) OR (((TITLE-ABS-KEY("battered women" )) OR (TITLE-ABS-KEY("battered woman")) OR ((TITLE-ABS-KEY("abused woman" )) OR (TITLE-ABS-KEY("abused women")))) OR (((TITLE-ABS-KEY("relationship aggression")) OR (TITLE-ABS-KEY("couple violence" ))) OR (TITLE-ABS-KEY("relationship violence" ))) OR (TITLE-ABS-KEY("spousal violence")) OR ((TITLE-ABS-KEY("domestic violence" )) OR (TITLE-ABS-KEY("wife beating" )) OR (TITLE-ABS-KEY("physical harm" )) OR (TITLE-ABS-KEY("physical aggression" ))) OR ((TITLE-ABS-KEY("emotional violence" )) OR (TITLE-ABS-KEY("emotional abuse")) OR (TITLE-ABS-KEY("emotional harm")) OR (TITLE-ABS-KEY("controlling behavior" ))) OR (TITLE-ABS-KEY("violence against women" )))

## Appendix, S2: Data synthesis tables

Table S2.1: Results of NOS quality assessment

| Cohort studies                    |                                          |                                     |                           |                                                                          |                                                                                                                                    |                                               |                           |                                                 |                                  |              |                                        |
|-----------------------------------|------------------------------------------|-------------------------------------|---------------------------|--------------------------------------------------------------------------|------------------------------------------------------------------------------------------------------------------------------------|-----------------------------------------------|---------------------------|-------------------------------------------------|----------------------------------|--------------|----------------------------------------|
| Study                             | Selection (maximum 4 stars)              |                                     |                           |                                                                          | Comparability (maximum 2 stars)                                                                                                    |                                               | Outcome (maximum 3 stars) |                                                 |                                  | No. of stars | No. of stars with domains adjusted for |
|                                   | Representativeness of the exposed cohort | Selection of the non-exposed cohort | Ascertainment of exposure | Demonstration that outcome of interest was not present at start of study | Comparability of cohorts on the basis of the design or analysis                                                                    | Confounding domains adjusted for (table S2.1) | Assessment of outcome     | Was follow-up long enough for outcomes to occur | Adequacy of follow up of cohorts |              |                                        |
| Madsen, 2019                      | *                                        | *                                   | *                         | *                                                                        | **                                                                                                                                 | **                                            | -                         | *                                               | *                                | 8            | 10                                     |
| Martin-de-las-heras, 2018         | *                                        | *                                   | *                         | *                                                                        | **                                                                                                                                 | *****                                         | -                         | -                                               | -                                | 6            | 12                                     |
| Miller-Graff, 2018                | -                                        | *                                   | *                         | *                                                                        | **                                                                                                                                 | ****                                          | -                         | *                                               | *                                | 7            | 11                                     |
| Finnbogadottir, 2017 <sup>A</sup> | *                                        | *                                   | -                         | *                                                                        | -                                                                                                                                  | -                                             | -                         | *                                               | -                                | 4            | 4                                      |
| Hasselmann, 2016                  | *                                        | *                                   | *                         | -                                                                        | -                                                                                                                                  | ***                                           | -                         | *                                               | -                                | 4            | 7                                      |
| Sørbo, 2015                       | *                                        | *                                   | -                         | *                                                                        | **                                                                                                                                 | ***                                           | -                         | *                                               | -                                | 6            | 9                                      |
| Cross-sectional studies           |                                          |                                     |                           |                                                                          |                                                                                                                                    |                                               |                           |                                                 |                                  |              |                                        |
| Study                             | Selection (maximum 5 stars)              |                                     |                           |                                                                          | Comparability (maximum 2 stars)                                                                                                    |                                               | Outcome (maximum 3 stars) |                                                 | No. of stars                     |              |                                        |
|                                   | Representativeness of the sample         | Sample size                         | Non-respondents           | Ascertainment of the exposure (risk factor)                              | The subjects in different outcome groups are comparable, based on the study design or analysis. Confounding factors are controlled | Confounding domains adjusted for (table S2.1) | Assessment of outcome     | Statistical test                                |                                  |              |                                        |
| Tiwari, 2018                      | *                                        | *                                   | *                         | **                                                                       | *                                                                                                                                  | ****                                          | *                         | *                                               | 8                                | 12           |                                        |
| Wallenborn, 2018                  | *                                        | *                                   | -                         | **                                                                       | *                                                                                                                                  | *****                                         | *                         | *                                               | 7                                | 12           |                                        |
| Boyce, 2017                       | *                                        | *                                   | *                         | **                                                                       | -                                                                                                                                  | -                                             | *                         | *                                               | 7                                | 7            |                                        |
| Holland, 2017                     | -                                        | -                                   | -                         | *                                                                        | -                                                                                                                                  | ****                                          | *                         | *                                               | 3                                | 7            |                                        |
| Islam, 2016                       | *                                        | -                                   | *                         | *                                                                        | **                                                                                                                                 | *****<br>*                                    | *                         | *                                               | 7                                | 16           |                                        |
| James, 2014                       | -                                        | -                                   | -                         | **                                                                       | -                                                                                                                                  | ***                                           | *                         | *                                               | 4                                | 7            |                                        |

|                 |   |   |   |    |    |       |   |   |   |    |
|-----------------|---|---|---|----|----|-------|---|---|---|----|
| Moraes, 2011    | * | - | * | ** | ** | ****  | * | * | 8 | 12 |
| Shroff, 2011    | - | - | - | *  | -  | ***** | * | * | 3 | 8  |
| Lau, 2007       | * | * | * | ** | -  | ***** | * | * | 7 | 12 |
| Silverman, 2006 | * | * | * | *  | -  | ***   | * | * | 6 | 9  |

A Cross-sectional study embedded from a cohort. Analyzed with NOS for cohort.

Table S2.2: Confounders adjusted for in studies

| Reference                      | Domain  |                               |                                        |                            |                       |                              |                                     |                                   |                     |                    | Outcome                                  |
|--------------------------------|---------|-------------------------------|----------------------------------------|----------------------------|-----------------------|------------------------------|-------------------------------------|-----------------------------------|---------------------|--------------------|------------------------------------------|
|                                | Economy | Maternal lifestyle and health | Pregnancy/post partum related problems | Maternal socio-demographic | Child characteristics | Relationship characteristics | Support during pregnancy/postpartum | Violence or stressful life events | Pregnancy intention | Caste and religion |                                          |
| Madsen, 2019 (32)              |         | x                             |                                        | x                          |                       |                              |                                     |                                   |                     |                    | Premature termination of exclusive BF    |
| Martin-de-las-Heras, 2018 (33) |         | x                             | x                                      | x                          |                       | x                            | x                                   |                                   | x                   |                    | BF avoidance (initiation)                |
| Miller-Graff, 2018 (20)        | x       |                               | x                                      |                            |                       |                              | x                                   | x                                 |                     |                    | BF exclusivity, initiation and cessation |
| Tiwari, 2018 (21)              | x       |                               |                                        | x                          |                       | x                            |                                     | x                                 |                     | x                  | BF duration                              |
| Wallenborn, 2018 (22)          | x       |                               |                                        | x                          |                       | x                            |                                     | x                                 | x                   |                    | BF initiation and duration               |
| Boyce, 2017* (23)              |         |                               |                                        |                            |                       |                              |                                     |                                   |                     |                    | Early BF initiation and exclusivity      |
| Finnbogadottir, 2017 (24)      | NA      | NA                            | NA                                     | NA                         | NA                    | NA                           | NA                                  | NA                                | NA                  | NA                 | Exclusive BF                             |
| Holland, 2017 (25)             |         | x                             | x                                      | x                          |                       |                              |                                     | x                                 |                     |                    | BF initiation, duration and exclusivity  |
| Hasselmann, 2016 (34)          |         |                               |                                        | x                          | x                     | x                            |                                     |                                   |                     |                    | Interruption of exclusive BF             |
| Islam, 2016 (26)               | x       | x                             | x                                      | x                          | x                     | x                            | x                                   | x                                 | x                   |                    | Exclusive BF                             |
| Sørbø, 2015 (35)               |         |                               |                                        | x                          |                       | x                            |                                     | x                                 |                     |                    | Early cessation of any BF                |
| James, 2014 (27)               | x       |                               | x                                      | x                          |                       |                              |                                     |                                   |                     |                    | BF duration                              |
| Moraes, 2011 (28)              |         | x                             |                                        | x                          | x                     |                              | x                                   |                                   |                     |                    | Early cessation of exclusive BF          |
| Shroff, 2011 (29)              |         | x                             |                                        | x                          | x                     | x                            |                                     |                                   |                     | x                  | Exclusive BF                             |
| Lau, 2007 (30)                 |         | x                             | x                                      | x                          |                       | x                            |                                     |                                   | x                   |                    | Breastfeeding and mixed feeding          |
| Silverman, 2006 (31)           |         | x                             |                                        | x                          |                       | x                            |                                     |                                   |                     |                    | BF initiation and early cessation        |

\*Article states that the association between IPV and BF was adjusting for any covariate that were significant at  $p < 0,20$  levels in bivariate analysis, but results not shown

NA (not applicable)

#### Explanation of following groups of confounders:

Economy: Insurance and receipt of government assistance

Maternal lifestyle and health: Smoking, substance use prior to pregnancy, substance use all time, maternal health status, mothers BMI, HIV status

Pregnancy and postpartum related problems: Pregnancy health problems, preterm labor, mode of birth, complications during birth, mother/infant separation after birth, antenatal complications, postnatal complications, reasons for stopping BF and resuscitation

Maternal sociodemographic: Maternal age, maternal education, maternal race/ethnicity, first baby/number of the child, employment status, place of residence, parity, occupation, number of years lived in the U.S and language

Child characteristics: Gender of child, age of child, low birthweight/birth weight, child health

Relationship characteristics: Marital status, relationship characteristics, partner's education level, family structure, cohabitation

Support during pregnancy and postpartum: Prenatal BF education, number of antenatal care visits/health care services, kin support, social support, type of maternity clinic

Violence or stressful life events: Stressful live events 12 months before pregnancy, depression, childhood abuse, other forms of IPV

Pregnancy intention

Caste and religion

Table S2.3: Early cessation/shortened duration of breastfeeding (aOR; 95% CI) vs. no cessation of breastfeeding

| Reference                      | Exposed to IPV* prior to pregnancy                                                                       | Exposed to IPV* during pregnancy/post-partum | Exposed to any IPV** prior to pregnancy                                                                                                                                                                                                                                                                | Exposed to any IPV** during pregnancy/post-partum |
|--------------------------------|----------------------------------------------------------------------------------------------------------|----------------------------------------------|--------------------------------------------------------------------------------------------------------------------------------------------------------------------------------------------------------------------------------------------------------------------------------------------------------|---------------------------------------------------|
| Madsen, 2019 (32)              |                                                                                                          |                                              |                                                                                                                                                                                                                                                                                                        |                                                   |
| Martin-de-las-Heras, 2018 (33) |                                                                                                          |                                              |                                                                                                                                                                                                                                                                                                        |                                                   |
| Miller-Graff, 2018 (20)        | P + E + S: 0.22 (0.05-0.85) <sup>A</sup>                                                                 |                                              |                                                                                                                                                                                                                                                                                                        |                                                   |
| Tiwari, 2018 (21)              | E: 1.07 (0.81-1.41) <sup>B</sup>                                                                         |                                              |                                                                                                                                                                                                                                                                                                        |                                                   |
| Wallenborn, 2018 (22)          | P: 1.18 (1.01-1.37) <sup>L</sup>                                                                         | P: 1.15 (0.94-1.4) <sup>L</sup>              |                                                                                                                                                                                                                                                                                                        |                                                   |
|                                | P: 1.03 (0.89-1.19) <sup>L</sup>                                                                         |                                              |                                                                                                                                                                                                                                                                                                        |                                                   |
| Boyce, 2017 (23)               |                                                                                                          |                                              |                                                                                                                                                                                                                                                                                                        |                                                   |
| Finnbogadottir, 2017 (24)      |                                                                                                          |                                              |                                                                                                                                                                                                                                                                                                        |                                                   |
| Holland, 2017 (26)             |                                                                                                          |                                              | P + E + S: 5.92 (1.72-27.98) <sup>C,D,F,O</sup><br>P + E + S: 3.33 (1.46-8) <sup>C,E,F,O</sup><br>P + E + S: 0.66 (0.25-1.59) <sup>C,D,G,O</sup><br>P + E + S: 0.93 (0.54-1.58) <sup>C,E,G,O</sup><br>P + E + S: 0.68 (0.25-1.72) <sup>C,D,H,O</sup><br>P + E + S: 0.87 (0.44-1.68) <sup>C,E,H,O</sup> |                                                   |
| Hasselmann, 2016 (34)          |                                                                                                          |                                              |                                                                                                                                                                                                                                                                                                        |                                                   |
| Islam, 2016 (26)               |                                                                                                          |                                              |                                                                                                                                                                                                                                                                                                        |                                                   |
| Sørbo, 2015 (35)               | P: 0.96 (0.73-1.25) <sup>M</sup><br>E: 1.28 (1.18-1.39) <sup>M</sup><br>S: 0.94 (0.76-1.16) <sup>M</sup> |                                              | P + E + S: 1.47 (1.23-1.76) <sup>M</sup><br>P + E: 1.39 (1.18-1.39) <sup>M</sup><br>P + S: 0.95 (0.61-1.47) <sup>M</sup><br>S + E: 1.27 (1.02-1.58) <sup>M</sup>                                                                                                                                       |                                                   |
| James, 2014 (27)               | P + E + S: 1.25 (0.85-1.84) <sup>LJ</sup><br>P + E + S: 1.01 (0.8-1.29) <sup>LK</sup>                    |                                              |                                                                                                                                                                                                                                                                                                        |                                                   |
| Moraes, 2011 (28)              |                                                                                                          |                                              |                                                                                                                                                                                                                                                                                                        |                                                   |
| Shroff, 2011 (29)              |                                                                                                          |                                              |                                                                                                                                                                                                                                                                                                        |                                                   |
| Lau, 2007 (30)                 |                                                                                                          |                                              |                                                                                                                                                                                                                                                                                                        |                                                   |
| Silverman, 2006 (31)           |                                                                                                          |                                              | P + E: 0.94 (0.76-1.7) <sup>D</sup>                                                                                                                                                                                                                                                                    | P + E: 0.97 (0.72-1.3) <sup>D</sup>               |
|                                | P + E: 1.05 (0.86-1.3) <sup>D</sup>                                                                      |                                              |                                                                                                                                                                                                                                                                                                        |                                                   |

\* IPV measured as physical (P), or emotional (E) or sexual (S)

\*\* IPV measured as physical (P), emotional/psychological/mental (M) and sexual (S) combined

<sup>A</sup> Crude OR (measured as effect of IPV exposure the past year and interpreted as lower likelihood of continuing BF at 6 weeks)<sup>B</sup> At least one month of BF<sup>C</sup> HR interpreted as the probability of stopping BF<sup>D</sup> Duration at 4 weeks<sup>E</sup> Duration at 13 weeks<sup>F</sup> White women<sup>G</sup> Black women<sup>H</sup> Hispanic women<sup>I</sup> Interpreted as likelihood of BF at the time measured<sup>J</sup> BF at 3 months<sup>K</sup> BF at 6 months

L BF at 1-8 weeks

M BF < 4 weeks

o Interview of participants included items about the pregnancy, prenatal and postpartum period

Table S2.4: Initiation of breastfeeding (aOR; 95% CI) vs. no initiation of breastfeeding

| Reference                      | Exposed to IPV* prior to pregnancy                                   | Exposed to IPV* during pregnancy/post-partum                 | Exposed to any IPV** prior to pregnancy                                                                                       | Exposed to any IPV** during pregnancy/post-partum |
|--------------------------------|----------------------------------------------------------------------|--------------------------------------------------------------|-------------------------------------------------------------------------------------------------------------------------------|---------------------------------------------------|
| Madsen, 2019 (32)              |                                                                      |                                                              |                                                                                                                               |                                                   |
| Martin-de-las-Heras, 2018 (33) |                                                                      | E: 2 (1.2-3.3) <sub>B</sub><br>P: 0.9 (0.3-2.6) <sub>B</sub> |                                                                                                                               |                                                   |
| Miller-Graff, 2018 (20)        | P + E + S: 0.62 (0.06-6.7) <sub>A</sub>                              |                                                              |                                                                                                                               |                                                   |
| Tiwari, 2018 (21)              |                                                                      |                                                              |                                                                                                                               |                                                   |
| Wallenborn, 2018 (22)          | P: 1.05 (0.9-1.23)                                                   | P: 0.9 (0.7-1.11)                                            |                                                                                                                               |                                                   |
|                                | P: 0.98 (0.84-1.13)                                                  |                                                              |                                                                                                                               |                                                   |
| Boyce, 2017 (23)               | P: 0.81 (0.71-0.93) <sub>C</sub><br>S: 0.52 (0.36-0.76) <sub>C</sub> |                                                              | P + S: 0.83 (0.67-1.01) <sub>C</sub>                                                                                          |                                                   |
| Finnbogadottir, 2017 (24)      |                                                                      |                                                              |                                                                                                                               |                                                   |
| Holland, 2017 (25)             |                                                                      |                                                              | P + E + S: 2.3 (0.7-7.2) <sub>D,E</sub><br>P + E + S: 1.8 (0.9-3.9) <sub>D,F</sub><br>P + E + S: 0.9 (0.2-3.8) <sub>D,G</sub> |                                                   |
| Hasselmann, 2016 (34)          |                                                                      |                                                              |                                                                                                                               |                                                   |
| Islam, 2016 (26)               |                                                                      |                                                              |                                                                                                                               |                                                   |
| Sørbo, 2015 (35)               |                                                                      |                                                              |                                                                                                                               |                                                   |
| James, 2014 (27)               |                                                                      |                                                              |                                                                                                                               |                                                   |
| Moraes, 2011 (28)              |                                                                      |                                                              |                                                                                                                               |                                                   |
| Shroff, 2011 (29)              |                                                                      |                                                              |                                                                                                                               |                                                   |
| Lau, 2007 (30)                 |                                                                      |                                                              |                                                                                                                               |                                                   |
| Silverman, 2006 (31)           |                                                                      |                                                              | P + E: 0.95 (0.81-1.1)                                                                                                        | P + E: 0.86 (0.69-1.06)                           |
|                                |                                                                      |                                                              | P + E: 0.87 (0.76-1.01)                                                                                                       |                                                   |

\* IPV measured as physical (P), or emotional (E) or sexual (S)

\*\* IPV measured as physical (P), emotional/psychological/mental (M) and sexual (S) combined

<sub>A</sub> Participants were interviewed during pregnancy and again approximately 6 weeks postpartum. Results do not distinguish between violence before and after pregnancy

<sub>B</sub> Measured as BF avoidance

<sub>C</sub> Lifetime IPV interpreted as lower odds of early initiation of BF

<sub>D</sub> Measured as OR

<sub>E</sub> White women

<sub>F</sub> Black women

<sub>G</sub> Hispanic women

**Table S2.5: Early termination of exclusive breastfeeding (aOR; 95% CI) vs. no termination of exclusive breastfeeding**

| Reference                      | Exposed to IPV* prior to pregnancy                               | Exposed to IPV* during pregnancy/post-partum                                            | Exposed to any IPV** prior to pregnancy  | Exposed to any IPV** during pregnancy/post-partum                                                                                                                                                                                                                                                                     |
|--------------------------------|------------------------------------------------------------------|-----------------------------------------------------------------------------------------|------------------------------------------|-----------------------------------------------------------------------------------------------------------------------------------------------------------------------------------------------------------------------------------------------------------------------------------------------------------------------|
| Madsen, 2019 (32)              | P: 1.53 (1.01-23.1)<br>E: 1.61 (1.26-2.07)<br>S: 1.5 (1.07-2.09) | P: 1.68 (1-2.82)<br>E: 1.23 (0.91-1.65)<br>S: 1.35 (0.96-1.91)                          | P + E + S: 1.93 (1.11-3.34)              | P + E + S: 2.87 (1.27-6.46)                                                                                                                                                                                                                                                                                           |
| Martin-de-las-Heras, 2018 (33) |                                                                  |                                                                                         |                                          |                                                                                                                                                                                                                                                                                                                       |
| Miller-Graff, 2018 (20)        |                                                                  |                                                                                         | P + E + S: 0.41 <sup>A</sup> (0.11-1.45) |                                                                                                                                                                                                                                                                                                                       |
| Tiwari, 2018 (21)              |                                                                  |                                                                                         |                                          |                                                                                                                                                                                                                                                                                                                       |
| Wallenborn, 2018 (22)          |                                                                  |                                                                                         |                                          |                                                                                                                                                                                                                                                                                                                       |
| Boyce, 2017 (23)               |                                                                  | P: 0.83 (0.71-0.96) <sup>B</sup><br>S: 0.74 (0.49-1.12) <sup>B</sup>                    |                                          | P + S: 0.92 (0.75-1.15) <sup>B</sup>                                                                                                                                                                                                                                                                                  |
| Finnbogadottir, 2017 (24)      |                                                                  |                                                                                         |                                          | P + E + S: 5.7515 (0.229-144.4791) <sup>N,T</sup><br>P + E + S: 1.7305 (0.4944-6.0564) <sup>O,T</sup><br>P + E + S: 0.7756 (0.2616-2.9999) <sup>P,T</sup><br>P + E + S: 0.5204 (0.2158-1.2548) <sup>Q,T</sup><br>P + E + S: 0.5442 (0.2224-1.3319) <sup>R,T</sup><br>P + E + S: 0.5792 (0.1655-2.0271) <sup>S,T</sup> |
| Holland, 2017 (25)             |                                                                  |                                                                                         |                                          | P + E + S: 1.73 (0.97-3.11) <sup>L,K</sup><br>P + E + S: 1.65 (0.95-2.86) <sup>L,K</sup><br>P + E + S: 0.95 (0.63-1.43) <sup>L,L</sup><br>P + E + S: 0.97 (0.67-1.39) <sup>L,L</sup><br>P + E + S: 0.71 (0.41-1.19) <sup>L,M</sup><br>P + E + S: 0.83 (0.50-1.35) <sup>L,M</sup>                                      |
| Hasselmann, 2016 (34)          |                                                                  |                                                                                         |                                          | P + E + S: 1.35 (1.07-1.71) <sup>G</sup><br>P + E + S: 1.56 (1.16-1.95) <sup>H</sup>                                                                                                                                                                                                                                  |
| Islam, 2016 (26)               |                                                                  | P: 0.17 (0.07-0.4) <sup>C</sup><br>E: 0.51 (0.26-1) <sup>D</sup><br>S: 0.43 (0.18-1.06) |                                          |                                                                                                                                                                                                                                                                                                                       |
| Sørbo, 2015 (35)               |                                                                  |                                                                                         |                                          |                                                                                                                                                                                                                                                                                                                       |
| James, 2014 (27)               |                                                                  |                                                                                         |                                          |                                                                                                                                                                                                                                                                                                                       |
| Moraes, 2011 (28)              |                                                                  | P: 1.17 (0.89-1.53) <sup>E</sup>                                                        |                                          |                                                                                                                                                                                                                                                                                                                       |
| Shroff, 2011 (29)              |                                                                  | P: 0.69 (0.42-1.11)                                                                     |                                          |                                                                                                                                                                                                                                                                                                                       |
| Lau, 2007 (30)                 |                                                                  |                                                                                         |                                          | P + E + S: 1.839 (1.61-2.911) <sup>F</sup>                                                                                                                                                                                                                                                                            |
| Silverman, 2006 (31)           |                                                                  |                                                                                         |                                          |                                                                                                                                                                                                                                                                                                                       |

\* IPV measured as physical (P), or emotional (E) or sexual (S)

\*\* IPV measured as physical (P), emotional/psychological/mental (M) and sexual (S) combined

<sup>A</sup> Measured as crude OR and interpreted as lower likelihood of EBF

<sup>B</sup> Lifetime IPV and interpreted as lower odds of EBF

<sup>C</sup> Interpreted as 83 % greater risk of discontinuing EBF

<sup>D</sup> Interpreted as 49 % less likely to exclusively breastfeed

<sup>E</sup> Measured as HR and interpreted as probability of early cessation of EBF

<sup>F</sup> Measured as experience of 'no IPV' and interpreted as more likely to breastfeed

<sup>G</sup> IPV until 3<sup>rd</sup> month postpartum measured as RR

<sup>H</sup> IPV in the 3<sup>rd</sup> month postpartum measured as RR

<sup>I</sup> EBF at 4 weeks postpartum

<sup>J</sup> EBF at 14 weeks postpartum

<sup>K</sup> White women

<sup>L</sup> Black women

<sup>M</sup> Hispanic women

N EBF at 1 month

O EBF at 2 months

P EBF at 4 months

Q EBF at 6 months

R EBF at 9 months

S EBF at 12 months

T OR measured at: [https://www.medcalc.org/calc/odds\\_ratio.php](https://www.medcalc.org/calc/odds_ratio.php)
